# Supplementary material for: Database of Optimized Proteomic Quantitative Methods for Human Drug Disposition‐Related Proteins for Applications in Physiologically Based Pharmacokinetic Modeling
Source: PubMed Central journal article supplement — CPT Pharmacometrics Syst Pharmacol. 2017 Apr 4;6(4):267–76. doi: 10.1002/psp4.12170 (PMC5397556; doi:10.1002/psp4.12170), 2017-04-04
Supplement: PSP4-6-267-s001.pdf [file PSP4-6-267-s001.pdf]

## Supplementary information

**A database of optimized proteomic quantitative methods for 284 human drug disposition related proteins for applications in PBPK modeling**

Marc Vrana<sup>1</sup>, Dale Whittington<sup>2</sup>, Vivek Nautiyal<sup>3#</sup> and Bhagwat Prasad<sup>1,\*</sup>

<sup>1</sup>Department of Pharmaceutics and <sup>2</sup>Medicinal Chemistry, University of Washington, Seattle, P.O. Box 357610, WA 98195, USA.

<sup>3</sup>Indian Institute of Technology Kharagpur, Kharagpur, West Bengal, 721302, India

**Running title: Proteomic quantification methods for ADME proteins**

**Corresponding author:** \*Department of Pharmaceutics, University of Washington, Seattle, P.O. Box 357610, WA 98195, USA. Phone: +1-206-221-3035. Fax: +1-206-543-3204.

Email: [bhagwat@u.washington.edu](mailto:bhagwat@u.washington.edu)

#Current address: Informatica Business Solutions PVT. LTD, No. 66/1, Bagmane Commerz 02, Bagmane Tech Park , C V Raman Nagar, Bangalore, Karnataka 560093, India

**Supplementary Table 1:** Optimized LC methods for peptide separation using two different UPLC columns

**Supplementary Table 2:** List of investigated ADME gene products, optimized surrogate peptides and LC-MRM parameters

**Supplementary Table 3:** Number of donors in subcellular fractions obtained from Xenotech, LLC and UW. Number in parenthesis indicates lot number.

**Supplementary Fig. 1.** Correlation of predicted retention time (RT) and predicted hydrophathy (SSRT) in two different columns, A. ACQUITY UPLC BEH C18 Column, 1.7  $\mu\text{m}$ , 3 mm X 150 mm, and B. ACQUITY UPLC<sup>®</sup> HSS T3 1.8  $\mu\text{m}$ , 2.1 x 100 mm, Waters (Methods 1 and 2 in supplementary Table 1, respectively)

**Supplementary Fig. 2.** Differential expression of representative DMEs in microsomal vs. cytosolic fraction. Values are expressed as % of cytosolic expression level to microsome expression level (i.e., cytosol value/microsome value). The values in the y-axis are in logarithmic scale.

**Supplementary Fig. 3.** Relative expression of selected ADME proteins in human liver, kidney, intestine and lung, standardized to liver. The % relative values in the y-axis are in logarithmic scale. Once area ratios for each peptide were established, the relative expression level for the liver was set as “100”, and the values from other tissues for the same protein were compared. If no expression was seen in a tissue, it was determined to be “0”. If the liver had no expression, the kidney was considered as “100”, and other tissue expression was compared to the kidney. If neither liver nor kidney had expression, then the intestinal value was set to “100”.

**Supplementary Figs. 4 and 5.** Screenshots of Qpromics database showing live online output and excel output for a representative method search.

**Supplementary Table 1S: LC methods for quantification of surrogate peptides of DMEs, transporters and receptors**

| LC Method 1             |                                                                                      |    |    |
|-------------------------|--------------------------------------------------------------------------------------|----|----|
| Column                  | UPLC column (ACQUITY UPLC BEH C18 Column, 1.7 $\mu\text{m}$ , 3 mm X 150 mm, Waters) |    |    |
| Guard column            | Security Guard column (C18, 4 mm x 2.0 mm, Phenomenex)                               |    |    |
| Run Time:               | 48 min                                                                               |    |    |
| Injection volume        | 5 $\mu\text{l}$                                                                      |    |    |
| Column oven temperature | 25 $^{\circ}\text{C}$                                                                |    |    |
| Autosampler temperature | 6 $^{\circ}\text{C}$                                                                 |    |    |
| Gradient Table:         |                                                                                      |    |    |
| Time                    | Flow Rate (ml/min)                                                                   | %A | %B |
| 0.0                     | 0.3                                                                                  | 97 | 3  |
| 3.0                     | 0.3                                                                                  | 97 | 3  |

|      |     |    |    |
|------|-----|----|----|
| 10.0 | 0.3 | 90 | 10 |
| 40.0 | 0.3 | 10 | 90 |
| 40.9 | 0.3 | 10 | 90 |
| 41.0 | 0.3 | 97 | 3  |
| 48.0 | 0.3 | 97 | 3  |

#### LC Method 2

|                         |                                                                     |    |    |
|-------------------------|---------------------------------------------------------------------|----|----|
| Column                  | UPLC column (ACQUITY UPLC HSS T3 1.8 $\mu$ m, 2.1 x 100 mm, Waters) |    |    |
| Guard column            | Security Guard column (C18, 4 mm x 2.0 mm, Phenomenex)              |    |    |
| Run Time:               | 27 min                                                              |    |    |
| Injection volume        | 5 $\mu$ l                                                           |    |    |
| Column oven temperature | 25 °C                                                               |    |    |
| Autosampler temperature | 6 °C                                                                |    |    |
| Gradient Table:         |                                                                     |    |    |
| Time                    | Flow Rate<br>(ml/min)                                               | %A | %B |
| 0.0                     | 0.3                                                                 | 97 | 3  |
| 4.0                     | 0.3                                                                 | 97 | 3  |
| 8.0                     | 0.3                                                                 | 87 | 13 |
| 18.0                    | 0.3                                                                 | 70 | 30 |
| 22.9                    | 0.3                                                                 | 60 | 40 |
| 23.0                    | 0.3                                                                 | 40 | 60 |
| 23.1                    | 0.3                                                                 | 97 | 3  |
| 27.0                    | 0.3                                                                 | 97 | 3  |

A = 0.1% formic acid water; B = 0.1% formic acid acetonitrile

#### Supplementary Table 2Sa: Unique surrogate peptides identified for ADME proteins

| Uniprot ID and protein name | Peptide                |
|-----------------------------|------------------------|
| P00352, ALDH1A1             | ANNTFYGLSAGVFTK        |
| P00352, ALDH1A1             | IFVEESYDEFVR           |
| P00352, ALDH1A1             | IFINNEWHDSVSGK         |
| O94788, ALDH1A2             | IFINNEWQNSESGR         |
| O94788, ALDH1A2             | ILELIQSGVAEGAK         |
| O94788, ALDH1A2             | ANNSDFGLVAAVFTNDINK    |
| P04798, CYP1A1              | IQEELDTVIGR            |
| P04798, CYP1A1              | YLPNPSLNAFK            |
| P04798, CYP1A1              | HSSFVPFTIPHSTTR        |
| P05177, CYP1A2              | FLTADGTAINKPLSEK       |
| P05177, CYP1A2              | IGSTPVLVLSR            |
| P05177, CYP1A2              | NTHEFVETASSGNPLDFFPILR |
| P11509, CYP2A6              | GTGGANIDPTFFLSR        |
| P11509, CYP2A6              | DPSFFSNPQDFNPQHFLNEK   |

|                 |                          |
|-----------------|--------------------------|
| P20813, CYP2B6  | TEAFIPFSLGK              |
| P20813, CYP2B6  | GYGVIFANGNR              |
| P20813, CYP2B6  | IQEEAQCLIEELR            |
| P33260, CYP2C18 | DIDITPIANAFGR            |
| P33260, CYP2C18 | GTTIITSLTSVLHNDK         |
| P33260, CYP2C18 | EALIDHGEEFSGR            |
| P10632, CYP2C8  | YSDLVPTGVPHAVTTDTK       |
| P10632, CYP2C8  | VQEEIDHVIGR              |
| P11712, CYP2C9  | YIDLLPTSLPHAVTCDIK       |
| P11712, CYP2C9  | GIFPLAER                 |
| P11712, CYP2C9  | LPPGPTPLPVIGNILQIGIK     |
| P10635, CYP2D6  | GTTLITNLSSVLK            |
| P10635, CYP2D6  | VQQEIDDVIGQVR            |
| P10635, CYP2D6  | AVSNVIASLTCGR            |
| P05181, CYP2E1  | FITLVPSNLPHEATR          |
| P05181, CYP2E1  | FGPVFTLYVGSQR            |
| P05181, CYP2E1  | GTVVVPTLDSVLYDNQEFDPDEK  |
| P51589, CYP2J2  | VIGQQQPSTAAR             |
| P51589, CYP2J2  | EVTVDTTLAGYHLPK          |
| P51589, CYP2J2  | LLDEVTYLEASK             |
| P08684, CYP3A4  | LSLGLLQPEKPVVLK          |
| P08684, CYP3A4  | LGIPGPTPLPFLGNILSYHK     |
| P08684, CYP3A4  | EVTNFLR                  |
| Q9HB55, CYP3A43 | LDNLPILQPEKPIVLK         |
| Q9HB55, CYP3A43 | TLLSPAFTSVK              |
| Q9HB55, CYP3A43 | DIEINGVFIPK              |
| P20815, CYP3A5  | LDTQGLLQPEKPIVLK         |
| P20815, CYP3A5  | DVEINGVFIPK              |
| P20815, CYP3A5  | DSIDPYIYTPFGTGPR         |
| P24462, CYP3A7  | FGLLLLTEKPIVLK           |
| P24462, CYP3A7  | FNPLDPFVLSIK             |
| P24462, CYP3A7  | LGIPGPTPLPFLGNALSFR      |
| P30711, GSTT1   | GQHLSDAFAQVNPLK          |
| P30711, GSTT1   | VDEYLAWQHHTTLR           |
| P30711, GSTT1   | VEAAVGEDLFQEAHEVILK      |
| P18440, NAT1    | EQYIPNEEFLHSDLLEDSK      |
| P18440, NAT1    | NIFNISLQR                |
| P18440, NAT1    | TLSEEEIEK                |
| P11245, NAT2    | LDLETLDILEHQIR           |
| P11245, NAT2    | TLTEEEVEEVLK             |
| P50225, SULT1A1 | VHPEPGTWDSFLEK           |
| P50225, SULT1A1 | SLPEETVDFVQHTSFK         |
| P22309, UGT1A1  | GHEIVVLAPDASLYIR         |
| P22309, UGT1A1  | ESFVSLGHNVFENDSFLQR      |
| Q9HAW8, UGT1A10 | TYSTSYTLEDQNR            |
| Q9HAW8, UGT1A10 | YFSLPSVVFTR              |
| P35503, UGT1A3  | HLNATSFVVLTDVPVNLCAAVLAK |
| P22310, UGT1A4  | FFTLTAYAVPWTQK           |
| P22310, UGT1A4  | GTQCPNPSSYIPK            |
| P22310, UGT1A4  | YLSIPAVFFWR              |

|                 |                         |
|-----------------|-------------------------|
| P35504, UGT1A5  | YLSIPAVFFLR             |
| P35504, UGT1A5  | EVSVVDLVSHASVWLFR       |
| P19224, UGT1A6  | DVDIITLYQK              |
| P19224, UGT1A6  | SFLTAPQTEYR             |
| P19224, UGT1A6  | DIVEVLSDR               |
| Q9HAW7, UGT1A7  | TYSTSYTLEDQDR           |
| Q9HAW7, UGT1A7  | GIFCHYLEEGAQC PAPLSYVPR |
| Q9HAW9, UGT1A8  | ESSFDAVFLDPFDACGLIVAK   |
| Q9HAW9, UGT1A8  | GIACHYLEEGAQC PAPLSYVPR |
| O60656, UGT1A9  | ESSFDAVFLDPFDNCGLIVAK   |
| O60656, UGT1A9  | AFAHAQWK                |
| P54855, UGT2B15 | SVINDPVYK               |
| P54855, UGT2B15 | GHEVTVLTSSASTLVNASK     |
| P54855, UGT2B15 | NYLEDSLLK               |
| O75795, UGT2B17 | FSVGYTVEK               |
| O75795, UGT2B17 | SVINDPIYK               |
| O75795, UGT2B17 | LCEDAVLNK               |
| P16662, UGT2B7  | ANVIASALAQIPQK          |
| P16662, UGT2B7  | IEIYPTSLTK              |
| P16662, UGT2B7  | TILDELIQR               |
| P09488, GSTM1   | RPWFAGNK                |
| P09488, GSTM1   | FLPRPVFSK               |
| P09211, GSTP1   | FQDGDLTLYQSNTILR        |
| P09211, GSTP1   | ALPGQLKPFETLLSQNQGGK    |
| P09211, GSTP1   | EEVVTVETWQEGSLK         |
| P33261, CYP2C19 | GTTILTSLTSVLHDNK        |
| P33261, CYP2C19 | HFLDEGGNFK              |
| P51580, TPMT    | TAFHQEQGHQLLK           |
| P51580, TPMT    | NQVLTLEEWQDK            |
| P51580, TPMT    | SWGIDCLFEK              |
| P08183, ABCB1   | AGAVAEVLAAIR            |
| P08183, ABCB1   | IATEAIENFR              |
| Q92887, ABCC2   | YLGDDDLDTSAIR           |
| Q92887, ABCC2   | NQSQSQDALVLEDVEK        |
| Q92887, ABCC2   | LTIIQDPILFSGSLR         |
| O15438, ABCC3   | IDGLNVADIGLHDLR         |
| O15438, ABCC3   | GVVAEFDSPANLIAAR        |
| O15438, ABCC3   | NVDPNPYPETSAGFLSR       |
| O15439, ABCC4   | IQTFLLLDEISQR           |
| O15439, ABCC4   | AEAAALTETAK.heavy       |
| O15439, ABCC4   | DGALESQDTENVPVTLSEENR   |
| Q9UNQ0, ABCG2   | LFDSLTLASGR             |
| Q9UNQ0, ABCG2   | SLLDVLAAR               |
| Q9UNQ0, ABCG2   | TIIFSIHQPR              |
| Q14973, SLC10A1 | GIYDGDLK                |
| Q16348, SLC15A2 | YHNLSLYTEHSVQEK         |
| Q16348, SLC15A2 | IYNKPPPEGNIVAQVFK       |
| O15245, SLC22A1 | YEVDWNQSALSCVDPLASLATNR |
| O15245, SLC22A1 | LSPSFADLFR              |
| O15245, SLC22A1 | ENTIYLK                 |

|                 |                           |
|-----------------|---------------------------|
| O15244, SLC22A2 | SPGVAELSLR                |
| O15244, SLC22A2 | CGWSPAEEELNYTPGPGPAGEASPR |
| O15244, SLC22A2 | LNPSFLDLVR                |
| O75751, SLC22A3 | GIALPETVDDVEK             |
| O75751, SLC22A3 | FLQGVFGK                  |
| O75751, SLC22A3 | GPSAAALAER                |
| Q4U2R8, SLC22A6 | NGGLEVWLPR                |
| Q4U2R8, SLC22A6 | EAGIYPR                   |
| O00337, SLC28A1 | AGSSFVFGGEALVK            |
| O00337, SLC28A1 | LAGAEEWVGDR               |
| O00337, SLC28A1 | LYGDAQNLIEAASTGAAISVK     |
| O43868, SLC28A2 | TDAQGHSLGDGLGPSTYQR       |
| O43868, SLC28A2 | GLFQSTSLNGTNPPSFSGPWEDK   |
| O43868, SLC28A2 | GAEADCVSFPNTSFTNR         |
| Q9HAS3, SLC28A3 | GPGEVIPGGNHSLSL           |
| Q9HAS3, SLC28A3 | FVNGVQQYISIR              |
| Q9HAS3, SLC28A3 | TFFNEFVAYEHLK             |
| P46721, SLC01A2 | EGLETNADIK                |
| P46721, SLC01A2 | CHLPGENASSGTELIETK        |
| P46721, SLC01A2 | IYDSTTFR                  |
| Q9Y6L6, SLC01B1 | NVTGFFQSFK                |
| Q9NPD5, SLC01B3 | IYNSVFFGR                 |
| Q9NPD5, SLC01B3 | NQTANLTNQGK               |
| Q9NPD5, SLC01B3 | WSTNSCGAQGACR             |
| O94956, SLC02B1 | SSPAVEQQLLVSGPGK          |
| O94956, SLC02B1 | ASPDPQDVRPSVFHNIK         |
| O94956, SLC02B1 | VLAVTDSPAR                |
| Q6ZQN7, SLC04C1 | GIENLAFVPSSPDILR          |
| Q6ZQN7, SLC04C1 | ENAVVTNVLAEQDLNK          |
| Q6ZQN7, SLC04C1 | HLPGTAEIQAGK              |
| P07327, ADH1A   | NDVSNPQGTLQDGTSR          |
| P07327, ADH1A   | KPIHHFLGISTFSQYTVVDENAVAK |
| P07327, ADH1A   | GAILGGFK                  |
| P00325, ADH1B   | KPFSIEDVEVAPPK            |
| P00325, ADH1B   | AAVLWEVK                  |
| P00326, ADH1C   | VCLIGCGFSTGYGSAVK         |
| P00326, ADH1C   | INEGFDLLR                 |
| P00326, ADH1C   | GAIFGGFK                  |
| P47895, ALDH1A3 | LLHQLADLVER               |
| P47895, ALDH1A3 | AVEAAQVAFQR               |
| P47895, ALDH1A3 | EQICEVEEGDKPDVVK          |
| Q06278, AOX1    | LILNEVSLGSAVGGK           |
| Q06278, AOX1    | NHPEPTLDQLTDALGGNLCR      |
| Q06278, AOX1    | GLHGPLTLNSPLTPEK          |
| P23141, CES1    | AISESGVALTSVLVK           |
| P23141, CES1    | EGYLQIGANTQAAQK           |
| P23141, CES1    | AGQLLSELFTR               |
| O00748, CES2    | FTEEEEQLSR                |
| O00748, CES2    | TTHTGQVLGSLVHVK           |
| O00748, CES2    | ADHGDELPFVFR              |

|                    |                      |
|--------------------|----------------------|
| Q12882, DPYD       | ADVVISAFGSVLSDPK     |
| Q12882, DPYD       | LTPNVTDIVSIAR        |
| Q12882, DPYD       | DSADIESILALNPR       |
| P07099, EPHX1      | GGHFAAFEPELLAQDIR    |
| P07099, EPHX1      | VETSDEEIHDLHQR       |
| P07099, EPHX1      | YLEDGGLER            |
| P34913, EPHX2      | VCEAGGLFVNSPEEPSLSR  |
| P34913, EPHX2      | GLLNDAFQK            |
| P34913, EPHX2      | ASPSEVVFLDDIGANLKPAR |
| Q01740, FMO1       | SDDLGLLWR            |
| Q01740, FMO1       | VEDGQASLYK           |
| Q99518, FMO2       | ASIYQSVVTNTSK        |
| Q99518, FMO2       | WFNHENYGLEPQNK       |
| Q99518, FMO2       | YIFPAHLDK            |
| P31513, FMO3       | NNLPTAISDWLYVK       |
| P31513, FMO3       | LVGPGQWPGAR          |
| P31513, FMO3       | VAIIGAGVSGLASIR      |
| P08263, GSTA1      | LHYFNAR              |
| P09210, GSTA2      | LHYSNIR              |
| P09210, GSTA2      | LALIQEK              |
| Q16772, GSTA3      | VLQSHGQDYLVGNK       |
| Q16772, GSTA3      | FIGSAEDLGK           |
| Q16772, GSTA3      | LHYFNGR              |
| O15217, GSTA4      | SILHYIADK            |
| O15217, GSTA4      | YFPVFEK              |
| Q7RTV2, GSTA5      | WLLAAAGVELEEK        |
| Q7RTV2, GSTA5      | FLESAEDLDK           |
| Q7RTV2, GSTA5      | FLQPGSQR             |
| P28161, GSTM2      | LGLDFPNLPYLIDGTHK    |
| P28161, GSTM2      | NQVFEPSCLDAFPNLK     |
| P28161, GSTM2      | ITFVDFIAYDVLER       |
| P21266, GSTM3      | IAAYLQSDQFCK         |
| P21266, GSTM3      | LKPQYLEELPGQLK       |
| P21266, GSTM3      | FSWFAGEK             |
| Q03013, GSTM4      | IFEPNCLDAFPNLK       |
| Q03013, GSTM4      | ITFVDFLAYDVLDLHR     |
| Q03013, GSTM4      | RPWFVGDK             |
| P50226, SULT1A2    | VYPHPGTWESFLEK       |
| P50226, SULT1A2    | FDADYAK              |
| P50224, SULT1A3*   | AHPEPGTWDSFLEK       |
| P50224, SULT1A3*   | DVAVSYYHFHR          |
| O43704, SULT1B1    | NYFTVAQNEK           |
| O43704, SULT1B1    | IEQFHSRPDDIVIATYPK   |
| O43704, SULT1B1    | THLPTDLLPK           |
| O00338, SULT1C1/C2 | IVQETSFEK            |
| O00338, SULT1C1/C2 | NHFTVAQNER           |
| O00338, SULT1C1/C2 | VVWGSWFDHVK          |
| P49888, SULT1E1    | NHFTVALNEK           |
| P49888, SULT1E1    | LIHFLER              |
| Q06520, SULT2A1    | NHFTVAQAEDFDK        |

|                  |                           |
|------------------|---------------------------|
| Q06520, SULT2A1  | TLEPEELNLILK              |
| Q06520, SULT2A1  | LFSSHLPIQLFPK             |
| O00204, SULT2B1  | GEVQFGSWFDHIK             |
| O00204, SULT2B1  | APWCETIVGAFSLPDQYSPR      |
| O00204, SULT2B1  | NHFTVAQSEAFDR             |
| Q9BR01, SULT4A1  | DLVVSYYQFHR               |
| Q9BR01, SULT4A1  | FLPSDLHNGDSK              |
| Q9BR01, SULT4A1  | YFEFHGVR                  |
| Q9Y4X1, UGT2A1   | ANLIASALAQIPQK            |
| Q9Y4X1, UGT2A1   | KPATLGNNTQLFDWIPQNDLLGHPK |
| P36537, UGT2B10  | GHEVTVLASSASILFDPNDSSTLK  |
| O75310, UGT2B11  | GHEVTVLASSASILFDPNDASTLK  |
| O75310, UGT2B11  | FTPGYTIER                 |
| Q9BY64, UGT2B28  | WIPQNDLLGLPK              |
| Q9BY64, UGT2B28  | GHEVTVLASSASILFDPNDAFTLK  |
| P06133, UGT2B4   | ANVIASALAK                |
| P06133, UGT2B4   | FEVYPVSLTK                |
| P06133, UGT2B4   | TILDELVQR                 |
| O95342, ABCB11   | AAATSIFETIDR              |
| O95342, ABCB11   | VGFFQLFR                  |
| O95342, ABCB11   | AADTIIGFEHGTAVER          |
| Q9NSA0, SLC22A11 | GKPDQALQELR               |
| Q9NSA0, SLC22A11 | SVLDFCVPVLR               |
| Q9NSA0, SLC22A11 | SVFTSTIVAK                |
| Q96S37, SLC22A12 | ATHGTLGNSVLK              |
| Q96S37, SLC22A12 | SIFTSTIVAK                |
| Q96S37, SLC22A12 | LDWGLQELWR                |
| Q86VW1, SLC22A16 | ENTSSLGYEYTGSK            |
| Q86VW1, SLC22A16 | LLTTNNSGLEK               |
| Q86VW1, SLC22A16 | LSELLSLDLQGPVNSPTEVQK     |
| Q9H015, SLC22A4  | WLISQR                    |
| Q9H015, SLC22A4  | DYDEVIAFLGEWGPFR          |
| Q9H015, SLC22A4  | AFILDLFR                  |
| O76082, SLC22A5  | FEEAEVIIR                 |
| O76082, SLC22A5  | QQSHNILDLLR               |
| O76082, SLC22A5  | ANGIVVPSTIFDPSELQDLSSK    |
| Q9Y694, SLC22A7  | FAYPQALPNTTLGEER          |
| Q9Y694, SLC22A7  | QAQLPETIQDVER             |
| Q9Y694, SLC22A7  | CALPGAPANFSHQDVWLEAHLPR   |
| Q8TCC7, SLC22A8  | FVHPPNASLPNDTQR           |
| Q8TCC7, SLC22A8  | YTASDLFR                  |
| Q8IVM8, SLC22A9  | NKPLFDTIQDEK              |
| Q8IVM8, SLC22A9  | DTLTLEILK                 |
| Q6PCB7, SLC27A1  | LLGQTDVAVYGVAVPGVEGK      |
| Q6PCB7, SLC27A1  | FCSGDLGPEGILPDTHLLDPLLK   |
| Q6PCB7, SLC27A1  | QGHYLPLNEAVYTR            |
| Q99808, SLC29A1  | EESGVSVSNSQPTNESHNIK      |
| Q99808, SLC29A1  | DAQASAAPAAPLPER           |
| Q99808, SLC29A1  | LEGPGEQETK                |
| Q14542, SLC29A2  | AELLQSDENGIPSSPQK         |



|                 |                       |
|-----------------|-----------------------|
| Q14542, SLC29A2 | SLTSYFLWPDEDSR        |
| Q14542, SLC29A2 | SSQAQAQLETK           |
| Q96FL8, SLC47A1 | QEEPLPEHPQDGAK        |
| Q96FL8, SLC47A1 | ACQQAQVHANLK          |
| Q96FL8, SLC47A1 | GGPEATLEVR            |
| Q86VL8, SLC47A2 | TPEEHALSAPTSR         |
| Q86VL8, SLC47A2 | AVLSSVATGSSPGITLTTYSR |
| Q86VL8, SLC47A2 | SECHVDFFR             |

---

**Supplementary Table 2Sb: List of ADME gene products, surrogate peptides and LC-MRM parameters for Xevo TQS triple quadrupole instrument**

| Protein | Peptide          | RT   | Parent | Product | CV | CE |
|---------|------------------|------|--------|---------|----|----|
| ABCB1   | AGAVAEVLAIR      | 35.1 | 635.4  | 971.6   | 35 | 21 |
| ABCB1   | AGAVAEVLAIR      | 35.1 | 635.4  | 900.5   | 35 | 21 |
| ABCB1   | AGAVAEVLAIR      | 35.1 | 635.4  | 430.3   | 35 | 21 |
| ABCB1   | AGAVAEVLAIR      | 35.1 | 640.4  | 981.6   | 35 | 21 |
| ABCB1   | AGAVAEVLAIR      | 35.1 | 640.4  | 440.3   | 35 | 21 |
| ABCB1   | IATEAIENFR       | 24.5 | 582.3  | 486.3   | 35 | 15 |
| ABCB1   | IATEAIENFR       | 24.5 | 582.3  | 979.5   | 35 | 15 |
| ABCB1   | IATEAIENFR       | 24.5 | 582.3  | 749.4   | 35 | 15 |
| ABCB1   | IATEAIENFR       | 24.5 | 582.3  | 678.4   | 35 | 15 |
| ABCB1   | IATEAIENFR       | 24.5 | 582.3  | 490.2   | 35 | 15 |
| ABCB1   | IATEAIENFR       | 24.5 | 587.3  | 688.4   | 35 | 15 |
| ABCB1   | IATEAIENFR       | 24.5 | 587.3  | 495.2   | 35 | 15 |
| ABCB11  | AAATSIFETIDR     | 31.0 | 647.8  | 980.5   | 35 | 21 |
| ABCB11  | AAATSIFETIDR     | 31.0 | 647.8  | 780.4   | 35 | 21 |
| ABCB11  | AAATSIFETIDR     | 31.0 | 647.8  | 633.3   | 35 | 21 |
| ABCB11  | AAATSIFETIDR     | 31.0 | 652.8  | 903.5   | 35 | 21 |
| ABCB11  | AAATSIFETIDR     | 31.0 | 652.8  | 790.4   | 35 | 21 |
| ABCB11  | AADTIIGFEHGTAVR  | 24.9 | 563.0  | 472.2   | 35 | 16 |
| ABCB11  | AADTIIGFEHGTAVR  | 24.9 | 563.0  | 608.3   | 35 | 16 |
| ABCB11  | AADTIIGFEHGTAVR  | 24.9 | 563.0  | 551.8   | 35 | 16 |
| ABCB11  | AADTIIGFEHGTAVR  | 24.9 | 566.3  | 613.3   | 35 | 16 |
| ABCB11  | AADTIIGFEHGTAVR  | 24.9 | 566.3  | 556.8   | 35 | 16 |
| ABCB11  | VGFFQLFR         | 40.9 | 507.3  | 914.5   | 35 | 17 |
| ABCB11  | VGFFQLFR         | 40.9 | 507.3  | 710.4   | 35 | 17 |
| ABCB11  | VGFFQLFR         | 40.9 | 507.3  | 563.3   | 35 | 17 |
| ABCB11  | VGFFQLFR         | 40.9 | 512.3  | 720.4   | 35 | 17 |
| ABCB11  | VGFFQLFR         | 40.9 | 512.3  | 573.3   | 35 | 17 |
| ABCC2   | LTIIPQDPILFSGSLR | 39.1 | 885.5  | 1329.7  | 35 | 25 |
| ABCC2   | LTIIPQDPILFSGSLR | 39.1 | 885.5  | 721.9   | 35 | 25 |
| ABCC2   | LTIIPQDPILFSGSLR | 39.1 | 885.5  | 665.4   | 35 | 25 |
| ABCC2   | LTIIPQDPILFSGSLR | 39.1 | 890.5  | 1339.7  | 35 | 25 |
| ABCC2   | LTIIPQDPILFSGSLR | 39.1 | 890.5  | 670.4   | 35 | 25 |
| ABCC2   | NQSQSQDALVLEDVEK | 28.7 | 901.9  | 831.4   | 35 | 33 |
| ABCC2   | NQSQSQDALVLEDVEK | 28.7 | 901.9  | 732.4   | 35 | 33 |
| ABCC2   | NQSQSQDALVLEDVEK | 28.7 | 901.9  | 619.3   | 35 | 33 |
| ABCC2   | NQSQSQDALVLEDVEK | 28.7 | 901.9  | 490.3   | 35 | 33 |
| ABCC2   | NQSQSQDALVLEDVEK | 28.7 | 905.9  | 839.5   | 35 | 33 |
| ABCC2   | NQSQSQDALVLEDVEK | 28.7 | 905.9  | 740.4   | 35 | 33 |
| ABCC2   | NQSQSQDALVLEDVEK | 28.7 | 905.9  | 627.3   | 35 | 33 |
| ABCC2   | NQSQSQDALVLEDVEK | 28.7 | 905.9  | 498.3   | 35 | 33 |
| ABCC2   | YLGDDLDTSAIR     | 24.6 | 698.3  | 1119.5  | 35 | 27 |
| ABCC2   | YLGDDLDTSAIR     | 24.6 | 698.3  | 775.4   | 35 | 27 |
| ABCC2   | YLGDDLDTSAIR     | 24.6 | 698.3  | 662.3   | 35 | 27 |
| ABCC2   | YLGDDLDTSAIR     | 24.6 | 698.3  | 547.3   | 35 | 27 |
| ABCC2   | YLGDDLDTSAIR     | 24.6 | 703.3  | 1129.5  | 35 | 27 |
| ABCC2   | YLGDDLDTSAIR     | 24.6 | 703.3  | 557.3   | 35 | 27 |

|       |                       |      |        |        |    |    |
|-------|-----------------------|------|--------|--------|----|----|
| ABCC3 | GVVAEFDSPANLIAAR      | 32.9 | 815.4  | 1174.6 | 35 | 21 |
| ABCC3 | GVVAEFDSPANLIAAR      | 32.9 | 815.4  | 1027.6 | 35 | 21 |
| ABCC3 | GVVAEFDSPANLIAAR      | 32.9 | 815.4  | 825.5  | 35 | 21 |
| ABCC3 | GVVAEFDSPANLIAAR      | 32.9 | 815.4  | 317.2  | 35 | 21 |
| ABCC3 | GVVAEFDSPANLIAAR      | 32.9 | 820.4  | 835.5  | 35 | 21 |
| ABCC3 | GVVAEFDSPANLIAAR      | 32.9 | 820.4  | 327.2  | 35 | 21 |
| ABCC3 | IDGLNVADIGLHDLR       | 32.7 | 541.0  | 288.2  | 35 | 20 |
| ABCC3 | IDGLNVADIGLHDLR       | 32.7 | 541.0  | 754.4  | 35 | 20 |
| ABCC3 | IDGLNVADIGLHDLR       | 32.7 | 541.0  | 696.9  | 35 | 20 |
| ABCC3 | IDGLNVADIGLHDLR       | 32.7 | 541.0  | 611.8  | 35 | 20 |
| ABCC3 | IDGLNVADIGLHDLR       | 32.7 | 541.0  | 505.3  | 35 | 20 |
| ABCC3 | IDGLNVADIGLHDLR       | 32.7 | 544.3  | 298.2  | 35 | 20 |
| ABCC3 | IDGLNVADIGLHDLR       | 32.7 | 544.3  | 510.3  | 35 | 20 |
| ABCC3 | NVDPNPYPETSAGFLSR     | 27.2 | 932.4  | 1324.7 | 35 | 25 |
| ABCC3 | NVDPNPYPETSAGFLSR     | 27.2 | 932.4  | 1064.5 | 35 | 25 |
| ABCC3 | NVDPNPYPETSAGFLSR     | 27.2 | 932.4  | 825.9  | 35 | 25 |
| ABCC3 | NVDPNPYPETSAGFLSR     | 27.2 | 932.4  | 768.4  | 35 | 25 |
| ABCC3 | NVDPNPYPETSAGFLSR     | 27.2 | 937.5  | 830.9  | 35 | 25 |
| ABCC3 | NVDPNPYPETSAGFLSR     | 27.2 | 937.5  | 773.4  | 35 | 25 |
| ABCC4 | AEAAALTETAK           | 27.2 | 542.3  | 883.5  | 35 | 22 |
| ABCC4 | AEAAALTETAK           | 27.2 | 542.3  | 812.5  | 35 | 22 |
| ABCC4 | AEAAALTETAK           | 27.2 | 542.3  | 741.4  | 35 | 22 |
| ABCC4 | AEAAALTETAK           | 27.2 | 542.3  | 670.4  | 35 | 22 |
| ABCC4 | AEAAALTETAK           | 27.2 | 542.3  | 557.3  | 35 | 22 |
| ABCC4 | AEAAALTETAK           | 27.2 | 538.3  | 875.5  | 35 | 22 |
| ABCC4 | AEAAALTETAK           | 27.2 | 538.3  | 804.4  | 35 | 22 |
| ABCC4 | AEAAALTETAK           | 27.2 | 538.3  | 733.4  | 35 | 22 |
| ABCC4 | AEAAALTETAK           | 27.2 | 538.3  | 662.4  | 35 | 22 |
| ABCC4 | AEAAALTETAK           | 27.2 | 538.3  | 549.3  | 35 | 22 |
| ABCC4 | DGALESQDTENVPVTLSEENR | 24.1 | 1152.0 | 1044.5 | 35 | 37 |
| ABCC4 | DGALESQDTENVPVTLSEENR | 24.1 | 1152.0 | 848.4  | 35 | 37 |
| ABCC4 | DGALESQDTENVPVTLSEENR | 24.1 | 1152.0 | 634.3  | 35 | 37 |
| ABCC4 | DGALESQDTENVPVTLSEENR | 24.1 | 1157.0 | 1054.5 | 35 | 37 |
| ABCC4 | DGALESQDTENVPVTLSEENR | 24.1 | 1157.0 | 644.3  | 35 | 37 |
| ABCC4 | IQTFLLLDDEISQR        | 27.2 | 788.4  | 973.5  | 35 | 25 |
| ABCC4 | IQTFLLLDDEISQR        | 27.2 | 788.4  | 860.4  | 35 | 25 |
| ABCC4 | IQTFLLLDDEISQR        | 27.2 | 788.4  | 747.4  | 35 | 25 |
| ABCC4 | IQTFLLLDDEISQR        | 27.2 | 793.4  | 983.5  | 35 | 25 |
| ABCC4 | IQTFLLLDDEISQR        | 27.2 | 793.4  | 870.5  | 35 | 25 |
| ABCC4 | IQTFLLLDDEISQR        | 27.2 | 793.4  | 757.4  | 35 | 25 |
| ABCG2 | LFDSLTLASGR           | 36.3 | 646.9  | 1032.6 | 35 | 17 |
| ABCG2 | LFDSLTLASGR           | 36.3 | 646.9  | 717.4  | 35 | 17 |
| ABCG2 | LFDSLTLASGR           | 36.3 | 646.9  | 503.3  | 35 | 17 |
| ABCG2 | LFDSLTLASGR           | 36.3 | 646.9  | 390.2  | 35 | 17 |
| ABCG2 | LFDSLTLASGR           | 36.3 | 646.9  | 319.2  | 35 | 17 |
| ABCG2 | LFDSLTLASGR           | 36.3 | 651.9  | 400.2  | 35 | 17 |
| ABCG2 | LFDSLTLASGR           | 36.3 | 651.9  | 329.2  | 35 | 17 |
| ABCG2 | SSLLDVLAAR            | 35.3 | 522.8  | 757.5  | 35 | 17 |
| ABCG2 | SSLLDVLAAR            | 35.3 | 522.8  | 644.4  | 35 | 17 |
| ABCG2 | SSLLDVLAAR            | 35.3 | 522.8  | 430.3  | 35 | 17 |

|         |                   |      |       |        |    |    |
|---------|-------------------|------|-------|--------|----|----|
| ABCG2   | SSLLDVLAAR        | 35.3 | 527.8 | 654.4  | 35 | 17 |
| ABCG2   | SSLLDVLAAR        | 35.3 | 527.8 | 440.3  | 35 | 17 |
| ADH1A   | GAILGGFK          | 25.3 | 762.5 | 408.2  | 35 | 25 |
| ADH1A   | GAILGGFK          | 25.3 | 381.7 | 521.3  | 35 | 13 |
| ADH1A   | GAILGGFK          | 25.3 | 381.7 | 408.2  | 35 | 13 |
| ADH1A   | GAILGGFK          | 25.3 | 385.7 | 529.3  | 35 | 13 |
| ADH1A   | GAILGGFK          | 25.3 | 385.7 | 416.2  | 35 | 13 |
| ADH1A   | NDVSNPQGTLQDGTSR  | 15.9 | 844.9 | 1159.6 | 35 | 31 |
| ADH1A   | NDVSNPQGTLQDGTSR  | 15.9 | 844.9 | 535.2  | 35 | 31 |
| ADH1A   | NDVSNPQGTLQDGTSR  | 15.9 | 844.9 | 420.2  | 35 | 31 |
| ADH1A   | NDVSNPQGTLQDGTSR  | 15.9 | 849.9 | 1169.6 | 35 | 31 |
| ADH1A   | NDVSNPQGTLQDGTSR  | 15.9 | 849.9 | 430.2  | 35 | 31 |
| ADH1B   | AAVLWEVK          | 28.3 | 458.3 | 242.1  | 35 | 11 |
| ADH1B   | AAVLWEVK          | 28.3 | 458.3 | 674.4  | 35 | 11 |
| ADH1B   | AAVLWEVK          | 28.3 | 458.3 | 561.3  | 35 | 11 |
| ADH1B   | AAVLWEVK          | 28.3 | 462.3 | 242.1  | 35 | 11 |
| ADH1B   | AAVLWEVK          | 28.3 | 462.3 | 569.3  | 35 | 11 |
| ADH1B   | KPFSIEDVEVAPPK    | 24.6 | 519.3 | 511.3  | 35 | 19 |
| ADH1B   | KPFSIEDVEVAPPK    | 24.6 | 519.3 | 412.3  | 35 | 19 |
| ADH1B   | KPFSIEDVEVAPPK    | 24.6 | 519.3 | 341.2  | 35 | 19 |
| ADH1B   | KPFSIEDVEVAPPK    | 24.6 | 522.0 | 420.3  | 35 | 19 |
| ADH1B   | KPFSIEDVEVAPPK    | 24.6 | 522.0 | 349.2  | 35 | 19 |
| ADH1C   | GAIFGGFK          | 27.9 | 398.7 | 668.4  | 35 | 13 |
| ADH1C   | GAIFGGFK          | 27.9 | 398.7 | 555.3  | 35 | 13 |
| ADH1C   | GAIFGGFK          | 27.9 | 398.7 | 408.2  | 35 | 13 |
| ADH1C   | GAIFGGFK          | 27.9 | 402.7 | 563.3  | 35 | 13 |
| ADH1C   | GAIFGGFK          | 27.9 | 402.7 | 416.2  | 35 | 13 |
| ADH1C   | INEGFDLLR         | 31.2 | 538.8 | 228.1  | 35 | 14 |
| ADH1C   | INEGFDLLR         | 31.2 | 538.8 | 849.4  | 35 | 14 |
| ADH1C   | INEGFDLLR         | 31.2 | 538.8 | 720.4  | 35 | 14 |
| ADH1C   | INEGFDLLR         | 31.2 | 543.8 | 228.1  | 35 | 14 |
| ADH1C   | INEGFDLLR         | 31.2 | 543.8 | 859.5  | 35 | 14 |
| ADH1C   | INEGFDLLR         | 31.2 | 543.8 | 730.4  | 35 | 14 |
| ADH1C   | VCLIGCGFSTGYGSAVK | 29.7 | 888.4 | 1290.6 | 35 | 29 |
| ADH1C   | VCLIGCGFSTGYGSAVK | 29.7 | 888.4 | 869.4  | 35 | 29 |
| ADH1C   | VCLIGCGFSTGYGSAVK | 29.7 | 888.4 | 758.9  | 35 | 29 |
| ADH1C   | VCLIGCGFSTGYGSAVK | 29.7 | 892.4 | 1298.6 | 35 | 29 |
| ADH1C   | VCLIGCGFSTGYGSAVK | 29.7 | 892.4 | 877.5  | 35 | 29 |
| ALDH1A1 | ANNTFYGLSAGVFTK   | 33.3 | 795.4 | 1042.6 | 35 | 24 |
| ALDH1A1 | ANNTFYGLSAGVFTK   | 33.3 | 795.4 | 879.5  | 35 | 24 |
| ALDH1A1 | ANNTFYGLSAGVFTK   | 33.3 | 795.4 | 395.2  | 35 | 24 |
| ALDH1A1 | ANNTFYGLSAGVFTK   | 33.3 | 799.4 | 887.5  | 35 | 24 |
| ALDH1A1 | ANNTFYGLSAGVFTK   | 33.3 | 799.4 | 403.2  | 35 | 24 |
| ALDH1A1 | IFINNEWHDSVSGK    | 24.9 | 549.3 | 291.2  | 35 | 15 |
| ALDH1A1 | IFINNEWHDSVSGK    | 24.9 | 549.3 | 693.3  | 35 | 15 |
| ALDH1A1 | IFINNEWHDSVSGK    | 24.9 | 549.3 | 636.8  | 35 | 15 |
| ALDH1A1 | IFINNEWHDSVSGK    | 24.9 | 551.9 | 697.3  | 35 | 15 |
| ALDH1A1 | IFINNEWHDSVSGK    | 24.9 | 551.9 | 640.8  | 35 | 15 |
| ALDH1A1 | IFVEESIYDEFVR     | 37.6 | 823.4 | 261.2  | 35 | 27 |
| ALDH1A1 | IFVEESIYDEFVR     | 37.6 | 823.4 | 360.2  | 35 | 27 |

|         |                     |      |        |        |    |    |
|---------|---------------------|------|--------|--------|----|----|
| ALDH1A1 | IFVEESYDEFVR        | 37.6 | 823.4  | 665.3  | 35 | 27 |
| ALDH1A1 | IFVEESYDEFVR        | 37.6 | 828.4  | 261.2  | 35 | 27 |
| ALDH1A1 | IFVEESYDEFVR        | 37.6 | 828.4  | 360.2  | 35 | 27 |
| ALDH1A2 | ANNSDFGLVAAVFTNDINK | 39.9 | 1005.5 | 1191.6 | 35 | 27 |
| ALDH1A2 | ANNSDFGLVAAVFTNDINK | 39.9 | 1005.5 | 1092.6 | 35 | 27 |
| ALDH1A2 | ANNSDFGLVAAVFTNDINK | 39.9 | 1005.5 | 1021.5 | 35 | 27 |
| ALDH1A2 | ANNSDFGLVAAVFTNDINK | 39.9 | 1005.5 | 950.5  | 35 | 27 |
| ALDH1A2 | ANNSDFGLVAAVFTNDINK | 39.9 | 1005.5 | 851.4  | 35 | 27 |
| ALDH1A2 | ANNSDFGLVAAVFTNDINK | 39.9 | 1009.5 | 1100.6 | 35 | 27 |
| ALDH1A2 | ANNSDFGLVAAVFTNDINK | 39.9 | 1009.5 | 859.4  | 35 | 27 |
| ALDH1A2 | IFINNEWQNSESGR      | 25.9 | 847.4  | 963.4  | 35 | 27 |
| ALDH1A2 | IFINNEWQNSESGR      | 25.9 | 847.4  | 777.3  | 35 | 27 |
| ALDH1A2 | IFINNEWQNSESGR      | 25.9 | 847.4  | 535.2  | 35 | 27 |
| ALDH1A2 | IFINNEWQNSESGR      | 25.9 | 847.4  | 319.2  | 35 | 27 |
| ALDH1A2 | IFINNEWQNSESGR      | 25.9 | 847.4  | 717.3  | 35 | 27 |
| ALDH1A2 | IFINNEWQNSESGR      | 25.9 | 852.4  | 787.4  | 35 | 27 |
| ALDH1A2 | IFINNEWQNSESGR      | 25.9 | 852.4  | 329.2  | 35 | 27 |
| ALDH1A2 | ILELIQSGVAEGAK      | 28.9 | 714.4  | 846.4  | 35 | 18 |
| ALDH1A2 | ILELIQSGVAEGAK      | 28.9 | 714.4  | 631.3  | 35 | 18 |
| ALDH1A2 | ILELIQSGVAEGAK      | 28.9 | 714.4  | 475.3  | 35 | 18 |
| ALDH1A2 | ILELIQSGVAEGAK      | 28.9 | 718.4  | 854.4  | 35 | 18 |
| ALDH1A2 | ILELIQSGVAEGAK      | 28.9 | 718.4  | 639.4  | 35 | 18 |
| ALDH1A3 | AVEAAQVAFQR         | 20.9 | 595.3  | 819.4  | 35 | 15 |
| ALDH1A3 | AVEAAQVAFQR         | 20.9 | 595.3  | 748.4  | 35 | 15 |
| ALDH1A3 | AVEAAQVAFQR         | 20.9 | 595.3  | 450.2  | 35 | 15 |
| ALDH1A3 | AVEAAQVAFQR         | 20.9 | 600.3  | 531.3  | 35 | 15 |
| ALDH1A3 | AVEAAQVAFQR         | 20.9 | 600.3  | 460.3  | 35 | 15 |
| ALDH1A3 | LLHQLADLVER         | 29.0 | 436.3  | 631.3  | 35 | 11 |
| ALDH1A3 | LLHQLADLVER         | 29.0 | 436.3  | 403.2  | 35 | 11 |
| ALDH1A3 | LLHQLADLVER         | 29.0 | 436.3  | 304.2  | 35 | 11 |
| ALDH1A3 | LLHQLADLVER         | 29.0 | 439.6  | 413.2  | 35 | 11 |
| ALDH1A3 | LLHQLADLVER         | 29.0 | 439.6  | 314.2  | 35 | 11 |
| AOX1    | GLHGPLTLNSPLTPEK    | 27.9 | 837.5  | 1301.7 | 35 | 31 |
| AOX1    | GLHGPLTLNSPLTPEK    | 27.9 | 837.5  | 1366.8 | 35 | 31 |
| AOX1    | GLHGPLTLNSPLTPEK    | 27.9 | 837.5  | 1309.7 | 35 | 31 |
| AOX1    | GLHGPLTLNSPLTPEK    | 27.9 | 837.5  | 373.2  | 35 | 31 |
| AOX1    | GLHGPLTLNSPLTPEK    | 27.9 | 841.5  | 1301.7 | 35 | 31 |
| AOX1    | GLHGPLTLNSPLTPEK    | 27.9 | 841.5  | 1374.8 | 35 | 31 |
| AOX1    | GLHGPLTLNSPLTPEK    | 27.9 | 841.5  | 1317.8 | 35 | 31 |
| AOX1    | GLHGPLTLNSPLTPEK    | 27.9 | 841.5  | 381.2  | 35 | 31 |
| AOX1    | LILNEVSLLGSAPGGK    | 34.2 | 784.5  | 886.5  | 35 | 30 |
| AOX1    | LILNEVSLLGSAPGGK    | 34.2 | 784.5  | 573.3  | 35 | 30 |
| AOX1    | LILNEVSLLGSAPGGK    | 34.2 | 784.5  | 358.2  | 35 | 30 |
| AOX1    | LILNEVSLLGSAPGGK    | 34.2 | 788.5  | 581.3  | 35 | 30 |
| AOX1    | LILNEVSLLGSAPGGK    | 34.2 | 788.5  | 366.2  | 35 | 30 |
| CES1    | AGQLLSELFTR         | 35.9 | 674.9  | 257.1  | 35 | 26 |
| CES1    | AGQLLSELFTR         | 35.9 | 674.9  | 370.2  | 35 | 26 |
| CES1    | AGQLLSELFTR         | 35.9 | 674.9  | 866.4  | 35 | 26 |
| CES1    | AGQLLSELFTR         | 35.9 | 679.9  | 257.1  | 35 | 26 |
| CES1    | AGQLLSELFTR         | 35.9 | 679.9  | 370.2  | 35 | 26 |

|        |                        |      |       |        |    |    |
|--------|------------------------|------|-------|--------|----|----|
| CES1   | AISESGVALTSVLVK        | 31.2 | 737.4 | 830.5  | 35 | 20 |
| CES1   | AISESGVALTSVLVK        | 31.2 | 737.4 | 759.5  | 35 | 20 |
| CES1   | AISESGVALTSVLVK        | 31.2 | 737.4 | 646.4  | 35 | 20 |
| CES1   | AISESGVALTSVLVK        | 31.2 | 741.4 | 838.5  | 35 | 20 |
| CES1   | AISESGVALTSVLVK        | 31.2 | 741.4 | 767.5  | 35 | 20 |
| CES1   | EGYLQIGANTQAAQK        | 22.5 | 796.4 | 350.1  | 35 | 30 |
| CES1   | EGYLQIGANTQAAQK        | 22.5 | 796.4 | 888.5  | 35 | 30 |
| CES1   | EGYLQIGANTQAAQK        | 22.5 | 796.4 | 417.2  | 35 | 30 |
| CES1   | EGYLQIGANTQAAQK        | 22.5 | 800.4 | 350.1  | 35 | 30 |
| CES1   | EGYLQIGANTQAAQK        | 22.5 | 800.4 | 896.5  | 35 | 30 |
| CES2   | ADHGDELPFVFR           | 32.4 | 701.8 | 1079.6 | 35 | 27 |
| CES2   | ADHGDELPFVFR           | 32.4 | 701.8 | 665.4  | 35 | 27 |
| CES2   | ADHGDELPFVFR           | 32.4 | 701.8 | 322.2  | 35 | 27 |
| CES2   | ADHGDELPFVFR           | 32.4 | 706.8 | 675.4  | 35 | 27 |
| CES2   | ADHGDELPFVFR           | 32.4 | 706.8 | 332.2  | 35 | 27 |
| CES2   | FTEEEQLSR              | 17.4 | 634.3 | 761.4  | 35 | 21 |
| CES2   | FTEEEQLSR              | 17.4 | 634.3 | 375.2  | 35 | 21 |
| CES2   | FTEEEQLSR              | 17.4 | 634.3 | 262.2  | 35 | 21 |
| CES2   | FTEEEQLSR              | 17.4 | 639.3 | 771.4  | 35 | 21 |
| CES2   | FTEEEQLSR              | 17.4 | 639.3 | 272.2  | 35 | 21 |
| CES2   | TTHTGQVLGSLVHVK        | 23.0 | 788.9 | 739.4  | 35 | 30 |
| CES2   | TTHTGQVLGSLVHVK        | 23.0 | 788.9 | 383.2  | 35 | 30 |
| CES2   | TTHTGQVLGSLVHVK        | 23.0 | 788.9 | 687.9  | 35 | 30 |
| CES2   | TTHTGQVLGSLVHVK        | 23.0 | 793.0 | 391.3  | 35 | 30 |
| CES2   | TTHTGQVLGSLVHVK        | 23.0 | 793.0 | 691.9  | 35 | 30 |
| CYP1A1 | HSSFPFTIPHSTTR         | 26.6 | 429.2 | 225.1  | 35 | 8  |
| CYP1A1 | HSSFPFTIPHSTTR         | 26.6 | 429.2 | 558.3  | 35 | 8  |
| CYP1A1 | HSSFPFTIPHSTTR         | 26.6 | 429.2 | 698.4  | 35 | 8  |
| CYP1A1 | HSSFPFTIPHSTTR         | 26.6 | 429.2 | 578.8  | 35 | 8  |
| CYP1A1 | HSSFPFTIPHSTTR         | 26.6 | 429.2 | 349.7  | 35 | 8  |
| CYP1A1 | HSSFPFTIPHSTTR         | 26.6 | 429.2 | 386.2  | 35 | 8  |
| CYP1A1 | HSSFPFTIPHSTTR         | 26.6 | 431.7 | 583.8  | 35 | 8  |
| CYP1A1 | HSSFPFTIPHSTTR         | 26.6 | 431.7 | 389.5  | 35 | 8  |
| CYP1A1 | IQEELDTVIGR            | 25.6 | 636.8 | 371.2  | 35 | 21 |
| CYP1A1 | IQEELDTVIGR            | 25.6 | 636.8 | 660.4  | 35 | 21 |
| CYP1A1 | IQEELDTVIGR            | 25.6 | 636.8 | 345.2  | 35 | 21 |
| CYP1A1 | IQEELDTVIGR            | 25.6 | 641.8 | 1041.5 | 35 | 21 |
| CYP1A1 | IQEELDTVIGR            | 25.6 | 641.8 | 355.2  | 35 | 21 |
| CYP1A2 | FLTADGTAINKPLSEK       | 22.7 | 853.0 | 815.5  | 35 | 31 |
| CYP1A2 | FLTADGTAINKPLSEK       | 22.7 | 853.0 | 573.3  | 35 | 31 |
| CYP1A2 | FLTADGTAINKPLSEK       | 22.7 | 853.0 | 579.3  | 35 | 31 |
| CYP1A2 | FLTADGTAINKPLSEK       | 22.7 | 857.0 | 581.3  | 35 | 31 |
| CYP1A2 | FLTADGTAINKPLSEK       | 22.7 | 857.0 | 583.3  | 35 | 31 |
| CYP1A2 | IGSTPVLVLSR            | 27.3 | 571.4 | 783.5  | 35 | 19 |
| CYP1A2 | IGSTPVLVLSR            | 27.3 | 571.4 | 375.2  | 35 | 19 |
| CYP1A2 | IGSTPVLVLSR            | 27.3 | 571.4 | 392.3  | 35 | 19 |
| CYP1A2 | IGSTPVLVLSR            | 27.3 | 576.4 | 793.5  | 35 | 19 |
| CYP1A2 | IGSTPVLVLSR            | 27.3 | 576.4 | 397.3  | 35 | 19 |
| CYP1A2 | NTHEFVETASSGNPLDFFPILR | 42.6 | 831.1 | 1117.6 | 35 | 21 |
| CYP1A2 | NTHEFVETASSGNPLDFFPILR | 42.6 | 831.1 | 645.4  | 35 | 21 |

|         |                                |      |        |        |    |    |
|---------|--------------------------------|------|--------|--------|----|----|
| CYP1A2  | NTHEFVETASSGNPLDFFPILR         | 42.6 | 831.1  | 498.3  | 35 | 21 |
| CYP1A2  | NTHEFVETASSGNPLDFFPIL <u>R</u> | 42.6 | 834.4  | 655.4  | 35 | 21 |
| CYP1A2  | NTHEFVETASSGNPLDFFPIL <u>R</u> | 42.6 | 834.4  | 508.3  | 35 | 21 |
| CYP2A6  | DPSFFSNPQDFNPQHFLNEK           | 36.7 | 1204.6 | 1012.5 | 35 | 33 |
| CYP2A6  | DPSFFSNPQDFNPQHFLNEK           | 36.7 | 1204.6 | 787.4  | 35 | 33 |
| CYP2A6  | DPSFFSNPQDFNPQHFLNEK           | 36.7 | 1204.6 | 650.4  | 35 | 33 |
| CYP2A6  | DPSFFSNPQDFNPQHFLNEK           | 36.7 | 1204.6 | 1147.0 | 35 | 33 |
| CYP2A6  | DPSFFSNPQDFNPQHFLNE <u>K</u>   | 36.7 | 1208.6 | 1020.5 | 35 | 33 |
| CYP2A6  | DPSFFSNPQDFNPQHFLNE <u>K</u>   | 36.7 | 1208.6 | 795.4  | 35 | 33 |
| CYP2A6  | DPSFFSNPQDFNPQHFLNE <u>K</u>   | 36.7 | 1208.6 | 658.4  | 35 | 33 |
| CYP2A6  | DPSFFSNPQDFNPQHFLNE <u>K</u>   | 36.7 | 1208.6 | 1151.0 | 35 | 33 |
| CYP2A6  | GTGGANIDPTFFLSR                | 33.8 | 776.9  | 982.5  | 35 | 29 |
| CYP2A6  | GTGGANIDPTFFLSR                | 33.8 | 776.9  | 867.5  | 35 | 29 |
| CYP2A6  | GTGGANIDPTFFLSR                | 33.8 | 776.9  | 522.3  | 35 | 29 |
| CYP2A6  | GTGGANIDPTFFLS <u>R</u>        | 33.8 | 781.9  | 992.5  | 35 | 29 |
| CYP2A6  | GTGGANIDPTFFLS <u>R</u>        | 33.8 | 781.9  | 877.5  | 35 | 29 |
| CYP2B6  | GYGVIFANGNR                    | 25.5 | 584.3  | 221.1  | 35 | 23 |
| CYP2B6  | GYGVIFANGNR                    | 25.5 | 584.3  | 278.1  | 35 | 23 |
| CYP2B6  | GYGVIFANGNR                    | 25.5 | 584.3  | 678.3  | 35 | 23 |
| CYP2B6  | GYGVIFANG <u>N</u> R           | 25.5 | 589.3  | 221.1  | 35 | 23 |
| CYP2B6  | GYGVIFANG <u>N</u> R           | 25.5 | 589.3  | 278.1  | 35 | 23 |
| CYP2B6  | IQEEAQCLIEELR                  | 32.8 | 815.9  | 242.1  | 35 | 26 |
| CYP2B6  | IQEEAQCLIEELR                  | 32.8 | 815.9  | 932.5  | 35 | 26 |
| CYP2B6  | IQEEAQCLIEELR                  | 32.8 | 815.9  | 288.2  | 35 | 26 |
| CYP2B6  | IQEEAQCLIEEL <u>R</u>          | 32.8 | 820.9  | 242.1  | 35 | 26 |
| CYP2B6  | IQEEAQCLIEEL <u>R</u>          | 32.8 | 820.9  | 556.3  | 35 | 26 |
| CYP2B6  | TEAFIPFSLGK                    | 35.1 | 605.3  | 302.1  | 35 | 20 |
| CYP2B6  | TEAFIPFSLGK                    | 35.1 | 605.3  | 979.6  | 35 | 20 |
| CYP2B6  | TEAFIPFSLGK                    | 35.1 | 605.3  | 648.4  | 35 | 20 |
| CYP2B6  | TEAFIPFSLG <u>K</u>            | 35.1 | 609.3  | 302.1  | 35 | 20 |
| CYP2B6  | TEAFIPFSLG <u>K</u>            | 35.1 | 609.3  | 656.4  | 35 | 20 |
| CYP2C18 | EALIDHGEEFSGR                  | 20.4 | 487.2  | 319.2  | 35 | 10 |
| CYP2C18 | EALIDHGEEFSGR                  | 20.4 | 487.2  | 630.3  | 35 | 10 |
| CYP2C18 | EALIDHGEEFSGR                  | 20.4 | 487.2  | 573.8  | 35 | 10 |
| CYP2C18 | EALIDHGEEFSG <u>R</u>          | 20.4 | 490.6  | 578.8  | 35 | 10 |
| CYP2C18 | EALIDHGEEFSG <u>R</u>          | 20.4 | 490.6  | 522.2  | 35 | 10 |
| CYP2C18 | GTTIITSLTSVLHNDK               | 35.0 | 567.3  | 626.3  | 35 | 16 |
| CYP2C18 | GTTIITSLTSVLHNDK               | 35.0 | 567.3  | 513.2  | 35 | 16 |
| CYP2C18 | GTTIITSLTSVLHNDK               | 35.0 | 567.3  | 771.4  | 35 | 16 |
| CYP2C18 | GTTIITSLTSVLHNDK               | 35.0 | 567.3  | 607.8  | 35 | 16 |
| CYP2C18 | GTTIITSLTSVLHND <u>K</u>       | 35.0 | 570.0  | 521.3  | 35 | 16 |
| CYP2C18 | GTTIITSLTSVLHND <u>K</u>       | 35.0 | 570.0  | 611.8  | 35 | 16 |
| CYP2C19 | GTTILTSLTSVLHDNK               | 35.0 | 567.3  | 513.2  | 35 | 20 |
| CYP2C19 | GTTILTSLTSVLHDNK               | 35.0 | 567.3  | 664.4  | 35 | 20 |
| CYP2C19 | GTTILTSLTSVLHDNK               | 35.0 | 567.3  | 607.8  | 35 | 20 |
| CYP2C19 | GTTILTSLTSVLHDN <u>K</u>       | 35.0 | 570.0  | 521.3  | 35 | 20 |
| CYP2C19 | GTTILTSLTSVLHDN <u>K</u>       | 35.0 | 570.0  | 668.4  | 35 | 20 |
| CYP2C19 | HFLDEGGNFK                     | 21.1 | 388.5  | 522.3  | 35 | 7  |
| CYP2C19 | HFLDEGGNFK                     | 21.1 | 388.5  | 465.2  | 35 | 7  |
| CYP2C19 | HFLDEGGNFK                     | 21.1 | 388.5  | 261.6  | 35 | 7  |

|         |                    |      |        |        |    |    |
|---------|--------------------|------|--------|--------|----|----|
| CYP2C19 | HFLDEGGNFK         | 21.1 | 391.2  | 530.3  | 35 | 7  |
| CYP2C19 | HFLDEGGNFK         | 21.1 | 391.2  | 265.6  | 35 | 7  |
| CYP2C8  | VQEEIDHVIGR        | 20.5 | 647.8  | 1067.5 | 35 | 26 |
| CYP2C8  | VQEEIDHVIGR        | 20.5 | 647.8  | 581.4  | 35 | 26 |
| CYP2C8  | VQEEIDHVIGR        | 20.5 | 647.8  | 232.1  | 35 | 26 |
| CYP2C8  | VQEEIDHVIGR        | 20.5 | 652.8  | 591.4  | 35 | 26 |
| CYP2C8  | VQEEIDHVIGR        | 20.5 | 652.8  | 242.1  | 35 | 26 |
| CYP2C8  | YSDLVPTGVPHAVTTDTK | 24.1 | 634.3  | 578.3  | 35 | 14 |
| CYP2C8  | YSDLVPTGVPHAVTTDTK | 24.1 | 634.3  | 711.9  | 35 | 14 |
| CYP2C8  | YSDLVPTGVPHAVTTDTK | 24.1 | 634.3  | 662.3  | 35 | 14 |
| CYP2C8  | YSDLVPTGVPHAVTTDTK | 24.1 | 637.0  | 578.3  | 35 | 14 |
| CYP2C8  | YSDLVPTGVPHAVTTDTK | 24.1 | 637.0  | 666.4  | 35 | 14 |
| CYP2C9  | GIFPLAER           | 29.7 | 451.8  | 585.3  | 35 | 10 |
| CYP2C9  | GIFPLAER           | 29.7 | 451.8  | 366.7  | 35 | 10 |
| CYP2C9  | GIFPLAER           | 29.7 | 451.8  | 293.2  | 35 | 10 |
| CYP2C9  | GIFPLAER           | 29.7 | 456.8  | 595.3  | 35 | 10 |
| CYP2C9  | GIFPLAER           | 29.7 | 456.8  | 371.7  | 35 | 10 |
| CYP2C9  | YIDLLPTSLPHAVTCDIK | 34.8 | 1028.5 | 1040.5 | 35 | 33 |
| CYP2C9  | YIDLLPTSLPHAVTCDIK | 34.8 | 1028.5 | 636.3  | 35 | 33 |
| CYP2C9  | YIDLLPTSLPHAVTCDIK | 34.8 | 1028.5 | 719.9  | 35 | 33 |
| CYP2C9  | YIDLLPTSLPHAVTCDIK | 34.8 | 1032.5 | 1048.5 | 35 | 33 |
| CYP2C9  | YIDLLPTSLPHAVTCDIK | 34.8 | 1032.5 | 723.9  | 35 | 33 |
| CYP2D6  | GTTLITNLSSVLK      | 33.0 | 673.9  | 974.6  | 35 | 22 |
| CYP2D6  | GTTLITNLSSVLK      | 29.7 | 673.9  | 861.5  | 35 | 22 |
| CYP2D6  | GTTLITNLSSVLK      | 29.7 | 673.9  | 760.5  | 35 | 22 |
| CYP2D6  | GTTLITNLSSVLK      | 29.7 | 673.9  | 646.4  | 35 | 22 |
| CYP2D6  | GTTLITNLSSVLK      | 29.7 | 673.9  | 533.3  | 35 | 22 |
| CYP2D6  | GTTLITNLSSVLK      | 29.7 | 677.9  | 982.6  | 35 | 22 |
| CYP2D6  | GTTLITNLSSVLK      | 29.7 | 677.9  | 869.5  | 35 | 22 |
| CYP2D6  | GTTLITNLSSVLK      | 29.7 | 677.9  | 768.5  | 35 | 22 |
| CYP2D6  | GTTLITNLSSVLK      | 29.7 | 677.9  | 654.4  | 35 | 22 |
| CYP2D6  | GTTLITNLSSVLK      | 29.7 | 677.9  | 541.3  | 35 | 22 |
| CYP2D6  | VQQEIDDVIGQVR      | 27.1 | 749.9  | 1271.7 | 35 | 19 |
| CYP2D6  | VQQEIDDVIGQVR      | 27.1 | 749.9  | 572.4  | 35 | 19 |
| CYP2D6  | VQQEIDDVIGQVR      | 27.1 | 749.9  | 459.3  | 35 | 19 |
| CYP2D6  | VQQEIDDVIGQVR      | 27.1 | 754.9  | 582.4  | 35 | 19 |
| CYP2D6  | VQQEIDDVIGQVR      | 27.1 | 754.9  | 469.3  | 35 | 19 |
| CYP2E1  | FGPVFTLYVGSQR      | 35.8 | 735.9  | 709.4  | 35 | 20 |
| CYP2E1  | FGPVFTLYVGSQR      | 35.8 | 735.9  | 447.2  | 35 | 20 |
| CYP2E1  | FGPVFTLYVGSQR      | 35.8 | 735.9  | 633.8  | 35 | 20 |
| CYP2E1  | FGPVFTLYVGSQR      | 35.8 | 740.9  | 457.2  | 35 | 20 |
| CYP2E1  | FGPVFTLYVGSQR      | 35.8 | 740.9  | 638.8  | 35 | 20 |
| CYP2E1  | FITLVPSNLPHEATR    | 29.2 | 848.0  | 574.4  | 35 | 27 |
| CYP2E1  | FITLVPSNLPHEATR    | 29.2 | 848.0  | 1121.6 | 35 | 27 |
| CYP2E1  | FITLVPSNLPHEATR    | 29.2 | 848.0  | 561.3  | 35 | 27 |
| CYP2E1  | FITLVPSNLPHEATR    | 29.2 | 853.0  | 1131.6 | 35 | 27 |
| CYP2E1  | FITLVPSNLPHEATR    | 29.2 | 853.0  | 566.3  | 35 | 27 |
| CYP2J2  | LLDEVTYLEASK       | 29.0 | 690.9  | 1154.6 | 35 | 22 |
| CYP2J2  | LLDEVTYLEASK       | 29.0 | 690.9  | 910.5  | 35 | 22 |
| CYP2J2  | LLDEVTYLEASK       | 29.0 | 690.9  | 811.4  | 35 | 22 |



|         |                               |      |       |        |    |    |
|---------|-------------------------------|------|-------|--------|----|----|
| CYP2J2  | LLDEVTYLEASK                  | 29.0 | 690.9 | 710.4  | 35 | 22 |
| CYP2J2  | LLDEVTYLEASK                  | 29.0 | 690.9 | 434.2  | 35 | 22 |
| CYP2J2  | LLDEVTYLEASK <u>K</u>         | 29.0 | 694.9 | 1162.6 | 35 | 22 |
| CYP2J2  | LLDEVTYLEASK <u>K</u>         | 29.0 | 694.9 | 819.4  | 35 | 22 |
| CYP2J2  | VIGQGQQPSTAAR                 | 12.5 | 656.9 | 915.5  | 35 | 25 |
| CYP2J2  | VIGQGQQPSTAAR                 | 12.5 | 656.9 | 602.3  | 35 | 25 |
| CYP2J2  | VIGQGQQPSTAAR                 | 12.5 | 656.9 | 550.8  | 35 | 25 |
| CYP2J2  | VIGQGQQPSTAAR <u>R</u>        | 12.5 | 661.9 | 612.3  | 35 | 25 |
| CYP2J2  | VIGQGQQPSTAAR <u>R</u>        | 12.5 | 661.9 | 612.3  | 35 | 25 |
| CYP3A4  | EVTNFLR                       | 23.8 | 439.7 | 229.1  | 35 | 15 |
| CYP3A4  | EVTNFLR                       | 23.8 | 439.7 | 330.2  | 35 | 15 |
| CYP3A4  | EVTNFLR                       | 23.8 | 439.7 | 650.4  | 35 | 15 |
| CYP3A4  | EVTNFLR <u>R</u>              | 23.8 | 444.7 | 229.1  | 35 | 15 |
| CYP3A4  | EVTNFLR <u>R</u>              | 23.8 | 444.7 | 660.4  | 35 | 15 |
| CYP3A4  | LGIPGPTPLPFLGNILSYHK          | 36.0 | 712.1 | 284.2  | 35 | 17 |
| CYP3A4  | LGIPGPTPLPFLGNILSYHK          | 36.0 | 712.1 | 846.5  | 35 | 17 |
| CYP3A4  | LGIPGPTPLPFLGNILSYHK          | 36.0 | 712.1 | 1044.6 | 35 | 17 |
| CYP3A4  | LGIPGPTPLPFLGNILSYHK          | 36.0 | 712.1 | 931.5  | 35 | 17 |
| CYP3A4  | LGIPGPTPLPFLGNILSYHK <u>K</u> | 36.0 | 714.7 | 284.2  | 35 | 17 |
| CYP3A4  | LGIPGPTPLPFLGNILSYHK <u>K</u> | 36.0 | 714.7 | 846.5  | 35 | 17 |
| CYP3A4  | LGIPGPTPLPFLGNILSYHK <u>K</u> | 36.0 | 714.7 | 1052.6 | 35 | 17 |
| CYP3A4  | LGIPGPTPLPFLGNILSYHK <u>K</u> | 36.0 | 714.7 | 939.5  | 35 | 17 |
| CYP3A4  | LSLGLLQPEKPVVLK               | 36.0 | 846.0 | 909.6  | 35 | 24 |
| CYP3A4  | LSLGLLQPEKPVVLK               | 36.0 | 846.0 | 689.4  | 35 | 24 |
| CYP3A4  | LSLGLLQPEKPVVLK               | 36.0 | 564.4 | 746.0  | 35 | 13 |
| CYP3A4  | LSLGLLQPEKPVVLK <u>K</u>      | 36.0 | 850.0 | 917.6  | 35 | 24 |
| CYP3A4  | LSLGLLQPEKPVVLK <u>K</u>      | 36.0 | 850.0 | 750.0  | 35 | 24 |
| CYP3A4  | LSLGLLQPEKPVVLK <u>K</u>      | 36.0 | 850.0 | 693.4  | 35 | 24 |
| CYP3A4  | LSLGLLQPEKPVVLK <u>K</u>      | 36.0 | 567.0 | 750.0  | 35 | 13 |
| CYP3A43 | DIEINGVFIPK                   | 31.8 | 622.8 | 229.1  | 35 | 20 |
| CYP3A43 | DIEINGVFIPK                   | 31.8 | 622.8 | 358.2  | 35 | 20 |
| CYP3A43 | DIEINGVFIPK                   | 31.8 | 622.8 | 1016.6 | 35 | 20 |
| CYP3A43 | DIEINGVFIPK                   | 31.8 | 622.8 | 887.5  | 35 | 20 |
| CYP3A43 | DIEINGVFIPK                   | 31.8 | 622.8 | 774.5  | 35 | 20 |
| CYP3A43 | DIEINGVFIPK                   | 31.8 | 622.8 | 244.2  | 35 | 20 |
| CYP3A43 | DIEINGVFIPK <u>K</u>          | 31.8 | 626.9 | 229.1  | 35 | 20 |
| CYP3A43 | DIEINGVFIPK <u>K</u>          | 31.8 | 626.9 | 252.2  | 35 | 20 |
| CYP3A43 | LDNLPILQPEKPIVLK              | 32.4 | 610.7 | 229.1  | 35 | 17 |
| CYP3A43 | LDNLPILQPEKPIVLK              | 32.4 | 610.7 | 687.9  | 35 | 17 |
| CYP3A43 | LDNLPILQPEKPIVLK              | 32.4 | 610.7 | 462.3  | 35 | 17 |
| CYP3A43 | LDNLPILQPEKPIVLK <u>K</u>     | 32.4 | 613.4 | 229.1  | 35 | 17 |
| CYP3A43 | LDNLPILQPEKPIVLK <u>K</u>     | 32.4 | 613.4 | 691.9  | 35 | 17 |
| CYP3A43 | TLLSPAFTSVK                   | 29.1 | 582.3 | 215.1  | 35 | 14 |
| CYP3A43 | TLLSPAFTSVK                   | 29.1 | 582.3 | 328.2  | 35 | 14 |
| CYP3A43 | TLLSPAFTSVK                   | 29.1 | 582.3 | 949.5  | 35 | 14 |
| CYP3A43 | TLLSPAFTSVK                   | 29.1 | 582.3 | 836.5  | 35 | 14 |
| CYP3A43 | TLLSPAFTSVK                   | 29.1 | 582.3 | 749.4  | 35 | 14 |
| CYP3A43 | TLLSPAFTSVK <u>K</u>          | 29.1 | 586.3 | 215.1  | 35 | 14 |
| CYP3A43 | TLLSPAFTSVK <u>K</u>          | 29.1 | 586.3 | 328.2  | 35 | 14 |
| CYP3A5  | DSIDPYYITPFGTGPR              | 34.7 | 899.9 | 1368.7 | 35 | 29 |

|        |                     |      |        |        |    |    |
|--------|---------------------|------|--------|--------|----|----|
| CYP3A5 | DSIDPYIYTPFGTGPR    | 34.7 | 899.9  | 995.5  | 35 | 29 |
| CYP3A5 | DSIDPYIYTPFGTGPR    | 34.7 | 899.9  | 832.4  | 35 | 29 |
| CYP3A5 | DSIDPYIYTPFGTGPR    | 34.7 | 899.9  | 731.4  | 35 | 29 |
| CYP3A5 | DSIDPYIYTPFGTGPR    | 34.7 | 904.9  | 1378.7 | 35 | 29 |
| CYP3A5 | DSIDPYIYTPFGTGPR    | 34.7 | 904.9  | 1005.5 | 35 | 29 |
| CYP3A5 | DSIDPYIYTPFGTGPR    | 34.7 | 904.9  | 842.4  | 35 | 29 |
| CYP3A5 | DSIDPYIYTPFGTGPR    | 34.7 | 904.9  | 741.4  | 35 | 29 |
| CYP3A5 | DVEINGVFIPK         | 29.9 | 615.8  | 1016.6 | 35 | 16 |
| CYP3A5 | DVEINGVFIPK         | 29.9 | 615.8  | 887.5  | 35 | 16 |
| CYP3A5 | DVEINGVFIPK         | 29.9 | 615.8  | 774.5  | 35 | 16 |
| CYP3A5 | DVEINGVFIPK         | 29.9 | 615.8  | 504.3  | 35 | 16 |
| CYP3A5 | DVEINGVFIPK         | 29.9 | 615.8  | 244.2  | 35 | 16 |
| CYP3A5 | DVEINGVFIPK         | 29.9 | 619.8  | 782.5  | 35 | 16 |
| CYP3A5 | DVEINGVFIPK         | 29.9 | 619.8  | 252.2  | 35 | 16 |
| CYP3A5 | LDTQGLLQPEKPIVLK    | 28.9 | 896.5  | 741.4  | 35 | 33 |
| CYP3A5 | LDTQGLLQPEKPIVLK    | 28.9 | 896.5  | 869.5  | 35 | 33 |
| CYP3A5 | LDTQGLLQPEKPIVLK    | 28.9 | 896.5  | 1334.8 | 35 | 33 |
| CYP3A5 | LDTQGLLQPEKPIVLK    | 28.9 | 896.5  | 923.6  | 35 | 33 |
| CYP3A5 | LDTQGLLQPEKPIVLK    | 28.9 | 896.5  | 569.4  | 35 | 33 |
| CYP3A5 | LDTQGLLQPEKPIVLK    | 28.9 | 900.5  | 931.6  | 35 | 33 |
| CYP3A5 | LDTQGLLQPEKPIVLK    | 28.9 | 900.5  | 577.4  | 35 | 33 |
| CYP3A7 | FGGLLLTEKPIVLK      | 33.2 | 764.5  | 375.2  | 35 | 30 |
| CYP3A7 | FGGLLLTEKPIVLK      | 33.2 | 764.5  | 488.3  | 35 | 30 |
| CYP3A7 | FGGLLLTEKPIVLK      | 33.2 | 764.5  | 1040.7 | 35 | 30 |
| CYP3A7 | FGGLLLTEKPIVLK      | 33.2 | 764.5  | 927.6  | 35 | 30 |
| CYP3A7 | FGGLLLTEKPIVLK      | 33.2 | 764.5  | 569.4  | 35 | 30 |
| CYP3A7 | FGGLLLTEKPIVLK      | 33.2 | 764.5  | 260.2  | 35 | 30 |
| CYP3A7 | FGGLLLTEKPIVLK      | 33.2 | 768.5  | 375.2  | 35 | 30 |
| CYP3A7 | FGGLLLTEKPIVLK      | 33.2 | 768.5  | 268.2  | 35 | 30 |
| CYP3A7 | FNPLDPFVLSIK        | 42.2 | 695.4  | 262.1  | 35 | 23 |
| CYP3A7 | FNPLDPFVLSIK        | 42.2 | 695.4  | 803.5  | 35 | 23 |
| CYP3A7 | FNPLDPFVLSIK        | 42.2 | 695.4  | 347.2  | 35 | 23 |
| CYP3A7 | FNPLDPFVLSIK        | 42.2 | 699.4  | 262.1  | 35 | 23 |
| CYP3A7 | FNPLDPFVLSIK        | 42.2 | 699.4  | 568.8  | 35 | 23 |
| CYP3A7 | LGIPGPTPLPFLGNALSFR | 42.6 | 984.1  | 1331.7 | 35 | 27 |
| CYP3A7 | LGIPGPTPLPFLGNALSFR | 42.6 | 984.1  | 1121.6 | 35 | 27 |
| CYP3A7 | LGIPGPTPLPFLGNALSFR | 42.6 | 984.1  | 764.4  | 35 | 27 |
| CYP3A7 | LGIPGPTPLPFLGNALSFR | 42.6 | 984.1  | 409.2  | 35 | 27 |
| CYP3A7 | LGIPGPTPLPFLGNALSFR | 42.6 | 989.1  | 1131.6 | 35 | 27 |
| CYP3A7 | LGIPGPTPLPFLGNALSFR | 42.6 | 989.1  | 419.2  | 35 | 27 |
| DPYD   | LTPNVTDIVSIAR       | 32.0 | 699.9  | 874.5  | 35 | 19 |
| DPYD   | LTPNVTDIVSIAR       | 32.0 | 699.9  | 446.3  | 35 | 19 |
| DPYD   | LTPNVTDIVSIAR       | 32.0 | 699.9  | 592.8  | 35 | 19 |
| DPYD   | LTPNVTDIVSIAR       | 32.0 | 704.9  | 884.5  | 35 | 19 |
| DPYD   | LTPNVTDIVSIAR       | 32.0 | 704.9  | 597.8  | 35 | 19 |
| EPHX1  | GGHFAAFEPELLAQDIR   | 34.3 | 1000.5 | 252.1  | 35 | 35 |
| EPHX1  | GGHFAAFEPELLAQDIR   | 34.3 | 667.3  | 602.3  | 35 | 22 |
| EPHX1  | GGHFAAFEPELLAQDIR   | 34.3 | 667.3  | 288.2  | 35 | 22 |
| EPHX1  | GGHFAAFEPELLAQDIR   | 34.3 | 670.7  | 612.3  | 35 | 22 |
| EPHX1  | GGHFAAFEPELLAQDIR   | 34.3 | 670.7  | 298.2  | 35 | 22 |

|       |                     |      |        |        |    |    |
|-------|---------------------|------|--------|--------|----|----|
| EPHX1 | VETSDEEIHDLHQR      | 15.1 | 427.7  | 689.8  | 35 | 15 |
| EPHX1 | VETSDEEIHDLHQR      | 15.1 | 427.7  | 459.7  | 35 | 15 |
| EPHX1 | VETSDEEIHDLHQR      | 15.1 | 427.7  | 403.2  | 35 | 15 |
| EPHX1 | VETSDEEIHDLHQR      | 15.1 | 430.2  | 651.3  | 35 | 15 |
| EPHX1 | VETSDEEIHDLHQR      | 15.1 | 430.2  | 408.2  | 35 | 15 |
| EPHX1 | YLEDGGLER           | 18.9 | 526.3  | 277.2  | 35 | 13 |
| EPHX1 | YLEDGGLER           | 18.9 | 526.3  | 775.4  | 35 | 13 |
| EPHX1 | YLEDGGLER           | 18.9 | 526.3  | 646.3  | 35 | 13 |
| EPHX1 | YLEDGGLER           | 18.9 | 531.3  | 277.2  | 35 | 13 |
| EPHX1 | YLEDGGLER           | 18.9 | 531.3  | 785.4  | 35 | 13 |
| EPHX2 | ASPSEVFLDDIGANLKPAR | 35.4 | 700.4  | 764.9  | 35 | 20 |
| EPHX2 | ASPSEVFLDDIGANLKPAR | 35.4 | 700.4  | 715.4  | 35 | 20 |
| EPHX2 | ASPSEVFLDDIGANLKPAR | 35.4 | 700.4  | 641.9  | 35 | 20 |
| EPHX2 | ASPSEVFLDDIGANLKPAR | 35.4 | 703.7  | 769.9  | 35 | 20 |
| EPHX2 | ASPSEVFLDDIGANLKPAR | 35.4 | 703.7  | 720.4  | 35 | 20 |
| EPHX2 | GLLNDAFQK           | 27.5 | 503.3  | 835.4  | 35 | 13 |
| EPHX2 | GLLNDAFQK           | 27.5 | 503.3  | 722.3  | 35 | 13 |
| EPHX2 | GLLNDAFQK           | 27.5 | 503.3  | 418.2  | 35 | 13 |
| EPHX2 | GLLNDAFQK           | 27.5 | 507.3  | 730.4  | 35 | 13 |
| EPHX2 | GLLNDAFQK           | 27.5 | 507.3  | 422.2  | 35 | 13 |
| EPHX2 | VCEAGGLFVNSPEEPSLSR | 28.6 | 1024.5 | 1115.5 | 35 | 33 |
| EPHX2 | VCEAGGLFVNSPEEPSLSR | 28.6 | 1024.5 | 914.5  | 35 | 33 |
| EPHX2 | VCEAGGLFVNSPEEPSLSR | 28.6 | 1024.5 | 559.3  | 35 | 33 |
| EPHX2 | VCEAGGLFVNSPEEPSLSR | 28.6 | 1029.5 | 924.5  | 35 | 33 |
| EPHX2 | VCEAGGLFVNSPEEPSLSR | 28.6 | 1029.5 | 569.3  | 35 | 33 |
| FMO1  | SDDLGLLWR           | 29.6 | 509.8  | 203.1  | 35 | 17 |
| FMO1  | SDDLGLLWR           | 29.6 | 509.8  | 318.1  | 35 | 17 |
| FMO1  | SDDLGLLWR           | 29.6 | 509.8  | 588.3  | 35 | 17 |
| FMO1  | SDDLGLLWR           | 29.6 | 514.8  | 318.1  | 35 | 17 |
| FMO1  | SDDLGLLWR           | 29.6 | 514.8  | 598.3  | 35 | 17 |
| FMO1  | VEDGQASLYK          | 15.8 | 555.3  | 229.1  | 35 | 18 |
| FMO1  | VEDGQASLYK          | 15.8 | 555.3  | 881.4  | 35 | 18 |
| FMO1  | VEDGQASLYK          | 15.8 | 555.3  | 310.2  | 35 | 18 |
| FMO1  | VEDGQASLYK          | 15.8 | 559.3  | 229.1  | 35 | 18 |
| FMO1  | VEDGQASLYK          | 15.8 | 559.3  | 889.5  | 35 | 18 |
| FMO2  | ASIYQSVVTNTSK       | 23.2 | 699.4  | 272.2  | 35 | 19 |
| FMO2  | ASIYQSVVTNTSK       | 23.2 | 699.4  | 1126.6 | 35 | 19 |
| FMO2  | ASIYQSVVTNTSK       | 23.2 | 699.4  | 835.5  | 35 | 19 |
| FMO2  | ASIYQSVVTNTSK       | 23.2 | 699.4  | 649.4  | 35 | 19 |
| FMO2  | ASIYQSVVTNTSK       | 23.2 | 699.4  | 550.3  | 35 | 19 |
| FMO2  | ASIYQSVVTNTSK       | 23.2 | 703.4  | 843.5  | 35 | 19 |
| FMO2  | ASIYQSVVTNTSK       | 23.2 | 703.4  | 657.4  | 35 | 19 |
| FMO2  | WFNHENYGLEPQNK      | 24.1 | 592.6  | 645.8  | 35 | 17 |
| FMO2  | WFNHENYGLEPQNK      | 24.1 | 592.6  | 785.4  | 35 | 17 |
| FMO2  | WFNHENYGLEPQNK      | 24.1 | 592.6  | 615.3  | 35 | 17 |
| FMO2  | WFNHENYGLEPQNK      | 24.1 | 592.6  | 486.3  | 35 | 17 |
| FMO2  | WFNHENYGLEPQNK      | 24.1 | 592.6  | 261.2  | 35 | 17 |
| FMO2  | WFNHENYGLEPQNK      | 24.1 | 595.3  | 494.3  | 35 | 17 |
| FMO2  | WFNHENYGLEPQNK      | 24.1 | 595.3  | 269.2  | 35 | 17 |
| FMO2  | YIFPAHLDK           | 24.4 | 368.5  | 277.2  | 35 | 9  |

|       |                 |      |       |        |    |    |
|-------|-----------------|------|-------|--------|----|----|
| FMO2  | YIFPAHLDK       | 24.4 | 368.5 | 414.2  | 35 | 9  |
| FMO2  | YIFPAHLDK       | 24.4 | 368.5 | 340.7  | 35 | 9  |
| FMO2  | YIFPAHLDK       | 24.4 | 371.2 | 418.2  | 35 | 9  |
| FMO2  | YIFPAHLDK       | 24.4 | 371.2 | 344.7  | 35 | 9  |
| FMO3  | LVGPGQWPGAR     | 24.5 | 569.3 | 400.2  | 35 | 15 |
| FMO3  | LVGPGQWPGAR     | 24.5 | 569.3 | 463.2  | 35 | 15 |
| FMO3  | LVGPGQWPGAR     | 24.5 | 569.3 | 434.7  | 35 | 15 |
| FMO3  | LVGPGQWPGAR     | 24.5 | 574.3 | 410.2  | 35 | 15 |
| FMO3  | LVGPGQWPGAR     | 24.5 | 574.3 | 468.2  | 35 | 15 |
| FMO3  | NNLPTAISDWLYVK  | 39.8 | 817.4 | 342.2  | 35 | 22 |
| FMO3  | NNLPTAISDWLYVK  | 39.8 | 817.4 | 1292.7 | 35 | 22 |
| FMO3  | NNLPTAISDWLYVK  | 39.8 | 817.4 | 646.8  | 35 | 22 |
| FMO3  | NNLPTAISDWLYVK  | 39.8 | 821.4 | 342.2  | 35 | 22 |
| FMO3  | NNLPTAISDWLYVK  | 39.8 | 821.4 | 1300.7 | 35 | 22 |
| FMO3  | VAIIGAGVSGLASIR | 32.1 | 692.4 | 987.6  | 35 | 19 |
| FMO3  | VAIIGAGVSGLASIR | 32.1 | 692.4 | 703.4  | 35 | 19 |
| FMO3  | VAIIGAGVSGLASIR | 32.1 | 692.4 | 550.8  | 35 | 19 |
| FMO3  | VAIIGAGVSGLASIR | 32.1 | 697.4 | 997.6  | 35 | 19 |
| FMO3  | VAIIGAGVSGLASIR | 32.1 | 697.4 | 713.4  | 35 | 19 |
| GSTA1 | LHYFNAR         | 17.7 | 460.7 | 251.2  | 35 | 15 |
| GSTA1 | LHYFNAR         | 17.7 | 460.7 | 670.3  | 35 | 15 |
| GSTA1 | LHYFNAR         | 17.7 | 460.7 | 404.2  | 35 | 15 |
| GSTA1 | LHYFNAR         | 17.7 | 465.7 | 251.2  | 35 | 15 |
| GSTA1 | LHYFNAR         | 17.7 | 465.7 | 680.3  | 35 | 15 |
| GSTA2 | LALIQEK         | 21.4 | 407.8 | 701.4  | 35 | 14 |
| GSTA2 | LALIQEK         | 21.4 | 407.8 | 630.4  | 35 | 14 |
| GSTA2 | LALIQEK         | 21.4 | 407.8 | 517.3  | 35 | 14 |
| GSTA2 | LALIQEK         | 21.4 | 411.8 | 709.4  | 35 | 14 |
| GSTA2 | LALIQEK         | 21.4 | 411.8 | 638.4  | 35 | 14 |
| GSTA2 | LHYSNIR         | 13.7 | 451.7 | 652.3  | 35 | 15 |
| GSTA2 | LHYSNIR         | 13.7 | 451.7 | 489.3  | 35 | 15 |
| GSTA2 | LHYSNIR         | 13.7 | 451.7 | 395.2  | 35 | 15 |
| GSTA2 | LHYSNIR         | 13.7 | 456.7 | 499.3  | 35 | 15 |
| GSTA2 | LHYSNIR         | 13.7 | 456.7 | 400.2  | 35 | 15 |
| GSTA3 | FIGSAEDLGK      | 21.1 | 518.8 | 632.3  | 35 | 12 |
| GSTA3 | FIGSAEDLGK      | 21.1 | 518.8 | 432.2  | 35 | 12 |
| GSTA3 | FIGSAEDLGK      | 21.1 | 518.8 | 204.1  | 35 | 12 |
| GSTA3 | FIGSAEDLGK      | 21.1 | 522.8 | 261.2  | 35 | 12 |
| GSTA3 | FIGSAEDLGK      | 21.1 | 522.8 | 784.4  | 35 | 12 |
| GSTA3 | LHYFNGR         | 16.7 | 302.8 | 338.2  | 35 | 6  |
| GSTA3 | LHYFNGR         | 16.7 | 302.8 | 346.2  | 35 | 6  |
| GSTA3 | LHYFNGR         | 16.7 | 302.8 | 232.1  | 35 | 6  |
| GSTA3 | LHYFNGR         | 16.7 | 306.2 | 356.2  | 35 | 6  |
| GSTA3 | LHYFNGR         | 16.7 | 306.2 | 242.1  | 35 | 6  |
| GSTA3 | VLQSHGQDYLVGNK  | 18.1 | 779.4 | 993.5  | 35 | 30 |
| GSTA3 | VLQSHGQDYLVGNK  | 18.1 | 779.4 | 417.2  | 35 | 30 |
| GSTA3 | VLQSHGQDYLVGNK  | 18.1 | 779.4 | 318.2  | 35 | 30 |
| GSTA3 | VLQSHGQDYLVGNK  | 18.1 | 779.4 | 673.3  | 35 | 30 |
| GSTA3 | VLQSHGQDYLVGNK  | 18.1 | 783.4 | 425.3  | 35 | 30 |
| GSTA3 | VLQSHGQDYLVGNK  | 18.1 | 783.4 | 326.2  | 35 | 30 |

|       |                         |      |       |        |    |    |
|-------|-------------------------|------|-------|--------|----|----|
| GSTA4 | SILHYIADK               | 23.5 | 353.9 | 201.1  | 35 | 8  |
| GSTA4 | SILHYIADK               | 23.5 | 353.9 | 430.2  | 35 | 8  |
| GSTA4 | SILHYIADK               | 23.5 | 353.9 | 373.7  | 35 | 8  |
| GSTA4 | SILHYIAD <u>K</u>       | 23.5 | 356.5 | 434.2  | 35 | 8  |
| GSTA4 | SILHYIAD <u>K</u>       | 23.5 | 356.5 | 377.7  | 35 | 8  |
| GSTA4 | YFPVFEK                 | 29.1 | 465.2 | 311.1  | 35 | 11 |
| GSTA4 | YFPVFEK                 | 29.1 | 465.2 | 619.3  | 35 | 11 |
| GSTA4 | YFPVFEK                 | 29.1 | 465.2 | 423.2  | 35 | 11 |
| GSTA4 | YFPVFEK                 | 29.1 | 465.2 | 276.2  | 35 | 11 |
| GSTA4 | YFPVFEK                 | 29.1 | 465.2 | 310.2  | 35 | 11 |
| GSTA4 | YFPVFE <u>K</u>         | 29.1 | 469.2 | 311.1  | 35 | 11 |
| GSTA4 | YFPVFE <u>K</u>         | 29.1 | 469.2 | 627.4  | 35 | 11 |
| GSTA5 | FLESAEDLDK              | 27.5 | 583.8 | 261.2  | 35 | 23 |
| GSTA5 | FLESAEDLDK              | 27.5 | 583.8 | 390.2  | 35 | 23 |
| GSTA5 | FLESAEDLDK              | 27.5 | 583.8 | 906.4  | 35 | 23 |
| GSTA5 | FLESAEDLD <u>K</u>      | 27.5 | 587.8 | 261.2  | 35 | 23 |
| GSTA5 | FLESAEDLD <u>K</u>      | 27.5 | 587.8 | 390.2  | 35 | 23 |
| GSTA5 | FLQPGSQR                | 15.7 | 466.8 | 261.2  | 35 | 16 |
| GSTA5 | FLQPGSQR                | 15.7 | 466.8 | 672.3  | 35 | 16 |
| GSTA5 | FLQPGSQR                | 15.7 | 466.8 | 544.3  | 35 | 16 |
| GSTA5 | FLQPGSQR                | 15.7 | 471.8 | 261.2  | 35 | 16 |
| GSTA5 | FLQPGSQR                | 15.7 | 471.8 | 554.3  | 35 | 16 |
| GSTA5 | WLLAAAGVELEEK           | 35.4 | 714.9 | 300.2  | 35 | 23 |
| GSTA5 | WLLAAAGVELEEK           | 35.4 | 714.9 | 413.3  | 35 | 23 |
| GSTA5 | WLLAAAGVELEEK           | 35.4 | 714.9 | 1016.5 | 35 | 23 |
| GSTA5 | WLLAAAGVELEEK           | 35.4 | 714.9 | 803.4  | 35 | 23 |
| GSTA5 | WLLAAAGVELEEK           | 35.4 | 714.9 | 405.2  | 35 | 23 |
| GSTA5 | WLLAAAGVELEEK <u>K</u>  | 35.4 | 718.9 | 300.2  | 35 | 23 |
| GSTA5 | WLLAAAGVELEEK <u>K</u>  | 35.4 | 718.9 | 413.2  | 35 | 23 |
| GSTM1 | FLPRPVFSK               | 24.2 | 545.8 | 830.5  | 35 | 18 |
| GSTM1 | FLPRPVFSK               | 24.2 | 545.8 | 234.1  | 35 | 18 |
| GSTM1 | FLPRPVFSK               | 24.2 | 545.8 | 415.7  | 35 | 18 |
| GSTM1 | FLPRPVFS <u>K</u>       | 24.2 | 549.8 | 857.5  | 35 | 18 |
| GSTM1 | FLPRPVFS <u>K</u>       | 24.2 | 549.8 | 419.8  | 35 | 18 |
| GSTM1 | RPWFAGNK                | 19.7 | 488.3 | 587.3  | 35 | 20 |
| GSTM1 | RPWFAGNK                | 19.7 | 488.3 | 658.3  | 35 | 20 |
| GSTM1 | RPWFAGNK                | 19.7 | 488.3 | 318.2  | 35 | 20 |
| GSTM1 | RPWFAGN <u>K</u>        | 19.7 | 492.3 | 587.3  | 35 | 20 |
| GSTM1 | RPWFAGN <u>K</u>        | 19.7 | 492.3 | 269.2  | 35 | 20 |
| GSTM2 | ITFVDFIAYDVLER          | 38.6 | 850.9 | 865.4  | 35 | 27 |
| GSTM2 | ITFVDFIAYDVLER          | 38.6 | 850.9 | 794.4  | 35 | 27 |
| GSTM2 | ITFVDFIAYDVLER          | 38.6 | 850.9 | 631.3  | 35 | 27 |
| GSTM2 | ITFVDFIAYDVLER          | 38.6 | 850.9 | 516.3  | 35 | 27 |
| GSTM2 | ITFVDFIAYDVLER          | 38.6 | 850.9 | 304.2  | 35 | 27 |
| GSTM2 | ITFVDFIAYDVLER <u>R</u> | 38.6 | 856.0 | 875.4  | 35 | 27 |
| GSTM2 | ITFVDFIAYDVLER <u>R</u> | 38.6 | 856.0 | 804.4  | 35 | 27 |
| GSTM2 | ITFVDFIAYDVLER <u>R</u> | 38.6 | 856.0 | 641.3  | 35 | 27 |
| GSTM2 | ITFVDFIAYDVLER <u>R</u> | 38.6 | 856.0 | 526.3  | 35 | 27 |
| GSTM2 | ITFVDFIAYDVLER <u>R</u> | 38.6 | 856.0 | 314.2  | 35 | 27 |
| GSTM2 | LGLDFPNLPLYLIDGTHK      | 40.1 | 638.3 | 757.9  | 35 | 18 |

|       |                     |      |       |        |    |    |
|-------|---------------------|------|-------|--------|----|----|
| GSTM2 | LGLDFPNLPYLIDGTHK   | 40.1 | 638.3 | 684.4  | 35 | 18 |
| GSTM2 | LGLDFPNLPYLIDGTHK   | 40.1 | 638.3 | 522.3  | 35 | 18 |
| GSTM2 | LGLDFPNLPYLIDGTHK   | 40.1 | 641.0 | 688.4  | 35 | 18 |
| GSTM2 | LGLDFPNLPYLIDGTHK   | 40.1 | 641.0 | 526.3  | 35 | 18 |
| GSTM2 | NQVFEPSCLDAFPNLK    | 34.1 | 940.0 | 689.4  | 35 | 31 |
| GSTM2 | NQVFEPSCLDAFPNLK    | 34.1 | 940.0 | 618.4  | 35 | 31 |
| GSTM2 | NQVFEPSCLDAFPNLK    | 34.1 | 940.0 | 471.3  | 35 | 31 |
| GSTM2 | NQVFEPSCLDAFPNLK    | 34.1 | 944.0 | 1269.6 | 35 | 31 |
| GSTM2 | NQVFEPSCLDAFPNLK    | 34.1 | 944.0 | 479.3  | 35 | 31 |
| GSTM3 | FSWFAGEK            | 30.8 | 486.2 | 235.1  | 35 | 16 |
| GSTM3 | FSWFAGEK            | 30.8 | 486.2 | 737.4  | 35 | 16 |
| GSTM3 | FSWFAGEK            | 30.8 | 486.2 | 404.2  | 35 | 16 |
| GSTM3 | FSWFAGEK            | 30.8 | 490.2 | 235.1  | 35 | 16 |
| GSTM3 | FSWFAGEK            | 30.8 | 490.2 | 745.4  | 35 | 16 |
| GSTM3 | IAAYLQSDQFCK        | 24.2 | 722.4 | 256.2  | 35 | 27 |
| GSTM3 | IAAYLQSDQFCK        | 24.2 | 722.4 | 912.4  | 35 | 27 |
| GSTM3 | IAAYLQSDQFCK        | 24.2 | 722.4 | 307.1  | 35 | 27 |
| GSTM3 | IAAYLQSDQFCK        | 24.2 | 726.4 | 256.2  | 35 | 27 |
| GSTM3 | IAAYLQSDQFCK        | 24.2 | 726.4 | 315.2  | 35 | 27 |
| GSTM3 | LKPQYLEELPGQLK      | 27.9 | 828.5 | 655.4  | 35 | 27 |
| GSTM3 | LKPQYLEELPGQLK      | 27.9 | 828.5 | 542.3  | 35 | 27 |
| GSTM3 | LKPQYLEELPGQLK      | 27.9 | 828.5 | 707.9  | 35 | 27 |
| GSTM3 | LKPQYLEELPGQLK      | 27.9 | 832.5 | 550.3  | 35 | 27 |
| GSTM3 | LKPQYLEELPGQLK      | 27.9 | 832.5 | 711.9  | 35 | 27 |
| GSTM4 | IFEPNCLDAFPNLK      | 34.3 | 839.4 | 1288.6 | 35 | 31 |
| GSTM4 | IFEPNCLDAFPNLK      | 34.3 | 839.4 | 804.4  | 35 | 31 |
| GSTM4 | IFEPNCLDAFPNLK      | 34.3 | 839.4 | 618.4  | 35 | 31 |
| GSTM4 | IFEPNCLDAFPNLK      | 34.3 | 839.4 | 471.3  | 35 | 31 |
| GSTM4 | IFEPNCLDAFPNLK      | 34.3 | 839.4 | 709.3  | 35 | 31 |
| GSTM4 | IFEPNCLDAFPNLK      | 34.3 | 843.4 | 626.4  | 35 | 31 |
| GSTM4 | IFEPNCLDAFPNLK      | 34.3 | 843.4 | 479.3  | 35 | 31 |
| GSTM4 | RPWFVGDK            | 23.2 | 502.8 | 587.3  | 35 | 22 |
| GSTM4 | RPWFVGDK            | 23.2 | 502.8 | 686.4  | 35 | 22 |
| GSTM4 | RPWFVGDK            | 23.2 | 502.8 | 858.4  | 35 | 22 |
| GSTM4 | RPWFVGDK            | 23.2 | 502.8 | 319.2  | 35 | 22 |
| GSTM4 | RPWFVGDK            | 23.2 | 506.8 | 587.3  | 35 | 22 |
| GSTM4 | RPWFVGDK            | 23.2 | 506.8 | 327.2  | 35 | 22 |
| GSTP1 | ALPGQLKPFETLLSQNQGK | 33.4 | 709.4 | 831.4  | 35 | 21 |
| GSTP1 | ALPGQLKPFETLLSQNQGK | 33.4 | 709.4 | 718.3  | 35 | 21 |
| GSTP1 | ALPGQLKPFETLLSQNQGK | 33.4 | 709.4 | 971.5  | 35 | 21 |
| GSTP1 | ALPGQLKPFETLLSQNQGK | 33.4 | 712.1 | 839.4  | 35 | 21 |
| GSTP1 | ALPGQLKPFETLLSQNQGK | 33.4 | 712.1 | 726.4  | 35 | 21 |
| GSTP1 | EEVTVETWQEGSLK      | 35.1 | 867.4 | 948.5  | 35 | 28 |
| GSTP1 | EEVTVETWQEGSLK      | 35.1 | 867.4 | 847.4  | 35 | 28 |
| GSTP1 | EEVTVETWQEGSLK      | 35.1 | 867.4 | 260.2  | 35 | 28 |
| GSTP1 | EEVTVETWQEGSLK      | 35.1 | 871.4 | 855.4  | 35 | 28 |
| GSTP1 | EEVTVETWQEGSLK      | 35.1 | 871.4 | 268.2  | 35 | 28 |
| GSTP1 | FQDGDLTLYQSNTILR    | 31.2 | 942.5 | 1208.7 | 35 | 30 |
| GSTP1 | FQDGDLTLYQSNTILR    | 31.2 | 942.5 | 994.5  | 35 | 30 |
| GSTP1 | FQDGDLTLYQSNTILR    | 31.2 | 942.5 | 831.5  | 35 | 30 |

|         |                             |      |       |        |    |    |
|---------|-----------------------------|------|-------|--------|----|----|
| GSTP1   | FQDGDLTLYQSNTILR            | 31.2 | 942.5 | 703.4  | 35 | 30 |
| GSTP1   | FQDGDLTLYQSNTILR            | 31.2 | 942.5 | 288.2  | 35 | 30 |
| GSTP1   | FQDGDLTLYQSNTIL <u>R</u>    | 31.2 | 947.5 | 1218.7 | 35 | 30 |
| GSTP1   | FQDGDLTLYQSNTIL <u>R</u>    | 31.2 | 947.5 | 1004.5 | 35 | 30 |
| GSTP1   | FQDGDLTLYQSNTIL <u>R</u>    | 31.2 | 947.5 | 841.5  | 35 | 30 |
| GSTP1   | FQDGDLTLYQSNTIL <u>R</u>    | 31.2 | 947.5 | 713.4  | 35 | 30 |
| GSTP1   | FQDGDLTLYQSNTIL <u>R</u>    | 31.2 | 947.5 | 298.2  | 35 | 30 |
| GSTT1   | GQHLSDAFAQVNPLK             | 28.2 | 812.9 | 1189.6 | 35 | 26 |
| GSTT1   | GQHLSDAFAQVNPLK             | 28.2 | 812.9 | 769.5  | 35 | 26 |
| GSTT1   | GQHLSDAFAQVNPLK             | 28.2 | 812.9 | 471.3  | 35 | 26 |
| GSTT1   | GQHLSDAFAQVNPLK             | 28.2 | 812.9 | 720.4  | 35 | 26 |
| GSTT1   | GQHLSDAFAQVNPL <u>K</u>     | 28.2 | 816.9 | 1197.6 | 35 | 26 |
| GSTT1   | GQHLSDAFAQVNPL <u>K</u>     | 28.2 | 816.9 | 724.4  | 35 | 26 |
| GSTT1   | VDEYLAWQHHTTLR              | 27.2 | 544.6 | 563.3  | 35 | 15 |
| GSTT1   | VDEYLAWQHHTTLR              | 27.2 | 544.6 | 506.8  | 35 | 15 |
| GSTT1   | VDEYLAWQHHTTL <u>R</u>      | 27.2 | 547.9 | 771.9  | 35 | 15 |
| GSTT1   | VDEYLAWQHHTTL <u>R</u>      | 27.2 | 547.9 | 714.4  | 35 | 15 |
| GSTT1   | VEAAVGEDLFQEAHEVILK         | 36.2 | 699.7 | 935.0  | 35 | 20 |
| GSTT1   | VEAAVGEDLFQEAHEVILK         | 36.2 | 699.7 | 864.0  | 35 | 20 |
| GSTT1   | VEAAVGEDLFQEAHEVILK         | 36.2 | 699.7 | 814.4  | 35 | 20 |
| GSTT1   | VEAAVGEDLFQEAHEVIL <u>K</u> | 36.2 | 702.4 | 939.0  | 35 | 20 |
| GSTT1   | VEAAVGEDLFQEAHEVIL <u>K</u> | 36.2 | 702.4 | 818.4  | 35 | 20 |
| NAT1    | NIFNISLQR                   | 32.3 | 552.8 | 877.5  | 35 | 14 |
| NAT1    | NIFNISLQR                   | 32.3 | 552.8 | 730.4  | 35 | 14 |
| NAT1    | NIFNISLQR                   | 32.3 | 552.8 | 503.3  | 35 | 14 |
| NAT1    | NIFNISLQR <u>R</u>          | 32.3 | 557.8 | 887.5  | 35 | 14 |
| NAT1    | NIFNISLQR <u>R</u>          | 32.3 | 557.8 | 513.3  | 35 | 14 |
| NAT1    | TLSEEEIEK                   | 16.6 | 539.3 | 215.1  | 35 | 14 |
| NAT1    | TLSEEEIEK                   | 16.6 | 539.3 | 863.4  | 35 | 14 |
| NAT1    | TLSEEEIEK                   | 16.6 | 539.3 | 776.4  | 35 | 14 |
| NAT1    | TLSEEEIEK                   | 16.6 | 539.3 | 647.3  | 35 | 14 |
| NAT1    | TLSEEEIE <u>K</u>           | 16.6 | 543.3 | 215.1  | 35 | 14 |
| NAT1    | TLSEEEIE <u>K</u>           | 16.6 | 543.3 | 871.4  | 35 | 14 |
| NAT2    | TLTEEEVEEVLK                | 30.8 | 709.9 | 215.1  | 35 | 23 |
| NAT2    | TLTEEEVEEVLK                | 30.8 | 709.9 | 316.2  | 35 | 23 |
| NAT2    | TLTEEEVEEVLK                | 30.8 | 709.9 | 1204.6 | 35 | 23 |
| NAT2    | TLTEEEVEEVLK                | 30.8 | 709.9 | 974.5  | 35 | 23 |
| NAT2    | TLTEEEVEEVLK                | 30.8 | 709.9 | 617.4  | 35 | 23 |
| NAT2    | TLTEEEVEEVLK                | 30.8 | 709.9 | 260.2  | 35 | 23 |
| NAT2    | TLTEEEVEEVL <u>K</u>        | 30.8 | 713.9 | 215.1  | 35 | 23 |
| NAT2    | TLTEEEVEEVL <u>K</u>        | 30.8 | 713.9 | 268.2  | 35 | 23 |
| SLC10A1 | GIYDGDLK                    | 20.0 | 440.7 | 710.3  | 35 | 15 |
| SLC10A1 | GIYDGDLK                    | 20.0 | 440.7 | 547.3  | 35 | 15 |
| SLC10A1 | GIYDGDLK                    | 20.0 | 440.7 | 432.2  | 35 | 15 |
| SLC10A1 | GIYDGDLK                    | 20.0 | 440.7 | 260.2  | 35 | 15 |
| SLC10A1 | GIYDGDLK                    | 20.0 | 440.7 | 355.7  | 35 | 15 |
| SLC10A1 | GIYDGDL <u>K</u>            | 20.0 | 444.7 | 718.3  | 35 | 15 |
| SLC10A1 | GIYDGDL <u>K</u>            | 20.0 | 444.7 | 359.7  | 35 | 15 |
| SLC15A2 | IYNKPPPEGNIVAQVFK           | 30.5 | 638.7 | 691.4  | 35 | 18 |
| SLC15A2 | IYNKPPPEGNIVAQVFK           | 30.5 | 638.7 | 592.3  | 35 | 18 |

|          |                                  |      |        |        |    |    |
|----------|----------------------------------|------|--------|--------|----|----|
| SLC15A2  | IYNKPPPEGNIVAQVFK                | 30.5 | 638.7  | 698.4  | 35 | 18 |
| SLC15A2  | IYNKPPPEGNIVAQVFK                | 30.5 | 641.4  | 277.2  | 35 | 18 |
| SLC15A2  | IYNKPPPEGNIVAQVFK                | 30.5 | 641.4  | 702.4  | 35 | 18 |
| SLC15A2  | YHNLSLYTEHSVQEK                  | 19.3 | 462.7  | 301.1  | 35 | 12 |
| SLC15A2  | YHNLSLYTEHSVQEK                  | 19.3 | 462.7  | 590.3  | 35 | 12 |
| SLC15A2  | YHNLSLYTEHSVQEK                  | 19.3 | 462.7  | 560.8  | 35 | 12 |
| SLC15A2  | YHNLSLYTEHSVQEK                  | 19.3 | 464.7  | 564.8  | 35 | 12 |
| SLC15A2  | YHNLSLYTEHSVQEK                  | 19.3 | 464.7  | 483.2  | 35 | 12 |
| SLC22A1  | ENTIYLK                          | 16.4 | 440.7  | 244.1  | 35 | 10 |
| SLC22A1  | ENTIYLK                          | 16.4 | 440.7  | 536.3  | 35 | 10 |
| SLC22A1  | ENTIYLK                          | 16.4 | 440.7  | 423.3  | 35 | 10 |
| SLC22A1  | ENTIYLK                          | 16.4 | 440.7  | 260.2  | 35 | 10 |
| SLC22A1  | ENTIYLK                          | 16.4 | 444.7  | 244.1  | 35 | 10 |
| SLC22A1  | ENTIYLK                          | 16.4 | 444.7  | 544.4  | 35 | 10 |
| SLC22A1  | ENTIYLK                          | 16.4 | 444.7  | 431.3  | 35 | 10 |
| SLC22A1  | ENTIYLK                          | 16.4 | 444.7  | 268.2  | 35 | 10 |
| SLC22A1  | LSPSFADLFR                       | 34.9 | 576.8  | 603.3  | 35 | 19 |
| SLC22A1  | LSPSFADLFR                       | 34.9 | 576.8  | 621.3  | 35 | 19 |
| SLC22A1  | LSPSFADLFR                       | 34.9 | 576.8  | 435.3  | 35 | 19 |
| SLC22A1  | LSPSFADLFR                       | 34.9 | 576.8  | 322.2  | 35 | 19 |
| SLC22A1  | LSPSFADLFR                       | 34.9 | 581.8  | 603.3  | 35 | 19 |
| SLC22A1  | LSPSFADLFR                       | 34.9 | 581.8  | 332.2  | 35 | 19 |
| SLC22A1  | YEVDWNQSALS <u>C</u> VDPLASLATNR | 38.7 | 1305.1 | 1057.6 | 35 | 42 |
| SLC22A1  | YEVDWNQSALS <u>C</u> VDPLASLATNR | 38.7 | 1305.1 | 942.5  | 35 | 42 |
| SLC22A1  | YEVDWNQSALS <u>C</u> VDPLASLATNR | 38.7 | 1305.1 | 732.4  | 35 | 42 |
| SLC22A1  | YEVDWNQSALS <u>C</u> VDPLASLATNR | 38.7 | 1305.1 | 574.3  | 35 | 42 |
| SLC22A1  | YEVDWNQSALS <u>C</u> VDPLASLATNR | 38.7 | 1305.1 | 461.2  | 35 | 42 |
| SLC22A1  | YEVDWNQSALS <u>C</u> VDPLASLATNR | 38.7 | 1305.1 | 289.2  | 35 | 42 |
| SLC22A1  | YEVDWNQSALS <u>C</u> VDPLASLATNR | 38.7 | 1310.1 | 952.5  | 35 | 42 |
| SLC22A1  | YEVDWNQSALS <u>C</u> VDPLASLATNR | 38.7 | 1310.1 | 471.3  | 35 | 42 |
| SLC22A11 | GKPDQALQELR                      | 19.4 | 627.8  | 1069.6 | 35 | 21 |
| SLC22A11 | GKPDQALQELR                      | 19.4 | 627.8  | 417.2  | 35 | 21 |
| SLC22A11 | GKPDQALQELR                      | 19.4 | 627.8  | 288.2  | 35 | 21 |
| SLC22A11 | GKPDQALQELR                      | 19.4 | 627.8  | 535.3  | 35 | 21 |
| SLC22A11 | GKPDQALQELR                      | 19.4 | 632.8  | 1079.6 | 35 | 21 |
| SLC22A11 | GKPDQALQELR                      | 19.4 | 632.8  | 427.3  | 35 | 21 |
| SLC22A11 | GKPDQALQELR                      | 19.4 | 632.8  | 298.2  | 35 | 21 |
| SLC22A11 | GKPDQALQELR                      | 19.4 | 632.8  | 540.3  | 35 | 21 |
| SLC22A11 | SVFTSTIVAK                       | 24.7 | 526.8  | 866.5  | 35 | 13 |
| SLC22A11 | SVFTSTIVAK                       | 24.7 | 526.8  | 719.4  | 35 | 13 |
| SLC22A11 | SVFTSTIVAK                       | 24.7 | 526.8  | 433.8  | 35 | 13 |
| SLC22A11 | SVFTSTIVAK                       | 24.7 | 530.8  | 874.5  | 35 | 13 |
| SLC22A11 | SVFTSTIVAK                       | 24.7 | 530.8  | 437.8  | 35 | 13 |
| SLC22A11 | SVLDF <u>C</u> VPVLR             | 42.5 | 709.4  | 890.5  | 35 | 19 |
| SLC22A11 | SVLDF <u>C</u> VPVLR             | 42.5 | 709.4  | 743.4  | 35 | 19 |
| SLC22A11 | SVLDF <u>C</u> VPVLR             | 42.5 | 709.4  | 583.4  | 35 | 19 |
| SLC22A11 | SVLDF <u>C</u> VPVLR             | 42.5 | 709.4  | 484.3  | 35 | 19 |
| SLC22A11 | SVLDF <u>C</u> VPVLR             | 42.5 | 714.4  | 593.4  | 35 | 19 |
| SLC22A11 | SVLDF <u>C</u> VPVLR             | 42.5 | 714.4  | 494.3  | 35 | 19 |
| SLC22A12 | ATHGTLGNSVLK                     | 16.9 | 399.9  | 617.4  | 35 | 14 |



|          |                                   |      |        |        |    |    |
|----------|-----------------------------------|------|--------|--------|----|----|
| SLC22A12 | ATHGTLGNSVLK                      | 16.9 | 399.9  | 560.3  | 35 | 14 |
| SLC22A12 | ATHGTLGNSVLK                      | 16.9 | 399.9  | 446.3  | 35 | 14 |
| SLC22A12 | ATHGTLGNSVLK                      | 16.9 | 399.9  | 260.2  | 35 | 14 |
| SLC22A12 | ATHGTLGNSVLK                      | 16.9 | 399.9  | 309.2  | 35 | 14 |
| SLC22A12 | ATHGTLGNSVL <u>K</u>              | 16.9 | 402.6  | 625.4  | 35 | 14 |
| SLC22A12 | ATHGTLGNSVL <u>K</u>              | 16.9 | 402.6  | 454.3  | 35 | 14 |
| SLC22A12 | ATHGTLGNSVL <u>K</u>              | 16.9 | 402.6  | 268.2  | 35 | 14 |
| SLC22A12 | LDWGLQELWR                        | 40.6 | 658.3  | 472.2  | 35 | 21 |
| SLC22A12 | LDWGLQELWR                        | 40.6 | 658.3  | 901.5  | 35 | 21 |
| SLC22A12 | LDWGLQELWR                        | 40.6 | 658.3  | 361.2  | 35 | 21 |
| SLC22A12 | LDWGLQELW <u>R</u>                | 40.6 | 663.3  | 741.4  | 35 | 21 |
| SLC22A12 | LDWGLQELW <u>R</u>                | 40.6 | 663.3  | 371.2  | 35 | 21 |
| SLC22A12 | SIFTSTIVAK                        | 27.4 | 533.8  | 201.1  | 35 | 14 |
| SLC22A12 | SIFTSTIVAK                        | 27.4 | 533.8  | 866.5  | 35 | 14 |
| SLC22A12 | SIFTSTIVAK                        | 27.4 | 533.8  | 719.4  | 35 | 14 |
| SLC22A12 | SIFTSTIVAK                        | 27.4 | 537.8  | 201.1  | 35 | 14 |
| SLC22A12 | SIFTSTIVAK                        | 27.4 | 537.8  | 874.5  | 35 | 14 |
| SLC22A16 | ENTSSLGYEYTGSK                    | 19.0 | 768.3  | 244.1  | 35 | 29 |
| SLC22A16 | ENTSSLGYEYTGSK                    | 19.0 | 768.3  | 904.4  | 35 | 29 |
| SLC22A16 | ENTSSLGYEYTGSK                    | 19.0 | 768.3  | 847.4  | 35 | 29 |
| SLC22A16 | ENTSSLGYEYTGSK                    | 19.0 | 768.3  | 684.3  | 35 | 29 |
| SLC22A16 | ENTSSLGYEYTGSK                    | 19.0 | 768.3  | 392.2  | 35 | 29 |
| SLC22A16 | ENTSSLGYEYTGSK                    | 19.0 | 768.3  | 291.2  | 35 | 29 |
| SLC22A16 | ENTSSLGYEYTGSK                    | 19.0 | 772.4  | 400.2  | 35 | 29 |
| SLC22A16 | ENTSSLGYEYTGSK                    | 19.0 | 772.4  | 299.2  | 35 | 29 |
| SLC22A16 | LLTTNNSGLEK                       | 23.7 | 651.9  | 227.2  | 35 | 21 |
| SLC22A16 | LLTTNNSGLEK                       | 23.7 | 651.9  | 340.3  | 35 | 21 |
| SLC22A16 | LLTTNNSGLEK                       | 23.7 | 651.9  | 1076.6 | 35 | 21 |
| SLC22A16 | LLTTNNSGLEK                       | 23.7 | 651.9  | 963.5  | 35 | 21 |
| SLC22A16 | LLTTNNSGLEK                       | 23.7 | 651.9  | 862.4  | 35 | 21 |
| SLC22A16 | LLTTNNSGLE <u>K</u>               | 23.7 | 655.9  | 227.2  | 35 | 21 |
| SLC22A16 | LLTTNNSGLE <u>K</u>               | 23.7 | 655.9  | 971.5  | 35 | 21 |
| SLC22A2  | <u>CGWSPA</u> EELNYTVPGPGPAGEASPR | 31.0 | 1300.1 | 1092.5 | 35 | 45 |
| SLC22A2  | <u>CGWSPA</u> EELNYTVPGPGPAGEASPR | 31.0 | 1300.1 | 784.4  | 35 | 45 |
| SLC22A2  | <u>CGWSPA</u> EELNYTVPGPGPAGEASPR | 31.0 | 1300.1 | 616.3  | 35 | 45 |
| SLC22A2  | <u>CGWSPA</u> EELNYTVPGPGPAGEASPR | 31.0 | 1300.1 | 359.2  | 35 | 45 |
| SLC22A2  | <u>CGWSPA</u> EELNYTVPGPGPAGEASPR | 31.0 | 1300.1 | 272.2  | 35 | 45 |
| SLC22A2  | <u>CGWSPA</u> EELNYTVPGPGPAGEASPR | 31.0 | 1305.1 | 1102.6 | 35 | 45 |
| SLC22A2  | <u>CGWSPA</u> EELNYTVPGPGPAGEASPR | 31.0 | 1305.1 | 282.2  | 35 | 45 |
| SLC22A2  | LNPSFLDLVR                        | 36.0 | 587.3  | 228.1  | 35 | 14 |
| SLC22A2  | LNPSFLDLVR                        | 36.0 | 587.3  | 946.5  | 35 | 14 |
| SLC22A2  | LNPSFLDLVR                        | 36.0 | 587.3  | 473.8  | 35 | 14 |
| SLC22A2  | LNPSFLDLV <u>R</u>                | 36.0 | 592.3  | 228.1  | 35 | 14 |
| SLC22A2  | LNPSFLDLV <u>R</u>                | 36.0 | 592.3  | 478.8  | 35 | 14 |
| SLC22A2  | SPGVAELSLR                        | 24.4 | 514.8  | 341.2  | 35 | 17 |
| SLC22A2  | SPGVAELSLR                        | 24.4 | 514.8  | 844.5  | 35 | 17 |
| SLC22A2  | SPGVAELSLR                        | 24.4 | 514.8  | 688.4  | 35 | 17 |
| SLC22A2  | SPGVAELSL <u>R</u>                | 24.4 | 519.8  | 341.2  | 35 | 17 |
| SLC22A2  | SPGVAELSL <u>R</u>                | 24.4 | 519.8  | 698.4  | 35 | 17 |
| SLC22A3  | FLQGVFGK                          | 28.8 | 448.3  | 261.2  | 35 | 15 |

|         |                                |      |        |        |    |    |
|---------|--------------------------------|------|--------|--------|----|----|
| SLC22A3 | FLQGVFGK                       | 28.8 | 448.3  | 635.4  | 35 | 15 |
| SLC22A3 | FLQGVFGK                       | 28.8 | 448.3  | 507.3  | 35 | 15 |
| SLC22A3 | FLQGVFG <u>K</u>               | 28.8 | 452.3  | 261.2  | 35 | 15 |
| SLC22A3 | FLQGVFG <u>K</u>               | 28.8 | 452.3  | 643.4  | 35 | 15 |
| SLC22A3 | GIALPETVDDVEK                  | 26.2 | 693.4  | 242.1  | 35 | 23 |
| SLC22A3 | GIALPETVDDVEK                  | 26.2 | 693.4  | 355.2  | 35 | 23 |
| SLC22A3 | GIALPETVDDVEK                  | 26.2 | 693.4  | 1031.5 | 35 | 23 |
| SLC22A3 | GIALPETVDDVEK                  | 26.2 | 693.4  | 805.4  | 35 | 23 |
| SLC22A3 | GIALPETVDDVEK                  | 26.2 | 693.4  | 516.2  | 35 | 23 |
| SLC22A3 | GIALPETVDDVE <u>K</u>          | 26.2 | 697.4  | 242.1  | 35 | 23 |
| SLC22A3 | GIALPETVDDVE <u>K</u>          | 26.2 | 697.4  | 520.3  | 35 | 23 |
| SLC22A3 | GPSAAALAER                     | 16.0 | 471.8  | 630.4  | 35 | 16 |
| SLC22A3 | GPSAAALAER                     | 16.0 | 471.8  | 559.3  | 35 | 16 |
| SLC22A3 | GPSAAALAER                     | 16.0 | 471.8  | 375.2  | 35 | 16 |
| SLC22A3 | GPSAAALAER                     | 16.0 | 476.8  | 640.4  | 35 | 16 |
| SLC22A3 | GPSAAALAER                     | 16.0 | 476.8  | 569.3  | 35 | 16 |
| SLC22A4 | DYDEVIAFLGEWGPFQR              | 42.8 | 1021.5 | 394.1  | 35 | 33 |
| SLC22A4 | DYDEVIAFLGEWGPFQR              | 42.8 | 1021.5 | 523.2  | 35 | 33 |
| SLC22A4 | DYDEVIAFLGEWGPFQR              | 42.8 | 1021.5 | 622.2  | 35 | 33 |
| SLC22A4 | DYDEVIAFLGEWGPFQR              | 42.8 | 1026.5 | 394.1  | 35 | 33 |
| SLC22A4 | DYDEVIAFLGEWGPFQR              | 42.8 | 1026.5 | 523.2  | 35 | 33 |
| SLC22A5 | ANGIVVPSTIFDPSELQDLSSK         | 37.8 | 1159.1 | 243.1  | 35 | 42 |
| SLC22A5 | ANGIVVPSTIFDPSELQDLSSK         | 37.8 | 1159.1 | 356.2  | 35 | 42 |
| SLC22A5 | ANGIVVPSTIFDPSELQDLSSK         | 37.8 | 1159.1 | 455.3  | 35 | 42 |
| SLC22A5 | ANGIVVPSTIFDPSELQDLSSK         | 37.8 | 1159.1 | 554.3  | 35 | 42 |
| SLC22A5 | ANGIVVPSTIFDPSELQDLSSK         | 37.8 | 1159.1 | 1103.6 | 35 | 42 |
| SLC22A5 | ANGIVVPSTIFDPSELQDLSS <u>K</u> | 37.8 | 1163.1 | 243.1  | 35 | 42 |
| SLC22A5 | ANGIVVPSTIFDPSELQDLSS <u>K</u> | 37.8 | 1163.1 | 356.2  | 35 | 42 |
| SLC22A5 | FEEAEVIIR                      | 25.6 | 553.3  | 829.5  | 35 | 18 |
| SLC22A5 | FEEAEVIIR                      | 25.6 | 553.3  | 500.4  | 35 | 18 |
| SLC22A5 | FEEAEVIIR                      | 25.6 | 553.3  | 288.2  | 35 | 18 |
| SLC22A5 | FEEAEVIIR                      | 25.6 | 558.3  | 839.5  | 35 | 18 |
| SLC22A5 | FEEAEVIIR                      | 25.6 | 558.3  | 510.4  | 35 | 18 |
| SLC22A5 | QQSHNILDLLR                    | 30.0 | 446.2  | 629.4  | 35 | 11 |
| SLC22A5 | QQSHNILDLLR                    | 30.0 | 446.2  | 516.3  | 35 | 11 |
| SLC22A5 | QQSHNILDLLR                    | 30.0 | 446.2  | 288.2  | 35 | 11 |
| SLC22A5 | QQSHNILDLLR                    | 30.0 | 446.2  | 315.2  | 35 | 11 |
| SLC22A5 | QQSHNILDLLR                    | 30.0 | 449.6  | 639.4  | 35 | 11 |
| SLC22A5 | QQSHNILDLLR                    | 30.0 | 449.6  | 526.3  | 35 | 11 |
| SLC22A6 | EAGIYPR                        | 16.0 | 403.2  | 201.1  | 35 | 18 |
| SLC22A6 | EAGIYPR                        | 16.0 | 403.2  | 605.3  | 35 | 18 |
| SLC22A6 | EAGIYPR                        | 16.0 | 403.2  | 548.3  | 35 | 18 |
| SLC22A6 | EAGIYPR                        | 16.0 | 403.2  | 435.2  | 35 | 18 |
| SLC22A6 | EAGIYPR                        | 16.0 | 403.2  | 272.2  | 35 | 18 |
| SLC22A6 | EAGIYPR                        | 16.0 | 408.2  | 445.2  | 35 | 18 |
| SLC22A6 | EAGIYPR                        | 16.0 | 408.2  | 282.2  | 35 | 18 |
| SLC22A6 | NGGLEVWLPR                     | 33.7 | 570.8  | 229.1  | 35 | 19 |
| SLC22A6 | NGGLEVWLPR                     | 33.7 | 570.8  | 799.4  | 35 | 19 |
| SLC22A6 | NGGLEVWLPR                     | 33.7 | 570.8  | 670.4  | 35 | 19 |
| SLC22A6 | NGGLEVWLPR                     | 33.7 | 570.8  | 571.3  | 35 | 19 |

|         |                         |      |       |        |    |    |
|---------|-------------------------|------|-------|--------|----|----|
| SLC22A6 | NGGLEVWLPR              | 33.7 | 570.8 | 272.2  | 35 | 19 |
| SLC22A6 | NGGLEVWLPR              | 33.7 | 575.8 | 229.1  | 35 | 19 |
| SLC22A6 | NGGLEVWLPR              | 33.7 | 575.8 | 282.2  | 35 | 19 |
| SLC22A7 | CALPGAPANFSHQDVWLEAHLPR | 32.2 | 647.3 | 232.1  | 35 | 19 |
| SLC22A7 | CALPGAPANFSHQDVWLEAHLPR | 32.2 | 647.3 | 835.5  | 35 | 19 |
| SLC22A7 | CALPGAPANFSHQDVWLEAHLPR | 32.2 | 647.3 | 722.4  | 35 | 19 |
| SLC22A7 | CALPGAPANFSHQDVWLEAHLPR | 32.2 | 647.3 | 385.3  | 35 | 19 |
| SLC22A7 | CALPGAPANFSHQDVWLEAHLPR | 32.2 | 647.3 | 272.2  | 35 | 19 |
| SLC22A7 | CALPGAPANFSHQDVWLEAHLPR | 32.2 | 649.8 | 232.1  | 35 | 19 |
| SLC22A7 | CALPGAPANFSHQDVWLEAHLPR | 32.2 | 649.8 | 282.2  | 35 | 19 |
| SLC22A7 | FAYPQALPNTTLGEER        | 28.3 | 904.0 | 219.1  | 35 | 25 |
| SLC22A7 | FAYPQALPNTTLGEER        | 28.3 | 904.0 | 382.2  | 35 | 25 |
| SLC22A7 | FAYPQALPNTTLGEER        | 28.3 | 904.0 | 1425.7 | 35 | 25 |
| SLC22A7 | FAYPQALPNTTLGEER        | 28.3 | 904.0 | 1016.5 | 35 | 25 |
| SLC22A7 | FAYPQALPNTTLGEER        | 28.3 | 904.0 | 713.4  | 35 | 25 |
| SLC22A7 | FAYPQALPNTTLGEER        | 28.3 | 909.0 | 1026.5 | 35 | 25 |
| SLC22A7 | FAYPQALPNTTLGEER        | 28.3 | 909.0 | 718.4  | 35 | 25 |
| SLC22A7 | QAQLPETIQDVER           | 24.4 | 763.9 | 328.2  | 35 | 30 |
| SLC22A7 | QAQLPETIQDVER           | 24.4 | 763.9 | 441.2  | 35 | 30 |
| SLC22A7 | QAQLPETIQDVER           | 24.4 | 763.9 | 1086.5 | 35 | 30 |
| SLC22A7 | QAQLPETIQDVER           | 24.4 | 763.9 | 543.8  | 35 | 30 |
| SLC22A7 | QAQLPETIQDVER           | 24.4 | 768.9 | 328.2  | 35 | 30 |
| SLC22A7 | QAQLPETIQDVER           | 24.4 | 768.9 | 1096.6 | 35 | 30 |
| SLC22A8 | FVHPPNASLPNDTQR         | 19.7 | 565.0 | 482.3  | 35 | 12 |
| SLC22A8 | FVHPPNASLPNDTQR         | 19.7 | 565.0 | 730.3  | 35 | 12 |
| SLC22A8 | FVHPPNASLPNDTQR         | 19.7 | 565.0 | 633.3  | 35 | 12 |
| SLC22A8 | FVHPPNASLPNDTQR         | 19.7 | 565.0 | 365.7  | 35 | 12 |
| SLC22A8 | FVHPPNASLPNDTQR         | 19.7 | 568.3 | 740.4  | 35 | 12 |
| SLC22A8 | FVHPPNASLPNDTQR         | 19.7 | 568.3 | 370.7  | 35 | 12 |
| SLC22A8 | YTASDLFR                | 26.8 | 486.7 | 265.1  | 35 | 12 |
| SLC22A8 | YTASDLFR                | 26.8 | 486.7 | 708.4  | 35 | 12 |
| SLC22A8 | YTASDLFR                | 26.8 | 486.7 | 637.3  | 35 | 12 |
| SLC22A8 | YTASDLFR                | 26.8 | 491.7 | 265.1  | 35 | 12 |
| SLC22A8 | YTASDLFR                | 26.8 | 491.7 | 718.4  | 35 | 12 |
| SLC22A9 | DTLTLEILK               | 33.0 | 523.3 | 217.1  | 35 | 13 |
| SLC22A9 | DTLTLEILK               | 33.0 | 523.3 | 829.5  | 35 | 13 |
| SLC22A9 | DTLTLEILK               | 33.0 | 523.3 | 716.5  | 35 | 13 |
| SLC22A9 | DTLTLEILK               | 33.0 | 527.3 | 217.1  | 35 | 13 |
| SLC22A9 | DTLTLEILK               | 33.0 | 527.3 | 724.5  | 35 | 13 |
| SLC22A9 | NKPLFDTIQDEK            | 23.4 | 483.3 | 453.3  | 35 | 13 |
| SLC22A9 | NKPLFDTIQDEK            | 23.4 | 483.3 | 632.3  | 35 | 13 |
| SLC22A9 | NKPLFDTIQDEK            | 23.4 | 483.3 | 519.2  | 35 | 13 |
| SLC22A9 | NKPLFDTIQDEK            | 23.4 | 483.3 | 391.2  | 35 | 13 |
| SLC22A9 | NKPLFDTIQDEK            | 23.4 | 483.3 | 276.2  | 35 | 13 |
| SLC22A9 | NKPLFDTIQDEK            | 23.4 | 485.9 | 527.3  | 35 | 13 |
| SLC22A9 | NKPLFDTIQDEK            | 23.4 | 485.9 | 284.2  | 35 | 13 |
| SLC27A1 | FCSGDLGPEGILPDTHLLDPLLK | 40.7 | 836.4 | 470.3  | 35 | 25 |
| SLC27A1 | FCSGDLGPEGILPDTHLLDPLLK | 40.7 | 836.4 | 1100.6 | 35 | 25 |
| SLC27A1 | FCSGDLGPEGILPDTHLLDPLLK | 40.7 | 836.4 | 914.5  | 35 | 25 |
| SLC27A1 | FCSGDLGPEGILPDTHLLDPLLK | 40.7 | 836.4 | 886.0  | 35 | 25 |

|         |                         |      |        |        |    |    |
|---------|-------------------------|------|--------|--------|----|----|
| SLC27A1 | FCSGDLGPEGILPDTHLLDPLLK | 40.7 | 836.4  | 631.4  | 35 | 25 |
| SLC27A1 | FCSGDLGPEGILPDTHLLDPLLK | 40.7 | 839.1  | 478.3  | 35 | 25 |
| SLC27A1 | FCSGDLGPEGILPDTHLLDPLLK | 40.7 | 839.1  | 918.5  | 35 | 25 |
| SLC27A1 | LLGQTDVAVYGVAVPGVEGK    | 31.6 | 986.5  | 912.5  | 35 | 37 |
| SLC27A1 | LLGQTDVAVYGVAVPGVEGK    | 31.6 | 986.5  | 756.4  | 35 | 37 |
| SLC27A1 | LLGQTDVAVYGVAVPGVEGK    | 31.6 | 986.5  | 586.3  | 35 | 37 |
| SLC27A1 | LLGQTDVAVYGVAVPGVEGK    | 31.6 | 990.5  | 1083.6 | 35 | 37 |
| SLC27A1 | LLGQTDVAVYGVAVPGVEGK    | 31.6 | 990.5  | 594.3  | 35 | 37 |
| SLC27A1 | QGHYLPLNEAVYTR          | 24.9 | 830.9  | 599.3  | 35 | 27 |
| SLC27A1 | QGHYLPLNEAVYTR          | 24.9 | 830.9  | 1175.6 | 35 | 27 |
| SLC27A1 | QGHYLPLNEAVYTR          | 24.9 | 830.9  | 1062.6 | 35 | 27 |
| SLC27A1 | QGHYLPLNEAVYTR          | 24.9 | 830.9  | 439.2  | 35 | 27 |
| SLC27A1 | QGHYLPLNEAVYTR          | 24.9 | 835.9  | 599.3  | 35 | 27 |
| SLC27A1 | QGHYLPLNEAVYTR          | 24.9 | 835.9  | 1072.6 | 35 | 27 |
| SLC28A1 | AGSSFVFGEALVK           | 32.9 | 656.4  | 862.5  | 35 | 21 |
| SLC28A1 | AGSSFVFGEALVK           | 32.9 | 656.4  | 763.4  | 35 | 21 |
| SLC28A1 | AGSSFVFGEALVK           | 32.9 | 656.4  | 616.4  | 35 | 21 |
| SLC28A1 | AGSSFVFGEALVK           | 32.9 | 656.4  | 430.3  | 35 | 21 |
| SLC28A1 | AGSSFVFGEALVK           | 32.9 | 656.4  | 246.2  | 35 | 21 |
| SLC28A1 | AGSSFVFGEALVK           | 32.9 | 660.4  | 771.4  | 35 | 21 |
| SLC28A1 | AGSSFVFGEALVK           | 32.9 | 660.4  | 624.4  | 35 | 21 |
| SLC28A1 | LAGAEEWVGDR             | 23.6 | 601.8  | 1018.5 | 35 | 20 |
| SLC28A1 | LAGAEEWVGDR             | 23.6 | 601.8  | 890.4  | 35 | 20 |
| SLC28A1 | LAGAEEWVGDR             | 23.6 | 601.8  | 761.4  | 35 | 20 |
| SLC28A1 | LAGAEEWVGDR             | 23.6 | 601.8  | 632.3  | 35 | 20 |
| SLC28A1 | LAGAEEWVGDR             | 23.6 | 601.8  | 347.2  | 35 | 20 |
| SLC28A1 | LAGAEEWVGDR             | 23.6 | 606.8  | 1028.5 | 35 | 20 |
| SLC28A1 | LAGAEEWVGDR             | 23.6 | 606.8  | 357.2  | 35 | 20 |
| SLC28A1 | LTYGDAQNLIEAASTGAAISVK  | 35.9 | 1097.1 | 975.5  | 35 | 35 |
| SLC28A1 | LTYGDAQNLIEAASTGAAISVK  | 35.9 | 1097.1 | 517.3  | 35 | 35 |
| SLC28A1 | LTYGDAQNLIEAASTGAAISVK  | 35.9 | 1097.1 | 333.2  | 35 | 35 |
| SLC28A1 | LTYGDAQNLIEAASTGAAISVK  | 35.9 | 1097.1 | 990.0  | 35 | 35 |
| SLC28A1 | LTYGDAQNLIEAASTGAAISVK  | 35.9 | 1101.1 | 525.3  | 35 | 35 |
| SLC28A1 | LTYGDAQNLIEAASTGAAISVK  | 35.9 | 1101.1 | 341.2  | 35 | 35 |
| SLC28A2 | GAEADCVSFPNTSFTNR       | 26.6 | 936.9  | 444.2  | 35 | 25 |
| SLC28A2 | GAEADCVSFPNTSFTNR       | 26.6 | 936.9  | 1170.6 | 35 | 25 |
| SLC28A2 | GAEADCVSFPNTSFTNR       | 26.6 | 936.9  | 390.2  | 35 | 25 |
| SLC28A2 | GAEADCVSFPNTSFTNR       | 26.6 | 936.9  | 289.2  | 35 | 25 |
| SLC28A2 | GAEADCVSFPNTSFTNR       | 26.6 | 941.9  | 946.5  | 35 | 25 |
| SLC28A2 | GAEADCVSFPNTSFTNR       | 26.6 | 941.9  | 400.2  | 35 | 25 |
| SLC28A2 | GLFQSTSLNGTNPPSFSGPWEDK | 34.6 | 1233.6 | 1360.6 | 35 | 39 |
| SLC28A2 | GLFQSTSLNGTNPPSFSGPWEDK | 34.6 | 1233.6 | 1246.6 | 35 | 39 |
| SLC28A2 | GLFQSTSLNGTNPPSFSGPWEDK | 34.6 | 1233.6 | 818.4  | 35 | 39 |
| SLC28A2 | GLFQSTSLNGTNPPSFSGPWEDK | 34.6 | 1233.6 | 674.3  | 35 | 39 |
| SLC28A2 | GLFQSTSLNGTNPPSFSGPWEDK | 34.6 | 1233.6 | 262.1  | 35 | 39 |
| SLC28A2 | GLFQSTSLNGTNPPSFSGPWEDK | 34.6 | 1237.6 | 1254.6 | 35 | 39 |
| SLC28A2 | GLFQSTSLNGTNPPSFSGPWEDK | 34.6 | 1237.6 | 270.2  | 35 | 39 |
| SLC28A2 | TDAQGHSLGDGLGPSTYQR     | 19.8 | 654.0  | 217.1  | 35 | 19 |
| SLC28A2 | TDAQGHSLGDGLGPSTYQR     | 19.8 | 654.0  | 808.4  | 35 | 19 |
| SLC28A2 | TDAQGHSLGDGLGPSTYQR     | 19.8 | 654.0  | 751.4  | 35 | 19 |

|         |                      |      |        |        |    |    |
|---------|----------------------|------|--------|--------|----|----|
| SLC28A2 | TDAQGHSLGDGLGPSTYQR  | 19.8 | 654.0  | 466.2  | 35 | 19 |
| SLC28A2 | TDAQGHSLGDGLGPSTYQR  | 19.8 | 654.0  | 489.8  | 35 | 19 |
| SLC28A2 | TDAQGHSLGDGLGPSTYQR  | 19.8 | 657.3  | 818.4  | 35 | 19 |
| SLC28A2 | TDAQGHSLGDGLGPSTYQR  | 19.8 | 657.3  | 761.4  | 35 | 19 |
| SLC28A3 | FVNGVQQYISIR         | 29.6 | 712.4  | 247.1  | 35 | 23 |
| SLC28A3 | FVNGVQQYISIR         | 29.6 | 712.4  | 1177.6 | 35 | 23 |
| SLC28A3 | FVNGVQQYISIR         | 29.6 | 712.4  | 907.5  | 35 | 23 |
| SLC28A3 | FVNGVQQYISIR         | 29.6 | 712.4  | 375.2  | 35 | 23 |
| SLC28A3 | FVNGVQQYISIR         | 29.6 | 717.4  | 247.1  | 35 | 23 |
| SLC28A3 | FVNGVQQYISIR         | 29.6 | 717.4  | 385.2  | 35 | 23 |
| SLC28A3 | GPGEVIPGGNHSLSLK     | 25.1 | 575.6  | 440.2  | 35 | 16 |
| SLC28A3 | GPGEVIPGGNHSLSLK     | 25.1 | 575.6  | 553.3  | 35 | 16 |
| SLC28A3 | GPGEVIPGGNHSLSLK     | 25.1 | 575.6  | 692.9  | 35 | 16 |
| SLC28A3 | GPGEVIPGGNHSLSLK     | 25.1 | 575.6  | 586.8  | 35 | 16 |
| SLC28A3 | GPGEVIPGGNHSLSLK     | 25.1 | 578.3  | 696.9  | 35 | 16 |
| SLC28A3 | GPGEVIPGGNHSLSLK     | 25.1 | 578.3  | 590.8  | 35 | 16 |
| SLC28A3 | TFFNEFVAYEHLSK       | 34.9 | 578.0  | 249.1  | 35 | 16 |
| SLC28A3 | TFFNEFVAYEHLSK       | 34.9 | 578.0  | 847.4  | 35 | 16 |
| SLC28A3 | TFFNEFVAYEHLSK       | 34.9 | 578.0  | 742.4  | 35 | 16 |
| SLC28A3 | TFFNEFVAYEHLSK       | 34.9 | 580.6  | 249.1  | 35 | 16 |
| SLC28A3 | TFFNEFVAYEHLSK       | 34.9 | 580.6  | 746.4  | 35 | 16 |
| SLC29A1 | DAQASAAPAAPLPER      | 17.8 | 732.9  | 921.5  | 35 | 20 |
| SLC29A1 | DAQASAAPAAPLPER      | 17.8 | 732.9  | 850.5  | 35 | 20 |
| SLC29A1 | DAQASAAPAAPLPER      | 17.8 | 732.9  | 611.4  | 35 | 20 |
| SLC29A1 | DAQASAAPAAPLPER      | 17.8 | 732.9  | 401.2  | 35 | 20 |
| SLC29A1 | DAQASAAPAAPLPER      | 17.8 | 737.9  | 860.5  | 35 | 20 |
| SLC29A1 | DAQASAAPAAPLPER      | 17.8 | 737.9  | 411.2  | 35 | 20 |
| SLC29A1 | EESGVSVSNSQPTNESHSIK | 14.4 | 1058.5 | 1012.5 | 35 | 39 |
| SLC29A1 | EESGVSVSNSQPTNESHSIK | 14.4 | 1058.5 | 571.3  | 35 | 39 |
| SLC29A1 | EESGVSVSNSQPTNESHSIK | 14.4 | 1058.5 | 807.9  | 35 | 39 |
| SLC29A1 | EESGVSVSNSQPTNESHSIK | 14.4 | 1062.5 | 1020.5 | 35 | 39 |
| SLC29A1 | EESGVSVSNSQPTNESHSIK | 14.4 | 1062.5 | 579.3  | 35 | 39 |
| SLC29A1 | LEGPGEQETK           | 12.3 | 544.3  | 300.2  | 35 | 18 |
| SLC29A1 | LEGPGEQETK           | 12.3 | 544.3  | 248.2  | 35 | 18 |
| SLC29A1 | LEGPGEQETK           | 12.3 | 544.3  | 394.7  | 35 | 18 |
| SLC29A1 | LEGPGEQETK           | 12.3 | 548.3  | 853.4  | 35 | 18 |
| SLC29A1 | LEGPGEQETK           | 12.3 | 548.3  | 427.2  | 35 | 18 |
| SLC29A2 | AELLQSDENGIPSSPQK    | 21.8 | 907.0  | 314.2  | 35 | 25 |
| SLC29A2 | AELLQSDENGIPSSPQK    | 21.8 | 907.0  | 643.3  | 35 | 25 |
| SLC29A2 | AELLQSDENGIPSSPQK    | 21.8 | 907.0  | 372.2  | 35 | 25 |
| SLC29A2 | AELLQSDENGIPSSPQK    | 21.8 | 911.0  | 314.2  | 35 | 25 |
| SLC29A2 | AELLQSDENGIPSSPQK    | 21.8 | 911.0  | 651.4  | 35 | 25 |
| SLC29A2 | SLTSYFLWPDEDSR       | 38.2 | 858.4  | 1164.5 | 35 | 28 |
| SLC29A2 | SLTSYFLWPDEDSR       | 38.2 | 858.4  | 1017.5 | 35 | 28 |
| SLC29A2 | SLTSYFLWPDEDSR       | 38.2 | 858.4  | 904.4  | 35 | 28 |
| SLC29A2 | SLTSYFLWPDEDSR       | 38.2 | 858.4  | 718.3  | 35 | 28 |
| SLC29A2 | SLTSYFLWPDEDSR       | 38.2 | 858.4  | 506.2  | 35 | 28 |
| SLC29A2 | SLTSYFLWPDEDSR       | 38.2 | 858.4  | 262.2  | 35 | 28 |
| SLC29A2 | SLTSYFLWPDEDSR       | 38.2 | 863.4  | 728.3  | 35 | 28 |
| SLC29A2 | SLTSYFLWPDEDSR       | 38.2 | 863.4  | 272.2  | 35 | 28 |

|         |                                    |      |       |       |    |    |
|---------|------------------------------------|------|-------|-------|----|----|
| SLC29A2 | SSQAQAQELETK                       | 13.1 | 660.3 | 374.2 | 35 | 22 |
| SLC29A2 | SSQAQAQELETK                       | 13.1 | 660.3 | 946.5 | 35 | 22 |
| SLC29A2 | SSQAQAQELETK                       | 13.1 | 660.3 | 818.4 | 35 | 22 |
| SLC29A2 | SSQAQAQELETK                       | 13.1 | 660.3 | 377.2 | 35 | 22 |
| SLC29A2 | SSQAQAQELETK                       | 13.1 | 660.3 | 248.2 | 35 | 22 |
| SLC29A2 | SSQAQAQELET <u>K</u>               | 13.1 | 664.3 | 374.2 | 35 | 22 |
| SLC29A2 | SSQAQAQELET <u>K</u>               | 13.1 | 664.3 | 256.2 | 35 | 22 |
| SLC47A1 | A <u>C</u> QQAQVHANLK              | 12.5 | 456.6 | 232.1 | 35 | 17 |
| SLC47A1 | A <u>C</u> QQAQVHANLK              | 12.5 | 456.6 | 445.3 | 35 | 17 |
| SLC47A1 | A <u>C</u> QQAQVHANLK              | 12.5 | 456.6 | 648.8 | 35 | 17 |
| SLC47A1 | A <u>C</u> QQAQVHANL <u>K</u>      | 12.5 | 459.2 | 232.1 | 35 | 17 |
| SLC47A1 | A <u>C</u> QQAQVHANL <u>K</u>      | 12.5 | 459.2 | 453.3 | 35 | 17 |
| SLC47A1 | GGPEATLEVR                         | 19.3 | 514.8 | 688.4 | 35 | 17 |
| SLC47A1 | GGPEATLEVR                         | 19.3 | 514.8 | 617.4 | 35 | 17 |
| SLC47A1 | GGPEATLEVR                         | 19.3 | 514.8 | 516.3 | 35 | 17 |
| SLC47A1 | GGPEATLEVR <u>R</u>                | 19.3 | 519.8 | 698.4 | 35 | 17 |
| SLC47A1 | GGPEATLEVR <u>R</u>                | 19.3 | 519.8 | 627.4 | 35 | 17 |
| SLC47A1 | QEEPLPEHPQDGAK                     | 14.1 | 525.6 | 258.1 | 35 | 19 |
| SLC47A1 | QEEPLPEHPQDGAK                     | 14.1 | 525.6 | 615.3 | 35 | 19 |
| SLC47A1 | QEEPLPEHPQDGAK                     | 14.1 | 525.6 | 659.3 | 35 | 19 |
| SLC47A1 | QEEPLPEHPQDGAK                     | 14.1 | 525.6 | 594.8 | 35 | 19 |
| SLC47A1 | QEEPLPEHPQDGAK                     | 14.1 | 525.6 | 489.7 | 35 | 19 |
| SLC47A1 | QEEPLPEHPQDGAK <u>K</u>            | 14.1 | 528.3 | 623.3 | 35 | 19 |
| SLC47A1 | QEEPLPEHPQDGAK <u>K</u>            | 14.1 | 528.3 | 493.7 | 35 | 19 |
| SLC47A2 | SE <u>C</u> HVDFFR                 | 24.1 | 399.5 | 217.1 | 35 | 10 |
| SLC47A2 | SE <u>C</u> HVDFFR                 | 24.1 | 399.5 | 469.3 | 35 | 10 |
| SLC47A2 | SE <u>C</u> HVDFFR                 | 24.1 | 399.5 | 490.7 | 35 | 10 |
| SLC47A2 | SE <u>C</u> HVDFFR <u>R</u>        | 24.1 | 402.8 | 217.1 | 35 | 10 |
| SLC47A2 | SE <u>C</u> HVDFFR <u>R</u>        | 24.1 | 402.8 | 495.7 | 35 | 10 |
| SLC47A2 | TPEEAHALSAPTSR                     | 14.9 | 489.6 | 618.3 | 35 | 18 |
| SLC47A2 | TPEEAHALSAPTSR                     | 14.9 | 489.6 | 531.3 | 35 | 18 |
| SLC47A2 | TPEEAHALSAPTSR                     | 14.9 | 489.6 | 460.3 | 35 | 18 |
| SLC47A2 | TPEEAHALSAPTSR <u>R</u>            | 14.9 | 492.9 | 628.3 | 35 | 18 |
| SLC47A2 | TPEEAHALSAPTSR <u>R</u>            | 14.9 | 492.9 | 470.3 | 35 | 18 |
| SLCO1A2 | <u>C</u> HLPGENASSGTIELTK          | 21.4 | 648.3 | 411.2 | 35 | 24 |
| SLCO1A2 | <u>C</u> HLPGENASSGTIELTK          | 21.4 | 648.3 | 603.4 | 35 | 24 |
| SLCO1A2 | <u>C</u> HLPGENASSGTIELTK          | 21.4 | 648.3 | 490.3 | 35 | 24 |
| SLCO1A2 | <u>C</u> HLPGENASSGTIELTK          | 21.4 | 648.3 | 377.2 | 35 | 24 |
| SLCO1A2 | <u>C</u> HLPGENASSGTIELTK          | 21.4 | 648.3 | 248.2 | 35 | 24 |
| SLCO1A2 | <u>C</u> HLPGENASSGTIELTK <u>K</u> | 21.4 | 651.0 | 385.2 | 35 | 24 |
| SLCO1A2 | <u>C</u> HLPGENASSGTIELTK <u>K</u> | 21.4 | 651.0 | 256.2 | 35 | 24 |
| SLCO1A2 | EGLETNADIIK                        | 22.8 | 601.8 | 903.5 | 35 | 16 |
| SLCO1A2 | EGLETNADIIK                        | 22.8 | 601.8 | 774.4 | 35 | 16 |
| SLCO1A2 | EGLETNADIIK                        | 22.8 | 601.8 | 673.4 | 35 | 16 |
| SLCO1A2 | EGLETNADIIK                        | 22.8 | 601.8 | 559.3 | 35 | 16 |
| SLCO1A2 | EGLETNADIIK                        | 22.8 | 601.8 | 488.3 | 35 | 16 |
| SLCO1A2 | EGLETNADIIK                        | 22.8 | 601.8 | 260.2 | 35 | 16 |
| SLCO1A2 | EGLETNADIIK <u>K</u>               | 22.8 | 605.8 | 782.4 | 35 | 16 |
| SLCO1A2 | EGLETNADIIK <u>K</u>               | 22.8 | 605.8 | 268.2 | 35 | 16 |
| SLCO1B1 | NVTGFFQSFK                         | 33.7 | 587.8 | 214.1 | 35 | 14 |

|         |                   |      |       |        |    |    |
|---------|-------------------|------|-------|--------|----|----|
| SLCO1B1 | NVTGFFQSFK        | 33.7 | 587.8 | 315.2  | 35 | 14 |
| SLCO1B1 | NVTGFFQSFK        | 33.7 | 587.8 | 961.5  | 35 | 14 |
| SLCO1B1 | NVTGFFQSFK        | 33.7 | 591.8 | 214.1  | 35 | 14 |
| SLCO1B1 | NVTGFFQSFK        | 33.7 | 591.8 | 969.5  | 35 | 14 |
| SLCO1B3 | IYNSVFFGR         | 24.5 | 551.8 | 277.2  | 35 | 18 |
| SLCO1B3 | IYNSVFFGR         | 24.5 | 551.8 | 826.4  | 35 | 18 |
| SLCO1B3 | IYNSVFFGR         | 24.5 | 551.8 | 413.7  | 35 | 18 |
| SLCO1B3 | IYNSVFFGR         | 24.5 | 556.8 | 277.2  | 35 | 18 |
| SLCO1B3 | IYNSVFFGR         | 24.5 | 556.8 | 418.7  | 35 | 18 |
| SLCO1B3 | NQTANLTNQGK       | 11.7 | 594.8 | 243.1  | 35 | 19 |
| SLCO1B3 | NQTANLTNQGK       | 11.7 | 594.8 | 344.2  | 35 | 19 |
| SLCO1B3 | NQTANLTNQGK       | 11.7 | 594.8 | 946.5  | 35 | 19 |
| SLCO1B3 | NQTANLTNQGK       | 11.7 | 594.8 | 845.4  | 35 | 19 |
| SLCO1B3 | NQTANLTNQGK       | 11.7 | 594.8 | 774.4  | 35 | 19 |
| SLCO1B3 | NQTANLTNQGK       | 11.7 | 598.8 | 243.1  | 35 | 19 |
| SLCO1B3 | NQTANLTNQGK       | 11.7 | 598.8 | 954.5  | 35 | 19 |
| SLCO1B3 | WSTNSCGAQQGACR    | 13.7 | 727.8 | 274.1  | 35 | 24 |
| SLCO1B3 | WSTNSCGAQQGACR    | 13.7 | 727.8 | 1181.5 | 35 | 24 |
| SLCO1B3 | WSTNSCGAQQGACR    | 13.7 | 727.8 | 1080.4 | 35 | 24 |
| SLCO1B3 | WSTNSCGAQQGACR    | 13.7 | 727.8 | 966.4  | 35 | 24 |
| SLCO1B3 | WSTNSCGAQQGACR    | 13.7 | 732.8 | 274.1  | 35 | 24 |
| SLCO1B3 | WSTNSCGAQQGACR    | 13.7 | 732.8 | 1090.4 | 35 | 24 |
| SLCO2B1 | ASDPDQDVRPSVFHNIK | 21.7 | 477.5 | 549.3  | 35 | 12 |
| SLCO2B1 | ASDPDQDVRPSVFHNIK | 21.7 | 477.5 | 471.3  | 35 | 12 |
| SLCO2B1 | ASDPDQDVRPSVFHNIK | 21.7 | 477.5 | 512.9  | 35 | 12 |
| SLCO2B1 | ASDPDQDVRPSVFHNIK | 21.7 | 477.5 | 437.9  | 35 | 12 |
| SLCO2B1 | ASDPDQDVRPSVFHNIK | 21.7 | 479.5 | 515.6  | 35 | 12 |
| SLCO2B1 | ASDPDQDVRPSVFHNIK | 21.7 | 479.5 | 440.6  | 35 | 12 |
| SLCO2B1 | SSPAVEQQLLVSGPGK  | 24.1 | 798.9 | 445.2  | 35 | 22 |
| SLCO2B1 | SSPAVEQQLLVSGPGK  | 24.1 | 798.9 | 358.2  | 35 | 22 |
| SLCO2B1 | SSPAVEQQLLVSGPGK  | 24.1 | 798.9 | 711.9  | 35 | 22 |
| SLCO2B1 | SSPAVEQQLLVSGPGK  | 24.1 | 802.9 | 366.2  | 35 | 22 |
| SLCO2B1 | SSPAVEQQLLVSGPGK  | 24.1 | 802.9 | 715.9  | 35 | 22 |
| SLCO2B1 | VLAVTDSPAR        | 17.2 | 514.8 | 284.2  | 35 | 13 |
| SLCO2B1 | VLAVTDSPAR        | 17.2 | 514.8 | 816.4  | 35 | 13 |
| SLCO2B1 | VLAVTDSPAR        | 17.2 | 514.8 | 646.3  | 35 | 13 |
| SLCO2B1 | VLAVTDSPAR        | 17.2 | 519.8 | 213.2  | 35 | 13 |
| SLCO2B1 | VLAVTDSPAR        | 17.2 | 519.8 | 284.2  | 35 | 13 |
| SLCO4C1 | ENAVVTNVLAEQDLNK  | 27.0 | 879.0 | 315.1  | 35 | 32 |
| SLCO4C1 | ENAVVTNVLAEQDLNK  | 27.0 | 879.0 | 414.2  | 35 | 32 |
| SLCO4C1 | ENAVVTNVLAEQDLNK  | 27.0 | 879.0 | 930.5  | 35 | 32 |
| SLCO4C1 | ENAVVTNVLAEQDLNK  | 27.0 | 879.0 | 817.4  | 35 | 32 |
| SLCO4C1 | ENAVVTNVLAEQDLNK  | 27.0 | 879.0 | 261.2  | 35 | 32 |
| SLCO4C1 | ENAVVTNVLAEQDLNK  | 27.0 | 883.0 | 315.1  | 35 | 32 |
| SLCO4C1 | ENAVVTNVLAEQDLNK  | 27.0 | 883.0 | 269.2  | 35 | 32 |
| SLCO4C1 | GIENLAFVPSSPDILR  | 35.7 | 864.5 | 844.5  | 35 | 28 |
| SLCO4C1 | GIENLAFVPSSPDILR  | 35.7 | 864.5 | 1201.7 | 35 | 28 |
| SLCO4C1 | GIENLAFVPSSPDILR  | 35.7 | 864.5 | 983.6  | 35 | 28 |
| SLCO4C1 | GIENLAFVPSSPDILR  | 35.7 | 864.5 | 884.5  | 35 | 28 |
| SLCO4C1 | GIENLAFVPSSPDILR  | 35.7 | 869.5 | 993.6  | 35 | 28 |

|         |                                    |      |       |       |    |    |
|---------|------------------------------------|------|-------|-------|----|----|
| SLCO4C1 | GIENLAFVPSSPDIL <u>R</u>           | 35.7 | 869.5 | 894.5 | 35 | 28 |
| SLCO4C1 | HLPGTAEIQAGK                       | 16.4 | 407.9 | 577.3 | 35 | 14 |
| SLCO4C1 | HLPGTAEIQAGK                       | 16.4 | 407.9 | 353.7 | 35 | 14 |
| SLCO4C1 | HLPGTAEIQAGK                       | 16.4 | 407.9 | 516.3 | 35 | 14 |
| SLCO4C1 | HLPGTAEIQAGK                       | 16.4 | 407.9 | 275.2 | 35 | 14 |
| SLCO4C1 | HLPGTAEIQAG <u>K</u>               | 16.4 | 410.6 | 524.3 | 35 | 14 |
| SLCO4C1 | HLPGTAEIQAG <u>K</u>               | 16.4 | 410.6 | 283.2 | 35 | 14 |
| SULT1A1 | SLPEETVDFVQHTSFK                   | 37.1 | 655.0 | 201.1 | 35 | 15 |
| SULT1A1 | SLPEETVDFVQHTSFK                   | 37.1 | 655.0 | 427.2 | 35 | 15 |
| SULT1A1 | SLPEETVDFVQHTSFK                   | 37.1 | 655.0 | 945.5 | 35 | 15 |
| SULT1A1 | SLPEETVDFVQHTS <u>F</u> <u>K</u>   | 37.1 | 657.7 | 201.1 | 35 | 15 |
| SULT1A1 | SLPEETVDFVQHTS <u>F</u> <u>K</u>   | 37.1 | 657.7 | 854.5 | 35 | 15 |
| SULT1A1 | VHPEPGTWDSFLEK                     | 30.1 | 821.4 | 237.1 | 35 | 30 |
| SULT1A1 | VHPEPGTWDSFLEK                     | 30.1 | 821.4 | 703.3 | 35 | 30 |
| SULT1A1 | VHPEPGTWDSFLEK                     | 30.1 | 547.9 | 237.1 | 35 | 20 |
| SULT1A1 | VHPEPGTWDSFLE <u>K</u>             | 30.1 | 825.4 | 237.1 | 35 | 30 |
| SULT1A1 | VHPEPGTWDSFLE <u>K</u>             | 30.1 | 550.6 | 237.1 | 35 | 20 |
| SULT1A2 | FDADYAK                            | 15.5 | 415.2 | 263.1 | 35 | 10 |
| SULT1A2 | FDADYAK                            | 15.5 | 415.2 | 334.1 | 35 | 10 |
| SULT1A2 | FDADYAK                            | 15.5 | 415.2 | 449.2 | 35 | 10 |
| SULT1A2 | FDADYAK                            | 15.5 | 415.2 | 682.3 | 35 | 10 |
| SULT1A2 | FDADYAK                            | 15.5 | 415.2 | 567.3 | 35 | 10 |
| SULT1A2 | FDADY <u>A</u> <u>K</u>            | 15.5 | 419.2 | 263.1 | 35 | 10 |
| SULT1A2 | FDADY <u>A</u> <u>K</u>            | 15.5 | 419.2 | 575.3 | 35 | 10 |
| SULT1A2 | VYPHPGTWESFLEK                     | 31.8 | 563.9 | 623.3 | 35 | 12 |
| SULT1A2 | VYPHPGTWESFLEK                     | 31.8 | 563.9 | 795.9 | 35 | 12 |
| SULT1A2 | VYPHPGTWESFLEK                     | 31.8 | 563.9 | 714.4 | 35 | 12 |
| SULT1A2 | VYPHPGTWESFLEK                     | 31.8 | 563.9 | 597.3 | 35 | 12 |
| SULT1A2 | VYPHPGTWESFLE <u>K</u>             | 31.8 | 566.6 | 718.4 | 35 | 12 |
| SULT1A2 | VYPHPGTWESFLE <u>K</u>             | 31.8 | 566.6 | 601.3 | 35 | 12 |
| SULT1A3 | AHPEPGTWDSFLEK                     | 29.7 | 538.6 | 209.1 | 35 | 20 |
| SULT1A3 | AHPEPGTWDSFLEK                     | 29.7 | 538.6 | 690.3 | 35 | 20 |
| SULT1A3 | AHPEPGTWDSFLEK                     | 29.7 | 538.6 | 345.7 | 35 | 20 |
| SULT1A3 | AHPEPGTWDSFLEK                     | 29.7 | 538.6 | 924.4 | 35 | 20 |
| SULT1A3 | AHPEPGTWDSFLEK                     | 29.7 | 538.6 | 738.4 | 35 | 20 |
| SULT1A3 | AHPEPGTWDSFLE <u>K</u>             | 29.7 | 541.3 | 209.1 | 35 | 20 |
| SULT1A3 | AHPEPGTWDSFLE <u>K</u>             | 29.7 | 541.3 | 746.4 | 35 | 20 |
| SULT1A3 | DVAVSYYHFHR                        | 21.1 | 349.2 | 215.1 | 35 | 8  |
| SULT1A3 | DVAVSYYHFHR                        | 21.1 | 349.2 | 286.1 | 35 | 8  |
| SULT1A3 | DVAVSYYHFHR                        | 21.1 | 349.2 | 385.2 | 35 | 8  |
| SULT1A3 | DVAVSYYHFHR                        | 21.1 | 349.2 | 236.6 | 35 | 8  |
| SULT1A3 | DVAVSYYHFHR                        | 21.1 | 349.2 | 596.3 | 35 | 8  |
| SULT1A3 | DVAVSYYHFHR                        | 21.1 | 349.2 | 459.2 | 35 | 8  |
| SULT1A3 | DVAVSYYHF <u>H</u> <u>R</u>        | 21.1 | 351.7 | 215.1 | 35 | 8  |
| SULT1A3 | DVAVSYYHF <u>H</u> <u>R</u>        | 21.1 | 351.7 | 385.2 | 35 | 8  |
| SULT1B1 | IEQFHSRPDDIVIATYPK                 | 24.7 | 533.0 | 613.3 | 35 | 14 |
| SULT1B1 | IEQFHSRPDDIVIATYPK                 | 24.7 | 533.0 | 669.8 | 35 | 14 |
| SULT1B1 | IEQFHSRPDDIVIATYPK                 | 24.7 | 533.0 | 719.4 | 35 | 14 |
| SULT1B1 | IEQFHSRPDDIVIATY <u>P</u> <u>K</u> | 24.7 | 535.0 | 669.8 | 35 | 14 |
| SULT1B1 | IEQFHSRPDDIVIATY <u>P</u> <u>K</u> | 24.7 | 535.0 | 719.4 | 35 | 14 |



|            |                       |      |       |        |    |    |
|------------|-----------------------|------|-------|--------|----|----|
| SULT1B1    | NYFTVAQNEK            | 21.7 | 607.3 | 278.1  | 35 | 15 |
| SULT1B1    | NYFTVAQNEK            | 21.7 | 607.3 | 425.2  | 35 | 15 |
| SULT1B1    | NYFTVAQNEK            | 21.7 | 607.3 | 789.4  | 35 | 15 |
| SULT1B1    | NYFTVAQNE <u>K</u>    | 21.7 | 611.3 | 278.1  | 35 | 15 |
| SULT1B1    | NYFTVAQNE <u>K</u>    | 21.7 | 611.3 | 425.2  | 35 | 15 |
| SULT1B1    | THLPTDLLPK            | 26.6 | 567.8 | 239.1  | 35 | 19 |
| SULT1B1    | THLPTDLLPK            | 26.6 | 567.8 | 352.2  | 35 | 19 |
| SULT1B1    | THLPTDLLPK            | 26.6 | 567.8 | 244.2  | 35 | 19 |
| SULT1B1    | THLPTDLLP <u>K</u>    | 26.6 | 571.8 | 239.1  | 35 | 19 |
| SULT1B1    | THLPTDLLP <u>K</u>    | 26.6 | 571.8 | 352.2  | 35 | 19 |
| SULT1C1/C2 | IVQETSFEK             | 17.0 | 540.8 | 341.2  | 35 | 14 |
| SULT1C1/C2 | IVQETSFEK             | 17.0 | 540.8 | 868.4  | 35 | 14 |
| SULT1C1/C2 | IVQETSFEK             | 17.0 | 540.8 | 484.2  | 35 | 14 |
| SULT1C1/C2 | IVQETSFE <u>K</u>     | 17.0 | 544.8 | 341.2  | 35 | 14 |
| SULT1C1/C2 | IVQETSFE <u>K</u>     | 17.0 | 544.8 | 876.4  | 35 | 14 |
| SULT1C1/C2 | NHFTVAQNER            | 13.3 | 405.9 | 546.3  | 35 | 7  |
| SULT1C1/C2 | NHFTVAQNER            | 13.3 | 405.9 | 418.2  | 35 | 7  |
| SULT1C1/C2 | NHFTVAQNER            | 13.3 | 405.9 | 309.2  | 35 | 7  |
| SULT1C1/C2 | NHFTVAQNE <u>R</u>    | 13.3 | 409.2 | 314.2  | 35 | 7  |
| SULT1C1/C2 | NHFTVAQNE <u>R</u>    | 13.3 | 409.2 | 314.2  | 35 | 7  |
| SULT1C1/C2 | VWGSWFDHVK            | 34.1 | 453.9 | 630.8  | 35 | 12 |
| SULT1C1/C2 | VWGSWFDHVK            | 34.1 | 453.9 | 581.3  | 35 | 12 |
| SULT1C1/C2 | VWGSWFDHVK            | 34.1 | 453.9 | 488.2  | 35 | 12 |
| SULT1C1/C2 | VWGSWFDHV <u>K</u>    | 34.1 | 456.6 | 585.3  | 35 | 12 |
| SULT1C1/C2 | VWGSWFDHV <u>K</u>    | 34.1 | 456.6 | 492.2  | 35 | 12 |
| SULT1E1    | LIHFLER               | 25.0 | 464.3 | 364.2  | 35 | 15 |
| SULT1E1    | LIHFLER               | 25.0 | 464.3 | 701.4  | 35 | 15 |
| SULT1E1    | LIHFLER               | 25.0 | 464.3 | 351.2  | 35 | 15 |
| SULT1E1    | LIHFLER <u>R</u>      | 25.0 | 469.3 | 574.3  | 35 | 15 |
| SULT1E1    | LIHFLER <u>R</u>      | 25.0 | 469.3 | 356.2  | 35 | 15 |
| SULT1E1    | NHFTVALNEK            | 19.7 | 586.8 | 399.2  | 35 | 15 |
| SULT1E1    | NHFTVALNEK            | 19.7 | 586.8 | 921.5  | 35 | 15 |
| SULT1E1    | NHFTVALNEK            | 19.7 | 586.8 | 774.4  | 35 | 15 |
| SULT1E1    | NHFTVALNEK            | 19.7 | 586.8 | 574.3  | 35 | 15 |
| SULT1E1    | NHFTVALNE <u>K</u>    | 19.7 | 590.8 | 399.2  | 35 | 15 |
| SULT1E1    | NHFTVALNE <u>K</u>    | 19.7 | 590.8 | 582.3  | 35 | 15 |
| SULT2A1    | LFSSHLPIQLFPK         | 35.1 | 763.9 | 842.5  | 35 | 25 |
| SULT2A1    | LFSSHLPIQLFPK         | 35.1 | 763.9 | 391.2  | 35 | 25 |
| SULT2A1    | LFSSHLPIQLFPK         | 35.1 | 763.9 | 244.2  | 35 | 25 |
| SULT2A1    | LFSSHLPIQLFP <u>K</u> | 35.1 | 767.9 | 399.2  | 35 | 25 |
| SULT2A1    | LFSSHLPIQLFP <u>K</u> | 35.1 | 767.9 | 252.2  | 35 | 25 |
| SULT2A1    | NHFTVAQAEDFDK         | 21.9 | 761.4 | 399.2  | 35 | 25 |
| SULT2A1    | NHFTVAQAEDFDK         | 21.9 | 761.4 | 1270.6 | 35 | 25 |
| SULT2A1    | NHFTVAQAEDFDK         | 21.9 | 761.4 | 1123.5 | 35 | 25 |
| SULT2A1    | NHFTVAQAEDFD <u>K</u> | 21.9 | 765.4 | 399.2  | 35 | 25 |
| SULT2A1    | NHFTVAQAEDFD <u>K</u> | 21.9 | 765.4 | 1131.5 | 35 | 25 |
| SULT2A1    | TLEPEELNLILK          | 35.2 | 706.4 | 344.2  | 35 | 18 |
| SULT2A1    | TLEPEELNLILK          | 35.2 | 706.4 | 1068.6 | 35 | 18 |
| SULT2A1    | TLEPEELNLILK          | 35.2 | 706.4 | 260.2  | 35 | 18 |
| SULT2A1    | TLEPEELNLIL <u>K</u>  | 35.2 | 710.4 | 344.2  | 35 | 18 |

|         |                                       |      |        |        |    |    |
|---------|---------------------------------------|------|--------|--------|----|----|
| SULT2A1 | TLEPEELNLIL <u>K</u>                  | 35.2 | 710.4  | 1076.6 | 35 | 18 |
| SULT2B1 | APW <u>C</u> ETIVGAFSLPDQYSPR         | 40.0 | 1147.5 | 1337.6 | 35 | 34 |
| SULT2B1 | APW <u>C</u> ETIVGAFSLPDQYSPR         | 40.0 | 1147.5 | 862.4  | 35 | 34 |
| SULT2B1 | APW <u>C</u> ETIVGAFSLPDQYSPR         | 40.0 | 765.4  | 862.4  | 35 | 20 |
| SULT2B1 | APW <u>C</u> ETIVGAFSLPDQYSPR         | 40.0 | 765.4  | 431.7  | 35 | 20 |
| SULT2B1 | APW <u>C</u> ETIVGAFSLPDQYSP <u>R</u> | 40.0 | 1152.6 | 872.4  | 35 | 34 |
| SULT2B1 | APW <u>C</u> ETIVGAFSLPDQYSP <u>R</u> | 40.0 | 768.7  | 872.4  | 35 | 20 |
| SULT2B1 | APW <u>C</u> ETIVGAFSLPDQYSP <u>R</u> | 40.0 | 768.7  | 436.7  | 35 | 20 |
| SULT2B1 | GEVQFGSWFDHIK                         | 34.3 | 775.4  | 1136.6 | 35 | 25 |
| SULT2B1 | GEVQFGSWFDHIK                         | 34.3 | 775.4  | 989.5  | 35 | 25 |
| SULT2B1 | GEVQFGSWFDHIK                         | 34.3 | 775.4  | 397.3  | 35 | 25 |
| SULT2B1 | GEVQFGSWFDHIK                         | 34.3 | 775.4  | 682.3  | 35 | 25 |
| SULT2B1 | GEVQFGSWFDHIK                         | 34.3 | 775.4  | 632.8  | 35 | 25 |
| SULT2B1 | GEVQFGSWFDHI <u>K</u>                 | 34.3 | 779.4  | 997.5  | 35 | 25 |
| SULT2B1 | GEVQFGSWFDHI <u>K</u>                 | 34.3 | 779.4  | 405.3  | 35 | 25 |
| SULT2B1 | NHFTVAQSEAFDR                         | 20.7 | 507.9  | 670.3  | 35 | 14 |
| SULT2B1 | NHFTVAQSEAFDR                         | 20.7 | 507.9  | 335.7  | 35 | 14 |
| SULT2B1 | NHFTVAQSEAFDR                         | 20.7 | 507.9  | 437.2  | 35 | 14 |
| SULT2B1 | NHFTVAQSEAFDR <u>R</u>                | 20.7 | 511.2  | 734.3  | 35 | 14 |
| SULT2B1 | NHFTVAQSEAFDR <u>R</u>                | 20.7 | 511.2  | 518.3  | 35 | 14 |
| SULT4A1 | DLVVSYYQFHR                           | 27.6 | 713.9  | 1099.5 | 35 | 23 |
| SULT4A1 | DLVVSYYQFHR                           | 27.6 | 713.9  | 1000.5 | 35 | 23 |
| SULT4A1 | DLVVSYYQFHR                           | 27.6 | 713.9  | 550.3  | 35 | 23 |
| SULT4A1 | DLVVSYYQFHR <u>R</u>                  | 27.6 | 718.9  | 1010.5 | 35 | 23 |
| SULT4A1 | DLVVSYYQFHR <u>R</u>                  | 27.6 | 718.9  | 555.3  | 35 | 23 |
| SULT4A1 | FLPSDLHNGDSK                          | 18.5 | 443.9  | 261.2  | 35 | 11 |
| SULT4A1 | FLPSDLHNGDSK                          | 18.5 | 443.9  | 560.3  | 35 | 11 |
| SULT4A1 | FLPSDLHNGDSK                          | 18.5 | 443.9  | 657.3  | 35 | 11 |
| SULT4A1 | FLPSDLHNGDSK                          | 18.5 | 443.9  | 234.1  | 35 | 11 |
| SULT4A1 | FLPSDLHNGDSK                          | 18.5 | 443.9  | 591.8  | 35 | 11 |
| SULT4A1 | FLPSDLHNGDSK                          | 18.5 | 443.9  | 535.2  | 35 | 11 |
| SULT4A1 | FLPSDLHNGDS <u>K</u>                  | 18.5 | 446.6  | 242.2  | 35 | 11 |
| SULT4A1 | FLPSDLHNGDS <u>K</u>                  | 18.5 | 446.6  | 539.3  | 35 | 11 |
| SULT4A1 | YFEFHGVR                              | 23.8 | 352.2  | 311.1  | 35 | 13 |
| SULT4A1 | YFEFHGVR                              | 23.8 | 352.2  | 331.2  | 35 | 13 |
| SULT4A1 | YFEFHGVR                              | 23.8 | 352.2  | 446.2  | 35 | 13 |
| SULT4A1 | YFEFHGVR                              | 23.8 | 352.2  | 372.7  | 35 | 13 |
| SULT4A1 | YFEFHGVR                              | 23.8 | 352.2  | 308.2  | 35 | 13 |
| SULT4A1 | YFEFHGVR <u>R</u>                     | 23.8 | 355.5  | 341.2  | 35 | 13 |
| SULT4A1 | YFEFHGVR <u>R</u>                     | 23.8 | 355.5  | 451.2  | 35 | 13 |
| TPMT    | NQVLTLEEWQDK                          | 33.7 | 751.9  | 1048.5 | 35 | 24 |
| TPMT    | NQVLTLEEWQDK                          | 33.7 | 751.9  | 947.4  | 35 | 24 |
| TPMT    | NQVLTLEEWQDK                          | 33.7 | 751.9  | 834.4  | 35 | 24 |
| TPMT    | NQVLTLEEWQDK                          | 33.7 | 751.9  | 705.3  | 35 | 24 |
| TPMT    | NQVLTLEEWQDK                          | 33.7 | 751.9  | 576.3  | 35 | 24 |
| TPMT    | NQVLTLEEWQD <u>K</u>                  | 33.7 | 755.9  | 1056.5 | 35 | 24 |
| TPMT    | NQVLTLEEWQD <u>K</u>                  | 33.7 | 755.9  | 955.5  | 35 | 24 |
| TPMT    | NQVLTLEEWQD <u>K</u>                  | 33.7 | 755.9  | 842.4  | 35 | 24 |
| TPMT    | NQVLTLEEWQD <u>K</u>                  | 33.7 | 755.9  | 713.3  | 35 | 24 |
| TPMT    | NQVLTLEEWQD <u>K</u>                  | 33.7 | 755.9  | 584.3  | 35 | 24 |

|         |                                                |      |       |        |    |    |
|---------|------------------------------------------------|------|-------|--------|----|----|
| TPMT    | SWGID <u>C</u> LFEK                            | 33.6 | 627.8 | 331.1  | 35 | 17 |
| TPMT    | SWGID <u>C</u> LFEK                            | 33.6 | 627.8 | 444.2  | 35 | 17 |
| TPMT    | SWGID <u>C</u> LFEK                            | 33.6 | 627.8 | 811.4  | 35 | 17 |
| TPMT    | SWGID <u>C</u> LFEK                            | 33.6 | 627.8 | 536.3  | 35 | 17 |
| TPMT    | SWGID <u>C</u> LFEK                            | 33.6 | 627.8 | 584.3  | 35 | 17 |
| TPMT    | SWGID <u>C</u> LFE <u>K</u>                    | 33.6 | 631.8 | 331.1  | 35 | 17 |
| TPMT    | SWGID <u>C</u> LFE <u>K</u>                    | 33.6 | 631.8 | 819.4  | 35 | 17 |
| TPMT    | TAFHQEQGHQLLK                                  | 15.7 | 768.9 | 582.8  | 35 | 30 |
| TPMT    | TAFHQEQGHQLLK                                  | 15.7 | 768.9 | 682.9  | 35 | 30 |
| TPMT    | TAFHQEQGHQLLK                                  | 15.7 | 768.9 | 609.3  | 35 | 30 |
| TPMT    | TAFHQEQGHQLL <u>K</u>                          | 15.7 | 772.9 | 582.8  | 35 | 30 |
| TPMT    | TAFHQEQGHQLL <u>K</u>                          | 15.7 | 772.9 | 613.3  | 35 | 30 |
| UGT1A1  | ESFVSLGHNVFENDSFLQR                            | 34.9 | 742.4 | 650.4  | 35 | 22 |
| UGT1A1  | ESFVSLGHNVFENDSFLQR                            | 34.9 | 742.4 | 303.2  | 35 | 22 |
| UGT1A1  | ESFVSLGHNVFENDSFLQR                            | 34.9 | 742.4 | 881.9  | 35 | 22 |
| UGT1A1  | ESFVSLGHNVFENDSFLQR                            | 34.9 | 745.7 | 660.4  | 35 | 22 |
| UGT1A1  | ESFVSLGHNVFENDSFLQR                            | 34.9 | 745.7 | 886.9  | 35 | 22 |
| UGT1A1  | GHEIVVLAPDASLYIR                               | 32.1 | 585.0 | 819.5  | 35 | 12 |
| UGT1A1  | GHEIVVLAPDASLYIR                               | 32.1 | 585.0 | 410.2  | 35 | 12 |
| UGT1A1  | GHEIVVLAPDASLYIR                               | 32.1 | 585.0 | 467.8  | 35 | 12 |
| UGT1A1  | GHEIVVLAPDASLYIR                               | 32.1 | 588.3 | 410.2  | 35 | 12 |
| UGT1A1  | GHEIVVLAPDASLYIR                               | 32.1 | 588.3 | 472.8  | 35 | 12 |
| UGT1A10 | TYSTS <sup>T</sup> LEDQNR                      | 19.1 | 789.4 | 1313.6 | 35 | 22 |
| UGT1A10 | TYSTS <sup>T</sup> LEDQNR                      | 19.1 | 789.4 | 1038.5 | 35 | 22 |
| UGT1A10 | TYSTS <sup>T</sup> LEDQNR                      | 19.1 | 789.4 | 875.4  | 35 | 22 |
| UGT1A10 | TYSTS <sup>T</sup> LEDQNR                      | 19.1 | 789.4 | 661.3  | 35 | 22 |
| UGT1A10 | TYSTS <sup>T</sup> LEDQNR                      | 19.1 | 789.4 | 532.2  | 35 | 22 |
| UGT1A10 | TYSTS <sup>T</sup> LEDQNR                      | 19.1 | 794.4 | 885.4  | 35 | 22 |
| UGT1A10 | TYSTS <sup>T</sup> LEDQNR                      | 19.1 | 794.4 | 671.3  | 35 | 22 |
| UGT1A10 | YFSLPSVV <sup>F</sup> TR                       | 37.1 | 658.4 | 398.2  | 35 | 21 |
| UGT1A10 | YFSLPSVV <sup>F</sup> TR                       | 37.1 | 658.4 | 1005.6 | 35 | 21 |
| UGT1A10 | YFSLPSVV <sup>F</sup> TR                       | 37.1 | 658.4 | 805.5  | 35 | 21 |
| UGT1A10 | YFSLPSVV <sup>F</sup> TR                       | 37.1 | 658.4 | 522.3  | 35 | 21 |
| UGT1A10 | YFSLPSVV <sup>F</sup> TR                       | 37.1 | 663.4 | 398.2  | 35 | 21 |
| UGT1A10 | YFSLPSVV <sup>F</sup> TR                       | 37.1 | 663.4 | 815.5  | 35 | 21 |
| UGT1A3  | HLNATSFDV <sup>V</sup> LTDPVNL <u>C</u> AAVLAK | 38.6 | 856.8 | 886.4  | 35 | 21 |
| UGT1A3  | HLNATSFDV <sup>V</sup> LTDPVNL <u>C</u> AAVLAK | 38.6 | 856.8 | 1084.5 | 35 | 21 |
| UGT1A3  | HLNATSFDV <sup>V</sup> LTDPVNL <u>C</u> AAVLAK | 38.6 | 856.8 | 1155.7 | 35 | 21 |
| UGT1A3  | HLNATSFDV <sup>V</sup> LTDPVNL <u>C</u> AAVLAK | 38.6 | 856.8 | 959.5  | 35 | 21 |
| UGT1A3  | HLNATSFDV <sup>V</sup> LTDPVNL <u>C</u> AAVLAK | 38.6 | 859.5 | 1084.5 | 35 | 21 |
| UGT1A3  | HLNATSFDV <sup>V</sup> LTDPVNL <u>C</u> AAVLAK | 38.6 | 859.5 | 1163.7 | 35 | 21 |
| UGT1A4  | FFTLTAYAVPWTQK                                 | 39.1 | 836.9 | 992.5  | 35 | 27 |
| UGT1A4  | FFTLTAYAVPWTQK                                 | 39.1 | 836.9 | 758.4  | 35 | 27 |
| UGT1A4  | FFTLTAYAVPWTQK                                 | 39.1 | 836.9 | 659.4  | 35 | 27 |
| UGT1A4  | FFTLTAYAVPWTQ <u>K</u>                         | 39.1 | 840.9 | 1000.5 | 35 | 27 |
| UGT1A4  | FFTLTAYAVPWTQ <u>K</u>                         | 39.1 | 840.9 | 667.4  | 35 | 27 |
| UGT1A4  | YLSIPAVFFWR                                    | 41.1 | 699.9 | 277.2  | 35 | 23 |
| UGT1A4  | YLSIPAVFFWR                                    | 41.1 | 699.9 | 364.2  | 35 | 23 |
| UGT1A4  | YLSIPAVFFWR                                    | 41.1 | 699.9 | 922.5  | 35 | 23 |
| UGT1A4  | YLSIPAVFFWR                                    | 41.1 | 704.9 | 277.2  | 35 | 23 |

|        |                         |      |       |        |    |    |
|--------|-------------------------|------|-------|--------|----|----|
| UGT1A4 | YLSIPAVFFWR             | 41.1 | 704.9 | 932.5  | 35 | 23 |
| UGT1A5 | EVSVDLVSHASVWLF         | 33.0 | 648.4 | 841.5  | 35 | 19 |
| UGT1A5 | EVSVDLVSHASVWLF         | 33.0 | 648.4 | 720.4  | 35 | 19 |
| UGT1A5 | EVSVDLVSHASVWLF         | 33.0 | 648.4 | 621.4  | 35 | 19 |
| UGT1A5 | EVSVDLVSHASVWLF         | 33.0 | 651.7 | 730.4  | 35 | 19 |
| UGT1A5 | EVSVDLVSHASVWLF         | 33.0 | 651.7 | 631.4  | 35 | 19 |
| UGT1A5 | YLSIPAVFFLR             | 42.2 | 663.4 | 277.2  | 35 | 18 |
| UGT1A5 | YLSIPAVFFLR             | 42.2 | 663.4 | 364.2  | 35 | 18 |
| UGT1A5 | YLSIPAVFFLR             | 42.2 | 663.4 | 239.1  | 35 | 18 |
| UGT1A5 | YLSIPAVFFLR             | 42.2 | 663.4 | 1049.6 | 35 | 18 |
| UGT1A5 | YLSIPAVFFLR             | 42.2 | 663.4 | 962.6  | 35 | 18 |
| UGT1A5 | YLSIPAVFFLR             | 42.2 | 668.4 | 277.2  | 35 | 18 |
| UGT1A5 | YLSIPAVFFLR             | 42.2 | 668.4 | 364.2  | 35 | 18 |
| UGT1A6 | DIVEVLSDR               | 28.8 | 523.3 | 718.4  | 35 | 17 |
| UGT1A6 | DIVEVLSDR               | 28.8 | 523.3 | 589.3  | 35 | 17 |
| UGT1A6 | DIVEVLSDR               | 28.8 | 523.3 | 490.3  | 35 | 17 |
| UGT1A6 | DIVEVLSDR               | 28.8 | 528.3 | 728.4  | 35 | 17 |
| UGT1A6 | DIVEVLSDR               | 28.8 | 528.3 | 500.3  | 35 | 17 |
| UGT1A6 | DVDIITLYQK              | 30.5 | 604.3 | 443.2  | 35 | 20 |
| UGT1A6 | DVDIITLYQK              | 30.5 | 604.3 | 765.5  | 35 | 20 |
| UGT1A6 | DVDIITLYQK              | 30.5 | 604.3 | 652.4  | 35 | 20 |
| UGT1A6 | DVDIITLYQK              | 30.5 | 608.3 | 443.2  | 35 | 20 |
| UGT1A6 | DVDIITLYQK              | 30.5 | 608.3 | 773.5  | 35 | 20 |
| UGT1A6 | SFLTAPQTEYR             | 25.0 | 656.8 | 965.5  | 35 | 17 |
| UGT1A6 | SFLTAPQTEYR             | 25.0 | 656.8 | 864.4  | 35 | 17 |
| UGT1A6 | SFLTAPQTEYR             | 25.0 | 656.8 | 793.4  | 35 | 17 |
| UGT1A6 | SFLTAPQTEYR             | 25.0 | 661.8 | 803.4  | 35 | 17 |
| UGT1A6 | SFLTAPQTEYR             | 25.0 | 661.8 | 348.2  | 35 | 17 |
| UGT1A7 | GIFCHYLEEGAQC PAPLSYVPR | 33.3 | 855.4 | 703.3  | 35 | 26 |
| UGT1A7 | GIFCHYLEEGAQC PAPLSYVPR | 33.3 | 855.4 | 999.6  | 35 | 26 |
| UGT1A7 | GIFCHYLEEGAQC PAPLSYVPR | 33.3 | 855.4 | 831.5  | 35 | 26 |
| UGT1A7 | GIFCHYLEEGAQC PAPLSYVPR | 33.3 | 858.7 | 1009.6 | 35 | 26 |
| UGT1A7 | GIFCHYLEEGAQC PAPLSYVPR | 33.3 | 858.7 | 841.5  | 35 | 26 |
| UGT1A7 | TYSTSYTLEDQDR           | 19.4 | 789.8 | 1314.6 | 35 | 22 |
| UGT1A7 | TYSTSYTLEDQDR           | 19.4 | 789.8 | 876.4  | 35 | 22 |
| UGT1A7 | TYSTSYTLEDQDR           | 19.4 | 789.8 | 775.4  | 35 | 22 |
| UGT1A7 | TYSTSYTLEDQDR           | 19.4 | 789.8 | 662.3  | 35 | 22 |
| UGT1A7 | TYSTSYTLEDQDR           | 19.4 | 794.9 | 886.4  | 35 | 22 |
| UGT1A7 | TYSTSYTLEDQDR           | 19.4 | 794.9 | 785.4  | 35 | 22 |
| UGT1A8 | GIACHYLEEGAQC PAPLSYVPR | 29.2 | 830.1 | 601.3  | 35 | 21 |
| UGT1A8 | GIACHYLEEGAQC PAPLSYVPR | 29.2 | 830.1 | 665.3  | 35 | 21 |
| UGT1A8 | GIACHYLEEGAQC PAPLSYVPR | 29.2 | 830.1 | 999.6  | 35 | 21 |
| UGT1A8 | GIACHYLEEGAQC PAPLSYVPR | 29.2 | 830.1 | 831.5  | 35 | 21 |
| UGT1A8 | GIACHYLEEGAQC PAPLSYVPR | 29.2 | 833.4 | 1009.6 | 35 | 21 |
| UGT1A8 | GIACHYLEEGAQC PAPLSYVPR | 29.2 | 833.4 | 841.5  | 35 | 21 |
| UGT1A9 | AFAHAQWK                | 17.0 | 320.2 | 444.2  | 35 | 7  |
| UGT1A9 | AFAHAQWK                | 17.0 | 320.2 | 370.7  | 35 | 7  |
| UGT1A9 | AFAHAQWK                | 17.0 | 320.2 | 335.2  | 35 | 7  |
| UGT1A9 | AFAHAQWK                | 17.0 | 322.8 | 448.2  | 35 | 7  |
| UGT1A9 | AFAHAQWK                | 17.0 | 322.8 | 374.7  | 35 | 7  |

|         |                           |      |       |        |    |    |
|---------|---------------------------|------|-------|--------|----|----|
| UGT2A1  | ANLIASALAQIPQK            | 31.4 | 719.4 | 1026.6 | 35 | 19 |
| UGT2A1  | ANLIASALAQIPQK            | 31.4 | 719.4 | 955.6  | 35 | 19 |
| UGT2A1  | ANLIASALAQIPQK            | 31.4 | 719.4 | 797.5  | 35 | 19 |
| UGT2A1  | ANLIASALAQIPQK            | 31.4 | 719.4 | 684.4  | 35 | 19 |
| UGT2A1  | ANLIASALAQIPQK            | 31.4 | 719.4 | 372.2  | 35 | 19 |
| UGT2A1  | ANLIASALAQIPQK            | 31.4 | 723.4 | 805.5  | 35 | 19 |
| UGT2A1  | ANLIASALAQIPQK            | 31.4 | 723.4 | 380.2  | 35 | 19 |
| UGT2A1  | KPATLGNNTQLFDWIPQNDLLGHPK | 36.5 | 705.1 | 226.2  | 35 | 21 |
| UGT2A1  | KPATLGNNTQLFDWIPQNDLLGHPK | 36.5 | 705.1 | 551.3  | 35 | 21 |
| UGT2A1  | KPATLGNNTQLFDWIPQNDLLGHPK | 36.5 | 705.1 | 438.2  | 35 | 21 |
| UGT2A1  | KPATLGNNTQLFDWIPQNDLLGHPK | 36.5 | 705.1 | 244.2  | 35 | 21 |
| UGT2A1  | KPATLGNNTQLFDWIPQNDLLGHPK | 36.5 | 705.1 | 559.8  | 35 | 21 |
| UGT2A1  | KPATLGNNTQLFDWIPQNDLLGHPK | 36.5 | 707.1 | 226.2  | 35 | 21 |
| UGT2A1  | KPATLGNNTQLFDWIPQNDLLGHPK | 36.5 | 707.1 | 563.8  | 35 | 21 |
| UGT2B10 | GHEVTVLASSASILFDPNDSSTLK  | 35.2 | 830.1 | 1123.5 | 35 | 25 |
| UGT2B10 | GHEVTVLASSASILFDPNDSSTLK  | 35.2 | 830.1 | 976.5  | 35 | 25 |
| UGT2B10 | GHEVTVLASSASILFDPNDSSTLK  | 35.2 | 830.1 | 861.4  | 35 | 25 |
| UGT2B10 | GHEVTVLASSASILFDPNDSSTLK  | 35.2 | 832.8 | 984.5  | 35 | 25 |
| UGT2B10 | GHEVTVLASSASILFDPNDSSTLK  | 35.2 | 832.8 | 869.4  | 35 | 25 |
| UGT2B11 | FTPGYTIER                 | 21.5 | 542.3 | 249.1  | 35 | 14 |
| UGT2B11 | FTPGYTIER                 | 21.5 | 542.3 | 835.4  | 35 | 14 |
| UGT2B11 | FTPGYTIER                 | 21.5 | 542.3 | 738.4  | 35 | 14 |
| UGT2B11 | FTPGYTIER                 | 21.5 | 542.3 | 518.3  | 35 | 14 |
| UGT2B11 | FTPGYTIER                 | 21.5 | 542.3 | 418.2  | 35 | 14 |
| UGT2B11 | FTPGYTIER                 | 21.5 | 547.3 | 249.1  | 35 | 14 |
| UGT2B11 | FTPGYTIER                 | 21.5 | 547.3 | 423.2  | 35 | 14 |
| UGT2B11 | GHEVTVLASSASILFDPNDASTLK  | 35.6 | 824.8 | 1107.5 | 35 | 25 |
| UGT2B11 | GHEVTVLASSASILFDPNDASTLK  | 35.6 | 824.8 | 960.5  | 35 | 25 |
| UGT2B11 | GHEVTVLASSASILFDPNDASTLK  | 35.6 | 824.8 | 845.4  | 35 | 25 |
| UGT2B11 | GHEVTVLASSASILFDPNDASTLK  | 35.6 | 827.4 | 1115.5 | 35 | 25 |
| UGT2B11 | GHEVTVLASSASILFDPNDASTLK  | 35.6 | 827.4 | 853.5  | 35 | 25 |
| UGT2B15 | GHEVTVLTSSASTLVNASK       | 26.5 | 634.3 | 419.2  | 35 | 14 |
| UGT2B15 | GHEVTVLTSSASTLVNASK       | 26.5 | 634.3 | 819.5  | 35 | 14 |
| UGT2B15 | GHEVTVLTSSASTLVNASK       | 26.5 | 634.3 | 631.4  | 35 | 14 |
| UGT2B15 | GHEVTVLTSSASTLVNASK       | 26.5 | 634.3 | 518.3  | 35 | 14 |
| UGT2B15 | GHEVTVLTSSASTLVNASK       | 26.5 | 634.3 | 234.1  | 35 | 14 |
| UGT2B15 | GHEVTVLTSSASTLVNASK       | 26.5 | 637.0 | 827.5  | 35 | 14 |
| UGT2B15 | GHEVTVLTSSASTLVNASK       | 26.5 | 637.0 | 526.3  | 35 | 14 |
| UGT2B15 | NYLEDSLLK                 | 29.2 | 547.8 | 278.1  | 35 | 14 |
| UGT2B15 | NYLEDSLLK                 | 29.2 | 547.8 | 817.5  | 35 | 14 |
| UGT2B15 | NYLEDSLLK                 | 29.2 | 547.8 | 704.4  | 35 | 14 |
| UGT2B15 | NYLEDSLLK                 | 29.2 | 551.8 | 278.1  | 35 | 14 |
| UGT2B15 | NYLEDSLLK                 | 29.2 | 551.8 | 825.5  | 35 | 14 |
| UGT2B15 | SVINDPVYK                 | 20.2 | 517.8 | 848.5  | 35 | 13 |
| UGT2B15 | SVINDPVYK                 | 20.2 | 517.8 | 735.4  | 35 | 13 |
| UGT2B15 | SVINDPVYK                 | 20.2 | 517.8 | 424.7  | 35 | 13 |
| UGT2B15 | SVINDPVYK                 | 20.2 | 521.8 | 856.5  | 35 | 13 |
| UGT2B15 | SVINDPVYK                 | 20.2 | 521.8 | 428.7  | 35 | 13 |
| UGT2B17 | FSVGYTVEK                 | 19.5 | 515.3 | 235.1  | 35 | 17 |
| UGT2B17 | FSVGYTVEK                 | 19.5 | 515.3 | 882.5  | 35 | 17 |

|         |                          |      |        |        |    |    |
|---------|--------------------------|------|--------|--------|----|----|
| UGT2B17 | FSVGYTVEK                | 19.5 | 515.3  | 795.4  | 35 | 17 |
| UGT2B17 | FSVGYTVEK                | 19.5 | 515.3  | 696.4  | 35 | 17 |
| UGT2B17 | FSVGYTVEK                | 19.5 | 515.3  | 639.3  | 35 | 17 |
| UGT2B17 | FSVGYTVEK                | 19.5 | 519.3  | 235.1  | 35 | 17 |
| UGT2B17 | FSVGYTVEK                | 19.5 | 519.3  | 704.4  | 35 | 17 |
| UGT2B17 | LCEDAVLNK                | 18.0 | 531.3  | 788.4  | 35 | 22 |
| UGT2B17 | LCEDAVLNK                | 18.0 | 531.3  | 659.4  | 35 | 22 |
| UGT2B17 | LCEDAVLNK                | 18.0 | 531.3  | 374.2  | 35 | 22 |
| UGT2B17 | LCEDAVLNK                | 18.0 | 531.3  | 261.2  | 35 | 22 |
| UGT2B17 | LCEDAVLNK                | 18.0 | 535.3  | 382.3  | 35 | 22 |
| UGT2B17 | LCEDAVLNK                | 18.0 | 535.3  | 269.2  | 35 | 22 |
| UGT2B17 | SVINDPIYK                | 22.6 | 524.8  | 862.5  | 35 | 13 |
| UGT2B17 | SVINDPIYK                | 22.6 | 524.8  | 749.4  | 35 | 13 |
| UGT2B17 | SVINDPIYK                | 22.6 | 524.8  | 431.7  | 35 | 13 |
| UGT2B17 | SVINDPIYK                | 22.6 | 528.8  | 870.5  | 35 | 13 |
| UGT2B17 | SVINDPIYK                | 22.6 | 528.8  | 435.7  | 35 | 13 |
| UGT2B28 | GHEVTVLASSASILFDPNDAFTLK | 40.3 | 844.8  | 1167.6 | 35 | 22 |
| UGT2B28 | GHEVTVLASSASILFDPNDAFTLK | 40.3 | 844.8  | 1020.5 | 35 | 22 |
| UGT2B28 | GHEVTVLASSASILFDPNDAFTLK | 40.3 | 844.8  | 905.5  | 35 | 22 |
| UGT2B28 | GHEVTVLASSASILFDPNDAFTLK | 40.3 | 847.4  | 1175.6 | 35 | 22 |
| UGT2B28 | GHEVTVLASSASILFDPNDAFTLK | 40.3 | 847.4  | 913.5  | 35 | 22 |
| UGT2B28 | WIPQNDLLGLPK             | 33.8 | 697.4  | 300.2  | 35 | 18 |
| UGT2B28 | WIPQNDLLGLPK             | 33.8 | 697.4  | 1094.6 | 35 | 18 |
| UGT2B28 | WIPQNDLLGLPK             | 33.8 | 697.4  | 869.5  | 35 | 18 |
| UGT2B28 | WIPQNDLLGLPK             | 33.8 | 697.4  | 414.3  | 35 | 18 |
| UGT2B28 | WIPQNDLLGLPK             | 33.8 | 697.4  | 244.2  | 35 | 18 |
| UGT2B28 | WIPQNDLLGLPK             | 33.8 | 697.4  | 547.8  | 35 | 18 |
| UGT2B28 | WIPQNDLLGLPK             | 33.8 | 701.4  | 300.2  | 35 | 18 |
| UGT2B28 | WIPQNDLLGLPK             | 33.8 | 701.4  | 551.8  | 35 | 18 |
| UGT2B4  | ANVIASALAK               | 24.2 | 479.3  | 285.2  | 35 | 13 |
| UGT2B4  | ANVIASALAK               | 24.2 | 479.3  | 673.4  | 35 | 13 |
| UGT2B4  | ANVIASALAK               | 24.2 | 479.3  | 560.3  | 35 | 13 |
| UGT2B4  | ANVIASALAK               | 24.2 | 483.3  | 285.2  | 35 | 13 |
| UGT2B4  | ANVIASALAK               | 24.2 | 483.3  | 568.4  | 35 | 13 |
| UGT2B4  | FEVYPVSLTK               | 29.4 | 1182.6 | 644.4  | 35 | 19 |
| UGT2B4  | FEVYPVSLTK               | 29.4 | 591.8  | 906.5  | 35 | 19 |
| UGT2B4  | FEVYPVSLTK               | 29.4 | 591.8  | 807.5  | 35 | 19 |
| UGT2B4  | FEVYPVSLTK               | 29.4 | 595.8  | 914.5  | 35 | 19 |
| UGT2B4  | FEVYPVSLTK               | 29.4 | 595.8  | 815.5  | 35 | 19 |
| UGT2B4  | TILDELVQR                | 32.3 | 543.8  | 872.5  | 35 | 18 |
| UGT2B4  | TILDELVQR                | 32.3 | 543.8  | 759.4  | 35 | 18 |
| UGT2B4  | TILDELVQR                | 32.3 | 543.8  | 644.4  | 35 | 18 |
| UGT2B4  | TILDELVQR                | 32.3 | 548.8  | 882.5  | 35 | 18 |
| UGT2B4  | TILDELVQR                | 32.3 | 548.8  | 769.4  | 35 | 18 |
| UGT2B7  | ANVIASALAQIPQK           | 32.8 | 712.4  | 797.5  | 35 | 19 |
| UGT2B7  | ANVIASALAQIPQK           | 32.8 | 712.4  | 684.4  | 35 | 19 |
| UGT2B7  | ANVIASALAQIPQK           | 32.8 | 712.4  | 372.2  | 35 | 19 |
| UGT2B7  | ANVIASALAQIPQK           | 32.8 | 716.4  | 692.4  | 35 | 19 |
| UGT2B7  | ANVIASALAQIPQK           | 32.8 | 716.4  | 380.2  | 35 | 19 |
| UGT2B7  | IEIYPTSLTK               | 26.4 | 582.8  | 922.5  | 35 | 19 |

|        |            |      |       |       |    |    |
|--------|------------|------|-------|-------|----|----|
| UGT2B7 | IEIYPTSLTK | 26.4 | 582.8 | 809.4 | 35 | 19 |
| UGT2B7 | IEIYPTSLTK | 26.4 | 582.8 | 646.4 | 35 | 19 |
| UGT2B7 | IEIYPTSLTK | 26.4 | 586.8 | 817.5 | 35 | 19 |
| UGT2B7 | IEIYPTSLTK | 26.4 | 586.8 | 654.4 | 35 | 19 |
| UGT2B7 | TILDELIQR  | 29.0 | 550.8 | 886.5 | 35 | 17 |
| UGT2B7 | TILDELIQR  | 29.0 | 550.8 | 773.4 | 35 | 17 |
| UGT2B7 | TILDELIQR  | 29.0 | 550.8 | 658.4 | 35 | 17 |
| UGT2B7 | TILDELIQR  | 29.0 | 550.8 | 416.3 | 35 | 17 |
| UGT2B7 | TILDELIQR  | 29.0 | 555.8 | 896.5 | 35 | 17 |
| UGT2B7 | TILDELIQR  | 29.0 | 555.8 | 783.4 | 35 | 17 |
| UGT2B7 | TILDELIQR  | 29.0 | 555.8 | 668.4 | 35 | 17 |
| UGT2B7 | TILDELIQR  | 29.0 | 555.8 | 426.3 | 35 | 17 |

**R**, **K** and **C** correspond to heavy arginine (R[13C6, 15N4]), heavy lysine (K[13C6, 15N2]) and carbamidomethylated cysteine (+57 Da).

**Supplementary Table 2Sc: List of ADME gene products, surrogate peptides and LC-MRM parameters for AB Sciex 6500 triple quadrupole instrument**

| Protein | Peptide                   | RT   | Parent | Product | DP | CE |
|---------|---------------------------|------|--------|---------|----|----|
| ADH1A   | GAILGGFK                  | 12.4 | 381.7  | 521.3   | 59 | 20 |
| ADH1A   | GAILGGFK                  | 12.4 | 381.7  | 408.2   | 59 | 20 |
| ADH1A   | GAILGGFK                  | 12.4 | 762.5  | 408.2   | 87 | 20 |
| ADH1A   | GAILGGFK                  | 12.4 | 385.7  | 529.3   | 59 | 20 |
| ADH1A   | GAILGGFK                  | 12.4 | 385.7  | 416.2   | 59 | 20 |
| ADH1A   | KPIHHFLGISTFSQYTVVDENAVAK | 14.0 | 934.5  | 797.4   | 99 | 41 |
| ADH1A   | KPIHHFLGISTFSQYTVVDENAVAK | 14.0 | 934.5  | 1045.6  | 99 | 41 |
| ADH1A   | KPIHHFLGISTFSQYTVVDENAVAK | 14.0 | 934.5  | 845.4   | 99 | 41 |
| ADH1A   | KPIHHFLGISTFSQYTVVDENAVAK | 14.0 | 934.5  | 746.4   | 99 | 41 |
| ADH1A   | KPIHHFLGISTFSQYTVVDENAVAK | 14.0 | 937.2  | 797.4   | 99 | 41 |
| ADH1A   | KPIHHFLGISTFSQYTVVDENAVAK | 14.0 | 937.2  | 1053.6  | 99 | 41 |
| ADH1A   | KPIHHFLGISTFSQYTVVDENAVAK | 14.0 | 937.2  | 853.5   | 99 | 41 |
| ADH1A   | KPIHHFLGISTFSQYTVVDENAVAK | 14.0 | 937.2  | 754.4   | 99 | 41 |
| ADH1A   | NDVSNPQGTLQDGTSR          | 9.0  | 844.9  | 1159.6  | 93 | 39 |
| ADH1A   | NDVSNPQGTLQDGTSR          | 9.0  | 844.9  | 535.2   | 93 | 39 |
| ADH1A   | NDVSNPQGTLQDGTSR          | 9.0  | 844.9  | 420.2   | 93 | 39 |
| ADH1A   | NDVSNPQGTLQDGTSR          | 9.0  | 849.9  | 1169.6  | 93 | 39 |
| ADH1A   | NDVSNPQGTLQDGTSR          | 9.0  | 849.9  | 430.2   | 93 | 39 |
| ADH1B   | AAVLWEVK                  | 13.7 | 458.3  | 242.2   | 65 | 18 |
| ADH1B   | AAVLWEVK                  | 13.7 | 458.3  | 674.4   | 65 | 18 |
| ADH1B   | AAVLWEVK                  | 13.7 | 458.3  | 561.3   | 65 | 18 |
| ADH1B   | AAVLWEVK                  | 13.7 | 462.3  | 242.2   | 65 | 18 |
| ADH1B   | AAVLWEVK                  | 13.7 | 462.3  | 569.3   | 65 | 18 |
| ADH1C   | GAIFGGFK                  | 13.5 | 398.7  | 668.4   | 60 | 20 |
| ADH1C   | GAIFGGFK                  | 13.5 | 398.7  | 555.3   | 60 | 20 |
| ADH1C   | GAIFGGFK                  | 13.5 | 398.7  | 408.2   | 60 | 20 |
| ADH1C   | GAIFGGFK                  | 13.5 | 402.7  | 563.3   | 60 | 20 |
| ADH1C   | GAIFGGFK                  | 13.5 | 402.7  | 416.2   | 60 | 20 |
| ADH1C   | INEGFDLLR                 | 14.8 | 538.8  | 228.1   | 70 | 21 |
| ADH1C   | INEGFDLLR                 | 14.8 | 538.8  | 849.4   | 70 | 21 |
| ADH1C   | INEGFDLLR                 | 14.8 | 538.8  | 720.4   | 70 | 21 |
| ADH1C   | INEGFDLLR                 | 14.8 | 543.8  | 228.1   | 70 | 21 |
| ADH1C   | INEGFDLLR                 | 14.8 | 543.8  | 859.5   | 70 | 21 |
| ADH1C   | INEGFDLLR                 | 14.8 | 543.8  | 730.4   | 70 | 21 |
| ADH1C   | VCLIGCGFSTGYGSAVK         | 14.5 | 888.4  | 1290.6  | 96 | 39 |
| ADH1C   | VCLIGCGFSTGYGSAVK         | 14.5 | 888.4  | 869.4   | 96 | 39 |
| ADH1C   | VCLIGCGFSTGYGSAVK         | 14.5 | 888.4  | 758.9   | 96 | 39 |
| ADH1C   | VCLIGCGFSTGYGSAVK         | 14.5 | 892.4  | 1298.6  | 96 | 39 |
| ADH1C   | VCLIGCGFSTGYGSAVK         | 14.5 | 892.4  | 877.5   | 96 | 39 |
| ALDH1A1 | ANNTFYGLSAGVFTK           | 15.9 | 795.4  | 1042.6  | 89 | 37 |
| ALDH1A1 | ANNTFYGLSAGVFTK           | 15.9 | 795.4  | 879.5   | 89 | 37 |
| ALDH1A1 | ANNTFYGLSAGVFTK           | 15.9 | 795.4  | 395.2   | 89 | 37 |
| ALDH1A1 | ANNTFYGLSAGVFTK           | 15.9 | 799.4  | 887.5   | 89 | 37 |
| ALDH1A1 | ANNTFYGLSAGVFTK           | 15.9 | 799.4  | 403.2   | 89 | 37 |
| ALDH1A1 | IFINNEWHDSVSGK            | 12.4 | 549.3  | 291.2   | 71 | 23 |
| ALDH1A1 | IFINNEWHDSVSGK            | 12.4 | 549.3  | 693.3   | 71 | 23 |
| ALDH1A1 | IFINNEWHDSVSGK            | 12.4 | 549.3  | 636.8   | 71 | 23 |



|         |                  |      |       |        |    |    |
|---------|------------------|------|-------|--------|----|----|
| ALDH1A1 | IFINNEWHDSVSGK   | 12.4 | 551.9 | 697.3  | 71 | 23 |
| ALDH1A1 | IFINNEWHDSVSGK   | 12.4 | 551.9 | 640.8  | 71 | 23 |
| ALDH1A1 | IFVEESIYDEFVR    | 17.9 | 823.4 | 261.2  | 91 | 38 |
| ALDH1A1 | IFVEESIYDEFVR    | 17.9 | 823.4 | 360.2  | 91 | 38 |
| ALDH1A1 | IFVEESIYDEFVR    | 17.9 | 823.4 | 665.3  | 91 | 38 |
| ALDH1A1 | IFVEESIYDEFVR    | 17.9 | 828.4 | 261.2  | 91 | 38 |
| ALDH1A1 | IFVEESIYDEFVR    | 17.9 | 828.4 | 360.2  | 91 | 38 |
| ALDH1A3 | EQICEVEEGDKPDVDK | 11.0 | 630.6 | 566.3  | 77 | 32 |
| ALDH1A3 | EQICEVEEGDKPDVDK | 11.0 | 630.6 | 680.3  | 77 | 32 |
| ALDH1A3 | EQICEVEEGDKPDVDK | 11.0 | 630.6 | 760.3  | 77 | 32 |
| ALDH1A3 | EQICEVEEGDKPDVDK | 11.0 | 630.6 | 501.7  | 77 | 32 |
| ALDH1A3 | EQICEVEEGDKPDVDK | 11.0 | 633.3 | 570.3  | 77 | 32 |
| ALDH1A3 | EQICEVEEGDKPDVDK | 11.0 | 633.3 | 684.3  | 77 | 32 |
| ALDH1A3 | EQICEVEEGDKPDVDK | 11.0 | 633.3 | 764.3  | 77 | 32 |
| ALDH1A3 | EQICEVEEGDKPDVDK | 11.0 | 633.3 | 505.7  | 77 | 32 |
| ALDH1A3 | LLHQLADLVER      | 16.0 | 436.3 | 304.2  | 63 | 21 |
| ALDH1A3 | LLHQLADLVER      | 16.0 | 436.3 | 403.2  | 63 | 21 |
| ALDH1A3 | LLHQLADLVER      | 16.0 | 436.3 | 631.3  | 63 | 21 |
| ALDH1A3 | LLHQLADLVER      | 16.0 | 436.3 | 304.2  | 63 | 21 |
| ALDH1A3 | LLHQLADLVER      | 16.0 | 436.3 | 403.2  | 63 | 21 |
| ALDH1A3 | LLHQLADLVER      | 16.0 | 436.3 | 631.3  | 63 | 21 |
| ALDH1A3 | LLHQLADLVER      | 16.0 | 439.6 | 314.2  | 63 | 21 |
| ALDH1A3 | LLHQLADLVER      | 16.0 | 439.6 | 413.2  | 63 | 21 |
| ALDH1A3 | LLHQLADLVER      | 16.0 | 439.6 | 314.2  | 63 | 21 |
| ALDH1A3 | LLHQLADLVER      | 16.0 | 439.6 | 413.2  | 63 | 21 |
| AOX1    | GLHGPLTLNSPLTPEK | 13.6 | 837.5 | 1301.7 | 92 | 42 |
| AOX1    | GLHGPLTLNSPLTPEK | 13.6 | 837.5 | 1366.8 | 92 | 42 |
| AOX1    | GLHGPLTLNSPLTPEK | 13.6 | 837.5 | 1309.7 | 92 | 42 |
| AOX1    | GLHGPLTLNSPLTPEK | 13.6 | 837.5 | 373.2  | 92 | 42 |
| AOX1    | GLHGPLTLNSPLTPEK | 13.6 | 841.5 | 1301.7 | 92 | 42 |
| AOX1    | GLHGPLTLNSPLTPEK | 13.6 | 841.5 | 1374.8 | 92 | 42 |
| AOX1    | GLHGPLTLNSPLTPEK | 13.6 | 841.5 | 1317.8 | 92 | 42 |
| AOX1    | GLHGPLTLNSPLTPEK | 13.6 | 841.5 | 381.2  | 92 | 42 |
| AOX1    | LILNEVSLLGSAPGGK | 16.4 | 784.5 | 886.5  | 88 | 42 |
| AOX1    | LILNEVSLLGSAPGGK | 16.4 | 784.5 | 573.3  | 88 | 42 |
| AOX1    | LILNEVSLLGSAPGGK | 16.4 | 784.5 | 358.2  | 88 | 42 |
| AOX1    | LILNEVSLLGSAPGGK | 16.4 | 788.5 | 581.3  | 88 | 42 |
| AOX1    | LILNEVSLLGSAPGGK | 16.4 | 788.5 | 366.2  | 88 | 42 |
| CES1    | AGQLLSELFTR      | 16.8 | 674.9 | 257.1  | 80 | 33 |
| CES1    | AGQLLSELFTR      | 16.8 | 674.9 | 370.2  | 80 | 33 |
| CES1    | AGQLLSELFTR      | 16.8 | 674.9 | 866.4  | 80 | 33 |
| CES1    | AGQLLSELFTR      | 16.8 | 679.9 | 257.1  | 80 | 33 |
| CES1    | AGQLLSELFTR      | 16.8 | 679.9 | 370.2  | 80 | 33 |
| CES1    | AISESGVALTSVLVK  | 15.3 | 737.4 | 830.5  | 85 | 28 |
| CES1    | AISESGVALTSVLVK  | 15.3 | 737.4 | 759.5  | 85 | 28 |
| CES1    | AISESGVALTSVLVK  | 15.3 | 737.4 | 646.4  | 85 | 28 |
| CES1    | AISESGVALTSVLVK  | 15.3 | 741.4 | 838.5  | 85 | 28 |
| CES1    | AISESGVALTSVLVK  | 15.3 | 741.4 | 767.5  | 85 | 28 |
| CES1    | EGYLQIGANTQAAQK  | 11.4 | 796.4 | 350.1  | 89 | 31 |
| CES1    | EGYLQIGANTQAAQK  | 11.4 | 796.4 | 888.5  | 89 | 31 |

|         |                                   |      |        |        |     |    |
|---------|-----------------------------------|------|--------|--------|-----|----|
| CES1    | EGYLQIGANTQAAQK                   | 11.4 | 796.4  | 417.2  | 89  | 31 |
| CES1    | EGYLQIGANTQAAQ <u>K</u>           | 11.4 | 800.4  | 350.1  | 89  | 31 |
| CES1    | EGYLQIGANTQAAQ <u>K</u>           | 11.4 | 800.4  | 896.5  | 89  | 31 |
| CES2    | ADHGDELPFVFR                      | 15.0 | 701.8  | 1079.6 | 82  | 39 |
| CES2    | ADHGDELPFVFR                      | 15.0 | 701.8  | 665.4  | 82  | 39 |
| CES2    | ADHGDELPFVFR                      | 15.0 | 701.8  | 322.2  | 82  | 39 |
| CES2    | ADHGDELPFVFR                      | 15.0 | 706.8  | 675.4  | 82  | 39 |
| CES2    | ADHGDELPFVFR                      | 15.0 | 706.8  | 332.2  | 82  | 39 |
| CES2    | TTHTGQVLGSLVHVK                   | 11.5 | 788.9  | 739.4  | 89  | 37 |
| CES2    | TTHTGQVLGSLVHVK                   | 11.5 | 788.9  | 383.2  | 89  | 37 |
| CES2    | TTHTGQVLGSLVHVK                   | 11.5 | 788.9  | 687.9  | 89  | 37 |
| CES2    | TTHTGQVLGSLVHV <u>K</u>           | 11.5 | 793.0  | 391.3  | 89  | 37 |
| CES2    | TTHTGQVLGSLVHV <u>K</u>           | 11.5 | 793.0  | 691.9  | 89  | 37 |
| CP2C8   | GLGISSNGK                         | 10.7 | 473.3  | 492.2  | 80  | 22 |
| CP2C8   | GLGISSNGK                         | 10.7 | 473.3  | 605.3  | 80  | 22 |
| CP2C8   | GLGISSNGK                         | 10.7 | 473.3  | 628.4  | 80  | 22 |
| CP2C8   | GLGISSNGK                         | 10.7 | 473.3  | 775.4  | 80  | 22 |
| CP2C8   | GLGISSNG <u>K</u>                 | 10.7 | 477.3  | 500.3  | 80  | 22 |
| CP2C8   | GLGISSNG <u>K</u>                 | 10.7 | 477.3  | 613.3  | 80  | 22 |
| CYP19A1 | GIIFNNNP <del>EL</del> WK         | 10.0 | 722.9  | 333.2  | 80  | 30 |
| CYP19A1 | GIIFNNNP <del>EL</del> WK         | 10.0 | 722.9  | 672.4  | 80  | 30 |
| CYP19A1 | GIIFNNNP <del>EL</del> WK         | 10.0 | 722.9  | 1014.5 | 80  | 30 |
| CYP19A1 | GIIFNNNP <del>EL</del> <u>W</u> K | 10.0 | 726.9  | 680.4  | 80  | 30 |
| CYP19A1 | GIIFNNNP <del>EL</del> <u>W</u> K | 10.0 | 726.9  | 1169.6 | 80  | 30 |
| CYP1A1  | FLTPDG <del>AID</del> K           | 11.7 | 538.8  | 261.2  | 80  | 22 |
| CYP1A1  | FLTPDG <del>AID</del> K           | 11.7 | 538.8  | 715.4  | 80  | 22 |
| CYP1A1  | FLTPDG <del>AID</del> K           | 11.7 | 538.8  | 816.4  | 80  | 22 |
| CYP1A1  | FLTPDG <del>AID</del> <u>K</u>    | 11.7 | 542.8  | 261.2  | 80  | 22 |
| CYP1A1  | FLTPDG <del>AID</del> <u>K</u>    | 11.7 | 542.8  | 723.4  | 80  | 22 |
| CYP1A2  | IGSTPVLVLSR                       | 13.5 | 571.4  | 783.5  | 73  | 29 |
| CYP1A2  | IGSTPVLVLSR                       | 13.5 | 571.4  | 375.2  | 73  | 29 |
| CYP1A2  | IGSTPVLVLSR                       | 13.5 | 571.4  | 392.3  | 73  | 29 |
| CYP1A2  | IGSTPVLVLS <u>R</u>               | 13.5 | 576.4  | 793.5  | 73  | 29 |
| CYP1A2  | IGSTPVLVLS <u>R</u>               | 13.5 | 576.4  | 397.3  | 73  | 29 |
| CYP1A2  | NTHEFVETASSGNPLDFFPILR            | 19.2 | 831.1  | 1117.6 | 80  | 30 |
| CYP1A2  | NTHEFVETASSGNPLDFFPILR            | 19.2 | 831.1  | 645.4  | 80  | 30 |
| CYP1A2  | NTHEFVETASSGNPLDFFPILR            | 19.2 | 831.1  | 498.3  | 80  | 30 |
| CYP1A2  | NTHEFVETASSGNPLDFFPIL <u>R</u>    | 19.2 | 834.4  | 655.4  | 80  | 30 |
| CYP1A2  | NTHEFVETASSGNPLDFFPIL <u>R</u>    | 19.2 | 834.4  | 508.3  | 80  | 30 |
| CYP1A2  | YLPNPALQ <u>R</u>                 | 10.8 | 541.3  | 594.4  | 80  | 24 |
| CYP1A2  | YLPNPALQ <u>R</u>                 | 10.8 | 541.3  | 805.5  | 80  | 24 |
| CYP1A2  | YLPNPALQR                         | 10.8 | 536.3  | 277.2  | 80  | 19 |
| CYP1A2  | YLPNPALQR                         | 10.8 | 536.3  | 303.2  | 80  | 19 |
| CYP1A2  | YLPNPALQR                         | 10.8 | 536.3  | 584.4  | 80  | 19 |
| CYP1A2  | YLPNPALQR                         | 10.8 | 536.3  | 795.5  | 80  | 19 |
| CYP2A6  | DPSFFSNPQDFNPQHFLNEK              | 14.5 | 1204.6 | 1012.5 | 119 | 45 |
| CYP2A6  | DPSFFSNPQDFNPQHFLNEK              | 14.5 | 1204.6 | 787.4  | 119 | 45 |
| CYP2A6  | DPSFFSNPQDFNPQHFLNEK              | 14.5 | 1204.6 | 650.4  | 119 | 45 |
| CYP2A6  | DPSFFSNPQDFNPQHFLNEK              | 14.5 | 1204.6 | 1147.0 | 119 | 45 |
| CYP2A6  | DPSFFSNPQDFNPQHFLNE <u>K</u>      | 14.5 | 1208.6 | 1020.5 | 119 | 45 |

|         |                                                   |      |        |        |     |    |
|---------|---------------------------------------------------|------|--------|--------|-----|----|
| CYP2A6  | DPSFFSNPQDFNPQHFLNE <u>K</u>                      | 14.5 | 1208.6 | 795.4  | 119 | 45 |
| CYP2A6  | DPSFFSNPQDFNPQHFLNE <u>K</u>                      | 14.5 | 1208.6 | 658.4  | 119 | 45 |
| CYP2A6  | DPSFFSNPQDFNPQHFLNE <u>K</u>                      | 14.5 | 1208.6 | 1151.0 | 119 | 45 |
| CYP2A6  | GTGGANIDPTFFLS                                    | 16.2 | 776.9  | 982.5  | 88  | 30 |
| CYP2A6  | GTGGANIDPTFFLS                                    | 16.2 | 776.9  | 867.5  | 88  | 30 |
| CYP2A6  | GTGGANIDPTFFLS                                    | 16.2 | 776.9  | 522.3  | 88  | 30 |
| CYP2A6  | GTGGANIDPTFFLS <u>K</u>                           | 16.2 | 781.9  | 992.5  | 88  | 30 |
| CYP2A6  | GTGGANIDPTFFLS <u>K</u>                           | 16.2 | 781.9  | 877.5  | 88  | 30 |
| CYP2A6  | GTGGANIDPTFFLSR                                   | 16.1 | 776.9  | 982.5  | 75  | 32 |
| CYP2A6  | GTGGANIDPTFFLSR                                   | 16.1 | 776.9  | 867.5  | 75  | 32 |
| CYP2A6  | GTGGANIDPTFFLSR                                   | 16.1 | 776.9  | 522.3  | 75  | 32 |
| CYP2A6  | GTGGANIDPTFFLS <u>R</u>                           | 16.1 | 781.9  | 992.5  | 75  | 32 |
| CYP2A6  | GTGGANIDPTFFLS <u>R</u>                           | 16.1 | 781.9  | 877.5  | 75  | 32 |
| CYP2B6  | TEAFIPFSLGK                                       | 16.6 | 605.3  | 648.4  | 80  | 22 |
| CYP2B6  | TEAFIPFSLGK                                       | 16.6 | 605.3  | 908.5  | 80  | 22 |
| CYP2B6  | TEAFIPFSLGK                                       | 16.6 | 605.3  | 979.6  | 80  | 22 |
| CYP2B6  | TEAFIPFSLG <u>K</u>                               | 16.6 | 609.3  | 656.4  | 80  | 22 |
| CYP2B6  | TEAFIPFSLG <u>K</u>                               | 16.6 | 609.3  | 987.6  | 80  | 22 |
| CYP2B6  | GI <u>A</u> CHYLEEGAQ <u>C</u> PAPLSYVPR          | 14.8 | 830.1  | 665.3  | 80  | 30 |
| CYP2B6  | GI <u>A</u> CHYLEEGAQ <u>C</u> PAPLSYVPR          | 14.8 | 830.1  | 999.6  | 80  | 30 |
| CYP2B6  | GI <u>A</u> CHYLEEGAQ <u>C</u> PAPLSYVPR          | 14.8 | 830.1  | 831.5  | 80  | 30 |
| CYP2B6  | GI <u>A</u> CHYLEEGAQ <u>C</u> PAPLSYVPR          | 14.8 | 830.1  | 601.3  | 80  | 30 |
| CYP2B6  | GI <u>A</u> CHYLEEGAQ <u>C</u> PAPLSYVPR <u>R</u> | 14.8 | 833.4  | 1009.6 | 80  | 30 |
| CYP2B6  | GI <u>A</u> CHYLEEGAQ <u>C</u> PAPLSYVPR <u>R</u> | 14.8 | 833.4  | 841.5  | 80  | 30 |
| CYP2C18 | DIDITPIANAFGR                                     | 16.6 | 701.9  | 1174.6 | 82  | 34 |
| CYP2C18 | DIDITPIANAFGR                                     | 16.6 | 701.9  | 946.5  | 82  | 34 |
| CYP2C18 | DIDITPIANAFGR                                     | 16.6 | 701.9  | 845.5  | 82  | 34 |
| CYP2C18 | DIDITPIANAFGR                                     | 16.6 | 701.9  | 635.3  | 82  | 34 |
| CYP2C18 | DIDITPIANAFGR <u>R</u>                            | 16.6 | 706.9  | 1184.6 | 82  | 34 |
| CYP2C18 | DIDITPIANAFGR <u>R</u>                            | 16.6 | 706.9  | 956.5  | 82  | 34 |
| CYP2C18 | DIDITPIANAFGR <u>R</u>                            | 16.6 | 706.9  | 855.5  | 82  | 34 |
| CYP2C18 | DIDITPIANAFGR <u>R</u>                            | 16.6 | 706.9  | 645.3  | 82  | 34 |
| CYP2C19 | GTTILTSLSVLDHNK                                   | 17.0 | 567.3  | 513.2  | 73  | 22 |
| CYP2C19 | GTTILTSLSVLDHNK                                   | 17.0 | 567.3  | 664.4  | 73  | 22 |
| CYP2C19 | GTTILTSLSVLDHNK                                   | 17.0 | 567.3  | 607.8  | 73  | 22 |
| CYP2C19 | GTTILTSLSVLDHN <u>K</u>                           | 17.0 | 570.0  | 521.3  | 73  | 22 |
| CYP2C19 | GTTILTSLSVLDHN <u>K</u>                           | 17.0 | 570.0  | 668.4  | 73  | 22 |
| CYP2C19 | HFLDEGGNFK                                        | 11.0 | 388.5  | 522.3  | 59  | 12 |
| CYP2C19 | HFLDEGGNFK                                        | 11.0 | 388.5  | 465.2  | 59  | 12 |
| CYP2C19 | HFLDEGGNFK                                        | 11.0 | 388.5  | 261.6  | 59  | 12 |
| CYP2C19 | HFLDEGGNFK <u>K</u>                               | 11.0 | 391.2  | 530.3  | 59  | 12 |
| CYP2C19 | HFLDEGGNFK <u>K</u>                               | 11.0 | 391.2  | 265.6  | 59  | 12 |
| CYP2C8  | YSDLVPTGVPHAVTTDTK                                | 12.2 | 634.3  | 578.3  | 77  | 27 |
| CYP2C8  | YSDLVPTGVPHAVTTDTK                                | 12.2 | 634.3  | 711.9  | 77  | 27 |
| CYP2C8  | YSDLVPTGVPHAVTTDTK                                | 12.2 | 634.3  | 662.3  | 77  | 27 |
| CYP2C8  | YSDLVPTGVPHAVTTDT <u>K</u>                        | 12.2 | 637.0  | 578.3  | 77  | 27 |
| CYP2C8  | YSDLVPTGVPHAVTTDT <u>K</u>                        | 12.2 | 637.0  | 666.4  | 77  | 27 |
| CYP2C9  | GIFPLAER                                          | 14.3 | 451.8  | 585.3  | 64  | 17 |
| CYP2C9  | GIFPLAER                                          | 14.3 | 451.8  | 366.7  | 64  | 17 |
| CYP2C9  | GIFPLAER                                          | 14.3 | 451.8  | 293.2  | 64  | 17 |

|        |                       |      |        |        |     |    |
|--------|-----------------------|------|--------|--------|-----|----|
| CYP2C9 | GIFPLA <u>R</u>       | 14.3 | 456.8  | 595.3  | 64  | 17 |
| CYP2C9 | GIFPLA <u>R</u>       | 14.3 | 456.8  | 371.7  | 64  | 17 |
| CYP2C9 | LPPGPTPLPVIGNILQIGIK  | 21.0 | 1019.1 | 773.5  | 105 | 46 |
| CYP2C9 | LPPGPTPLPVIGNILQIGIK  | 21.0 | 1019.1 | 1068.7 | 105 | 46 |
| CYP2C9 | LPPGPTPLPVIGNILQIGIK  | 21.0 | 1019.1 | 962.6  | 105 | 46 |
| CYP2C9 | LPPGPTPLPVIGNILQIGIK  | 21.0 | 1019.1 | 914.1  | 105 | 46 |
| CYP2C9 | LPPGPTPLPVIGNILQIGIK  | 21.0 | 1023.1 | 1076.7 | 105 | 46 |
| CYP2C9 | LPPGPTPLPVIGNILQIGIK  | 21.0 | 1023.1 | 918.1  | 105 | 46 |
| CYP2C9 | LPPGPTPLPVIGNILQIGIK  | 21.0 | 1023.1 | 773.5  | 105 | 46 |
| CYP2C9 | LPPGPTPLPVIGNILQIGIK  | 21.0 | 1023.1 | 966.6  | 105 | 46 |
| CYP2D6 | AVSNVIASLT <u>CGR</u> | 15.0 | 674.4  | 471.3  | 80  | 26 |
| CYP2D6 | AVSNVIASLT <u>CGR</u> | 15.0 | 674.4  | 877.5  | 80  | 26 |
| CYP2D6 | AVSNVIASLT <u>CGR</u> | 15.0 | 674.4  | 764.4  | 80  | 26 |
| CYP2D6 | AVSNVIASLT <u>CGR</u> | 15.0 | 674.4  | 693.3  | 80  | 26 |
| CYP2D6 | AVSNVIASLT <u>CGR</u> | 15.0 | 679.4  | 471.3  | 80  | 26 |
| CYP2D6 | AVSNVIASLT <u>CGR</u> | 15.0 | 679.4  | 887.5  | 80  | 26 |
| CYP2D6 | AVSNVIASLT <u>CGR</u> | 15.0 | 679.4  | 774.4  | 80  | 26 |
| CYP2D6 | AVSNVIASLT <u>CGR</u> | 15.0 | 679.4  | 703.3  | 80  | 26 |
| CYP2D6 | VQQEIDDVIGQVR         | 13.3 | 749.9  | 1271.7 | 86  | 30 |
| CYP2D6 | VQQEIDDVIGQVR         | 13.3 | 749.9  | 572.4  | 86  | 30 |
| CYP2D6 | VQQEIDDVIGQVR         | 13.3 | 749.9  | 459.3  | 86  | 30 |
| CYP2D6 | VQQEIDDVIGQVR         | 13.3 | 754.9  | 582.4  | 86  | 30 |
| CYP2D6 | VQQEIDDVIGQVR         | 13.3 | 754.9  | 469.3  | 86  | 30 |
| CYP2E1 | FGPVFTLYVGSQR         | 17.0 | 735.9  | 709.4  | 85  | 35 |
| CYP2E1 | FGPVFTLYVGSQR         | 17.0 | 735.9  | 447.2  | 85  | 35 |
| CYP2E1 | FGPVFTLYVGSQR         | 17.0 | 735.9  | 633.8  | 85  | 35 |
| CYP2E1 | FGPVFTLYVGSQR         | 17.0 | 740.9  | 457.2  | 85  | 35 |
| CYP2E1 | FGPVFTLYVGSQR         | 17.0 | 740.9  | 638.8  | 85  | 35 |
| CYP2E1 | FITLVPSNLPHEATR       | 14.1 | 848.0  | 574.4  | 94  | 40 |
| CYP2E1 | FITLVPSNLPHEATR       | 14.1 | 848.0  | 1121.6 | 94  | 40 |
| CYP2E1 | FITLVPSNLPHEATR       | 14.1 | 848.0  | 561.3  | 94  | 40 |
| CYP2E1 | FITLVPSNLPHEATR       | 14.1 | 853.0  | 1131.6 | 94  | 40 |
| CYP2E1 | FITLVPSNLPHEATR       | 14.1 | 853.0  | 566.3  | 94  | 40 |
| CYP2J2 | LLDEVTYLEASK          | 14.2 | 690.9  | 1154.6 | 82  | 34 |
| CYP2J2 | LLDEVTYLEASK          | 14.2 | 690.9  | 910.5  | 82  | 34 |
| CYP2J2 | LLDEVTYLEASK          | 14.2 | 690.9  | 811.4  | 82  | 34 |
| CYP2J2 | LLDEVTYLEASK          | 14.2 | 690.9  | 710.4  | 82  | 34 |
| CYP2J2 | LLDEVTYLEASK          | 14.2 | 690.9  | 434.2  | 82  | 34 |
| CYP2J2 | LLDEVTYLEASK          | 14.2 | 694.9  | 1162.6 | 82  | 34 |
| CYP2J2 | LLDEVTYLEASK          | 14.2 | 694.9  | 819.4  | 82  | 34 |
| CYP2J2 | VIGQGQQPSTAAR         | 8.0  | 656.9  | 915.5  | 79  | 33 |
| CYP2J2 | VIGQGQQPSTAAR         | 8.0  | 656.9  | 602.3  | 79  | 33 |
| CYP2J2 | VIGQGQQPSTAAR         | 8.0  | 656.9  | 550.8  | 79  | 33 |
| CYP2J2 | VIGQGQQPSTAAR         | 8.0  | 661.9  | 612.3  | 79  | 33 |
| CYP2J2 | VIGQGQQPSTAAR         | 8.0  | 661.9  | 612.3  | 79  | 33 |
| CYP3A4 | EVTNFLR               | 12.0 | 439.7  | 229.1  | 63  | 25 |
| CYP3A4 | EVTNFLR               | 12.0 | 439.7  | 330.2  | 63  | 25 |
| CYP3A4 | EVTNFLR               | 12.0 | 439.7  | 650.4  | 63  | 25 |
| CYP3A4 | EVTNFL <u>R</u>       | 12.0 | 444.7  | 229.1  | 63  | 25 |
| CYP3A4 | EVTNFL <u>R</u>       | 12.0 | 444.7  | 660.4  | 63  | 25 |

|         |                      |      |       |        |     |    |
|---------|----------------------|------|-------|--------|-----|----|
| CYP3A4  | LGIPGPTPLPFLGNILSYHK | 20.4 | 712.1 | 284.2  | 83  | 34 |
| CYP3A4  | LGIPGPTPLPFLGNILSYHK | 20.4 | 712.1 | 846.5  | 83  | 34 |
| CYP3A4  | LGIPGPTPLPFLGNILSYHK | 20.4 | 712.1 | 1044.6 | 83  | 34 |
| CYP3A4  | LGIPGPTPLPFLGNILSYHK | 20.4 | 712.1 | 931.5  | 83  | 34 |
| CYP3A4  | LGIPGPTPLPFLGNILSYHK | 20.4 | 714.7 | 284.2  | 83  | 34 |
| CYP3A4  | LGIPGPTPLPFLGNILSYHK | 20.4 | 714.7 | 846.5  | 83  | 34 |
| CYP3A4  | LGIPGPTPLPFLGNILSYHK | 20.4 | 714.7 | 1052.6 | 83  | 34 |
| CYP3A4  | LGIPGPTPLPFLGNILSYHK | 20.4 | 714.7 | 939.5  | 83  | 34 |
| CYP3A43 | TLLSPAFTSVK          | 19.0 | 582.3 | 215.1  | 74  | 30 |
| CYP3A43 | TLLSPAFTSVK          | 19.0 | 582.3 | 328.2  | 74  | 30 |
| CYP3A43 | TLLSPAFTSVK          | 19.0 | 582.3 | 949.5  | 74  | 30 |
| CYP3A43 | TLLSPAFTSVK          | 19.0 | 582.3 | 836.5  | 74  | 30 |
| CYP3A43 | TLLSPAFTSVK          | 19.0 | 582.3 | 749.4  | 73  | 30 |
| CYP3A5  | DSIDPYIYTPFGTGPR     | 15.3 | 899.9 | 1368.7 | 97  | 34 |
| CYP3A5  | DSIDPYIYTPFGTGPR     | 15.3 | 899.9 | 995.5  | 97  | 34 |
| CYP3A5  | DSIDPYIYTPFGTGPR     | 15.3 | 899.9 | 832.4  | 97  | 34 |
| CYP3A5  | DSIDPYIYTPFGTGPR     | 15.3 | 899.9 | 731.4  | 97  | 34 |
| CYP3A5  | DSIDPYIYTPFGTGPR     | 15.3 | 904.9 | 1378.7 | 97  | 34 |
| CYP3A5  | DSIDPYIYTPFGTGPR     | 15.3 | 904.9 | 1005.5 | 97  | 34 |
| CYP3A5  | DSIDPYIYTPFGTGPR     | 15.3 | 904.9 | 842.4  | 97  | 34 |
| CYP3A5  | DSIDPYIYTPFGTGPR     | 15.3 | 904.9 | 741.4  | 97  | 34 |
| CYP3A5  | DTINFLSK             | 13.1 | 469.3 | 217.1  | 80  | 17 |
| CYP3A5  | DTINFLSK             | 13.1 | 469.3 | 234.2  | 80  | 17 |
| CYP3A5  | DTINFLSK             | 13.1 | 469.3 | 347.2  | 80  | 17 |
| CYP3A5  | DTINFLSK             | 13.1 | 473.3 | 616.4  | 80  | 17 |
| CYP3A5  | DTINFLSK             | 13.1 | 473.3 | 729.4  | 80  | 17 |
| CYP3A5  | DVEINGVFIPK          | 14.8 | 615.8 | 1016.6 | 76  | 24 |
| CYP3A5  | DVEINGVFIPK          | 14.8 | 615.8 | 887.5  | 76  | 24 |
| CYP3A5  | DVEINGVFIPK          | 14.8 | 615.8 | 774.5  | 76  | 24 |
| CYP3A5  | DVEINGVFIPK          | 14.8 | 615.8 | 504.3  | 76  | 24 |
| CYP3A5  | DVEINGVFIPK          | 14.8 | 615.8 | 244.2  | 76  | 24 |
| CYP3A5  | DVEINGVFIPK          | 14.8 | 619.8 | 782.5  | 76  | 24 |
| CYP3A5  | DVEINGVFIPK          | 14.8 | 619.8 | 252.2  | 76  | 24 |
| CYP3A5  | LDTQGLLQPEKPIVLK     | 16.5 | 896.5 | 741.4  | 97  | 34 |
| CYP3A5  | LDTQGLLQPEKPIVLK     | 16.5 | 896.5 | 869.5  | 97  | 34 |
| CYP3A5  | LDTQGLLQPEKPIVLK     | 16.5 | 896.5 | 1334.8 | 97  | 34 |
| CYP3A5  | LDTQGLLQPEKPIVLK     | 16.5 | 896.5 | 923.6  | 97  | 34 |
| CYP3A5  | LDTQGLLQPEKPIVLK     | 16.5 | 896.5 | 569.4  | 97  | 34 |
| CYP3A5  | LDTQGLLQPEKPIVLK     | 15.7 | 900.5 | 931.6  | 97  | 34 |
| CYP3A5  | LDTQGLLQPEKPIVLK     | 15.7 | 900.5 | 577.4  | 97  | 34 |
| CYP3A7  | FNPLDPFVLSIK         | 19.4 | 695.4 | 262.1  | 82  | 30 |
| CYP3A7  | FNPLDPFVLSIK         | 19.4 | 695.4 | 803.5  | 82  | 30 |
| CYP3A7  | FNPLDPFVLSIK         | 19.4 | 695.4 | 347.2  | 82  | 30 |
| CYP3A7  | FNPLDPFVLSIK         | 19.4 | 699.4 | 262.1  | 82  | 30 |
| CYP3A7  | FNPLDPFVLSIK         | 19.4 | 699.4 | 568.8  | 82  | 30 |
| CYP3A7  | LGIPGPTPLPFLGNALSFR  | 20.6 | 984.1 | 1331.7 | 103 | 44 |
| CYP3A7  | LGIPGPTPLPFLGNALSFR  | 20.6 | 984.1 | 1121.6 | 103 | 44 |
| CYP3A7  | LGIPGPTPLPFLGNALSFR  | 20.6 | 984.1 | 764.4  | 103 | 44 |
| CYP3A7  | LGIPGPTPLPFLGNALSFR  | 20.6 | 984.1 | 409.2  | 103 | 44 |
| CYP3A7  | LGIPGPTPLPFLGNALSFR  | 20.6 | 989.1 | 1131.6 | 103 | 44 |

|        |                      |      |        |        |     |    |
|--------|----------------------|------|--------|--------|-----|----|
| CYP3A7 | LGIPGPTPLPFLGNALSFR  | 20.6 | 989.1  | 419.2  | 103 | 44 |
| DPYD   | ADVVISAFGSVLSDPK     | 16.8 | 802.9  | 1220.7 | 90  | 38 |
| DPYD   | ADVVISAFGSVLSDPK     | 16.8 | 802.9  | 1107.6 | 90  | 38 |
| DPYD   | ADVVISAFGSVLSDPK     | 16.8 | 802.9  | 1020.5 | 90  | 38 |
| DPYD   | ADVVISAFGSVLSDPK     | 16.8 | 802.9  | 949.5  | 90  | 38 |
| DPYD   | ADVVISAFGSVLSDPK     | 16.8 | 802.9  | 244.2  | 90  | 38 |
| DPYD   | ADVVISAFGSVLSDPK     | 16.8 | 806.9  | 1228.7 | 90  | 38 |
| DPYD   | ADVVISAFGSVLSDPK     | 16.8 | 806.9  | 1115.6 | 90  | 38 |
| DPYD   | ADVVISAFGSVLSDPK     | 16.8 | 806.9  | 1028.6 | 90  | 38 |
| DPYD   | ADVVISAFGSVLSDPK     | 16.8 | 806.9  | 957.5  | 90  | 38 |
| DPYD   | ADVVISAFGSVLSDPK     | 16.8 | 806.9  | 252.2  | 90  | 38 |
| DPYD   | DSADIESILALNPR       | 16.3 | 757.4  | 1012.6 | 86  | 36 |
| DPYD   | DSADIESILALNPR       | 16.3 | 757.4  | 683.4  | 86  | 36 |
| DPYD   | DSADIESILALNPR       | 16.3 | 757.4  | 570.3  | 86  | 36 |
| DPYD   | DSADIESILALNPR       | 16.3 | 757.4  | 386.2  | 86  | 36 |
| DPYD   | DSADIESILALNPR       | 16.3 | 757.4  | 272.2  | 86  | 36 |
| DPYD   | DSADIESILALNPR       | 16.3 | 762.4  | 1022.6 | 86  | 36 |
| DPYD   | DSADIESILALNPR       | 16.3 | 762.4  | 693.4  | 86  | 36 |
| DPYD   | DSADIESILALNPR       | 16.3 | 762.4  | 580.3  | 86  | 36 |
| DPYD   | DSADIESILALNPR       | 16.3 | 762.4  | 396.2  | 86  | 36 |
| DPYD   | DSADIESILALNPR       | 16.3 | 762.4  | 282.2  | 86  | 36 |
| DPYD   | LTPNVTDIVSIAR        | 16.0 | 699.9  | 874.5  | 82  | 28 |
| DPYD   | LTPNVTDIVSIAR        | 16.0 | 699.9  | 446.3  | 82  | 28 |
| DPYD   | LTPNVTDIVSIAR        | 16.0 | 699.9  | 592.8  | 82  | 28 |
| DPYD   | LTPNVTDIVSIAR        | 16.0 | 704.9  | 884.5  | 82  | 28 |
| DPYD   | LTPNVTDIVSIAR        | 16.0 | 704.9  | 597.8  | 82  | 28 |
| EPHX1  | VETSDEEIHDLHQR       | 8.7  | 427.7  | 689.8  | 62  | 25 |
| EPHX1  | VETSDEEIHDLHQR       | 8.7  | 427.7  | 459.7  | 62  | 25 |
| EPHX1  | VETSDEEIHDLHQR       | 8.7  | 427.7  | 403.2  | 62  | 25 |
| EPHX1  | VETSDEEIHDLHQR       | 8.7  | 430.2  | 651.3  | 62  | 25 |
| EPHX1  | VETSDEEIHDLHQR       | 8.7  | 430.2  | 408.2  | 62  | 25 |
| EPHX1  | YLEDGGLER            | 10.0 | 526.3  | 277.2  | 70  | 28 |
| EPHX1  | YLEDGGLER            | 10.0 | 526.3  | 775.4  | 70  | 28 |
| EPHX1  | YLEDGGLER            | 10.0 | 526.3  | 646.3  | 70  | 28 |
| EPHX1  | YLEDGGLER            | 10.0 | 531.3  | 277.2  | 70  | 28 |
| EPHX1  | YLEDGGLER            | 10.0 | 531.3  | 785.4  | 70  | 28 |
| EPHX2  | ASPSEVVFLDDIGANLKPAR | 18.0 | 700.4  | 764.9  | 82  | 31 |
| EPHX2  | ASPSEVVFLDDIGANLKPAR | 18.0 | 700.4  | 715.4  | 82  | 31 |
| EPHX2  | ASPSEVVFLDDIGANLKPAR | 18.0 | 700.4  | 641.9  | 82  | 31 |
| EPHX2  | ASPSEVVFLDDIGANLKPAR | 18.0 | 703.7  | 769.9  | 82  | 31 |
| EPHX2  | ASPSEVVFLDDIGANLKPAR | 18.0 | 703.7  | 720.4  | 82  | 31 |
| EPHX2  | GLLNDAFQK            | 13.2 | 503.3  | 835.4  | 68  | 23 |
| EPHX2  | GLLNDAFQK            | 13.2 | 503.3  | 722.3  | 68  | 23 |
| EPHX2  | GLLNDAFQK            | 13.2 | 503.3  | 418.2  | 68  | 23 |
| EPHX2  | GLLNDAFQK            | 13.2 | 507.3  | 730.4  | 68  | 23 |
| EPHX2  | GLLNDAFQK            | 13.2 | 507.3  | 422.2  | 68  | 23 |
| EPHX2  | VCEAGGLFVNSPEEPSLSR  | 17.5 | 1024.5 | 1115.5 | 106 | 50 |
| EPHX2  | VCEAGGLFVNSPEEPSLSR  | 17.5 | 1024.5 | 914.5  | 106 | 50 |
| EPHX2  | VCEAGGLFVNSPEEPSLSR  | 17.5 | 1024.5 | 559.3  | 106 | 50 |
| EPHX2  | VCEAGGLFVNSPEEPSLSR  | 17.5 | 1029.5 | 924.5  | 106 | 50 |

|       |                             |      |        |        |     |    |
|-------|-----------------------------|------|--------|--------|-----|----|
| EPHX2 | VCEAGGLFVNSPEEPSLS <u>R</u> | 17.5 | 1029.5 | 569.3  | 106 | 50 |
| FMO1  | SDDLGLWR                    | 14.2 | 509.8  | 203.1  | 68  | 27 |
| FMO1  | SDDLGLWR                    | 14.2 | 509.8  | 318.1  | 68  | 27 |
| FMO1  | SDDLGLWR                    | 14.2 | 509.8  | 588.3  | 68  | 27 |
| FMO1  | SDDLGLW <u>R</u>            | 14.2 | 514.8  | 318.1  | 68  | 27 |
| FMO1  | SDDLGLW <u>R</u>            | 14.2 | 514.8  | 598.3  | 68  | 27 |
| FMO1  | VEDGQASLYK                  | 9.1  | 555.3  | 229.1  | 72  | 24 |
| FMO1  | VEDGQASLYK                  | 9.1  | 555.3  | 881.4  | 72  | 24 |
| FMO1  | VEDGQASLYK                  | 9.1  | 555.3  | 310.2  | 72  | 24 |
| FMO1  | VEDGQASLY <u>K</u>          | 9.1  | 559.3  | 229.1  | 72  | 24 |
| FMO1  | VEDGQASLY <u>K</u>          | 9.1  | 559.3  | 889.5  | 72  | 24 |
| FMO3  | LVGPGQWPGAR                 | 12.3 | 569.3  | 400.2  | 73  | 25 |
| FMO3  | LVGPGQWPGAR                 | 12.3 | 569.3  | 463.2  | 73  | 25 |
| FMO3  | LVGPGQWPGAR                 | 12.3 | 569.3  | 434.7  | 73  | 25 |
| FMO3  | LVGPGQWPGAR <u>R</u>        | 12.3 | 574.3  | 410.2  | 73  | 25 |
| FMO3  | LVGPGQWPGAR <u>R</u>        | 12.3 | 574.3  | 468.2  | 73  | 25 |
| FMO3  | NNLPTAISDWLYVK              | 18.7 | 817.4  | 342.2  | 91  | 31 |
| FMO3  | NNLPTAISDWLYVK              | 18.7 | 817.4  | 1292.7 | 91  | 31 |
| FMO3  | NNLPTAISDWLYVK              | 18.7 | 817.4  | 646.8  | 91  | 31 |
| FMO3  | NNLPTAISDWLYV <u>K</u>      | 18.7 | 821.4  | 342.2  | 91  | 31 |
| FMO3  | NNLPTAISDWLYV <u>K</u>      | 18.7 | 821.4  | 1300.7 | 91  | 31 |
| FMO3  | VAIIGAGVSGLASIR             | 15.6 | 692.4  | 987.6  | 82  | 34 |
| FMO3  | VAIIGAGVSGLASIR             | 15.6 | 692.4  | 703.4  | 82  | 34 |
| FMO3  | VAIIGAGVSGLASIR             | 15.6 | 692.4  | 550.8  | 82  | 34 |
| FMO3  | VAIIGAGVSGLASIR <u>R</u>    | 15.6 | 697.4  | 997.6  | 82  | 34 |
| FMO3  | VAIIGAGVSGLASIR <u>R</u>    | 15.6 | 697.4  | 713.4  | 82  | 34 |
| GSTA1 | LHYFNAR                     | 9.4  | 460.7  | 251.2  | 65  | 22 |
| GSTA1 | LHYFNAR                     | 9.4  | 460.7  | 670.3  | 65  | 22 |
| GSTA1 | LHYFNAR                     | 9.4  | 460.7  | 404.2  | 65  | 22 |
| GSTA1 | LHYFNAR <u>R</u>            | 9.4  | 465.7  | 251.2  | 65  | 22 |
| GSTA1 | LHYFNAR <u>R</u>            | 9.4  | 465.7  | 680.3  | 65  | 22 |
| GSTA2 | LALIQEK                     | 10.9 | 407.8  | 701.4  | 61  | 19 |
| GSTA2 | LALIQEK                     | 10.9 | 407.8  | 630.4  | 61  | 19 |
| GSTA2 | LALIQEK                     | 10.9 | 407.8  | 517.3  | 61  | 19 |
| GSTA2 | LALIQE <u>K</u>             | 10.9 | 411.8  | 709.4  | 61  | 19 |
| GSTA2 | LALIQE <u>K</u>             | 10.9 | 411.8  | 638.4  | 61  | 19 |
| GSTA2 | LHYSNIR                     | 8.4  | 451.7  | 652.3  | 64  | 22 |
| GSTA2 | LHYSNIR                     | 8.4  | 451.7  | 489.3  | 64  | 22 |
| GSTA2 | LHYSNIR                     | 8.4  | 451.7  | 395.2  | 64  | 22 |
| GSTA2 | LHYSNIR <u>R</u>            | 8.4  | 456.8  | 499.3  | 64  | 22 |
| GSTA2 | LHYSNIR <u>R</u>            | 8.4  | 456.8  | 400.2  | 64  | 22 |
| GSTA3 | FIGSAEDLGK                  | 10.9 | 518.8  | 632.3  | 69  | 23 |
| GSTA3 | FIGSAEDLGK                  | 10.9 | 518.8  | 432.2  | 69  | 23 |
| GSTA3 | FIGSAEDLGK                  | 10.9 | 518.8  | 204.1  | 69  | 23 |
| GSTA3 | FIGSAEDLGK                  | 13.2 | 522.8  | 261.2  | 69  | 28 |
| GSTA3 | FIGSAEDLGK                  | 13.2 | 522.8  | 784.4  | 69  | 28 |
| GSTA3 | FIGSAEDLGK                  | 13.2 | 522.8  | 261.2  | 69  | 28 |
| GSTA3 | FIGSAEDLGK                  | 13.2 | 522.8  | 784.4  | 69  | 28 |
| GSTA3 | FIGSAEDLG <u>K</u>          | 10.9 | 522.8  | 261.2  | 69  | 23 |
| GSTA3 | FIGSAEDLG <u>K</u>          | 10.9 | 522.8  | 784.4  | 69  | 23 |

|       |                                   |      |       |        |     |    |
|-------|-----------------------------------|------|-------|--------|-----|----|
| GSTA3 | LHYFN <u>G</u> R                  | 13.3 | 302.8 | 338.2  | 53  | 14 |
| GSTA3 | LHYFN <u>G</u> R                  | 13.3 | 302.8 | 232.1  | 53  | 14 |
| GSTA3 | LHYFN <u>G</u> R                  | 13.3 | 302.8 | 346.2  | 53  | 14 |
| GSTA3 | LHYFN <u>G</u> R                  | 13.3 | 302.8 | 338.2  | 53  | 14 |
| GSTA3 | LHYFN <u>G</u> R                  | 13.3 | 302.8 | 232.1  | 53  | 14 |
| GSTA3 | LHYFN <u>G</u> R                  | 13.3 | 302.8 | 346.2  | 53  | 14 |
| GSTA3 | LHYFN <u>G</u> R                  | 13.3 | 306.2 | 242.1  | 53  | 14 |
| GSTA3 | LHYFN <u>G</u> R                  | 13.3 | 306.2 | 356.2  | 53  | 14 |
| GSTA3 | LHYFN <u>G</u> R                  | 13.3 | 306.2 | 242.1  | 53  | 14 |
| GSTA3 | LHYFN <u>G</u> R                  | 13.3 | 306.2 | 356.2  | 53  | 14 |
| GSTA4 | YFPVFEK                           | 14.0 | 465.2 | 311.1  | 65  | 21 |
| GSTA4 | YFPVFEK                           | 14.0 | 465.2 | 619.3  | 65  | 21 |
| GSTA4 | YFPVFEK                           | 14.0 | 465.2 | 423.2  | 65  | 21 |
| GSTA4 | YFPVFEK                           | 14.0 | 465.2 | 276.2  | 65  | 21 |
| GSTA4 | YFPVFEK                           | 14.0 | 465.2 | 310.2  | 65  | 21 |
| GSTA4 | YFPVFE <u>K</u>                   | 14.0 | 469.2 | 311.1  | 65  | 21 |
| GSTA4 | YFPVFE <u>K</u>                   | 14.0 | 469.2 | 627.4  | 65  | 21 |
| GSTA5 | FLESAEDLDK                        | 11.6 | 583.8 | 261.2  | 74  | 30 |
| GSTA5 | FLESAEDLDK                        | 11.6 | 583.8 | 390.2  | 74  | 30 |
| GSTA5 | FLESAEDLDK                        | 11.6 | 583.8 | 906.4  | 74  | 30 |
| GSTA5 | FLESAEDLDK                        | 11.6 | 583.8 | 261.2  | 74  | 30 |
| GSTA5 | FLESAEDLDK                        | 11.6 | 583.8 | 390.2  | 74  | 30 |
| GSTA5 | FLESAEDLDK                        | 11.6 | 583.8 | 906.4  | 74  | 30 |
| GSTA5 | FLESAEDLD <u>K</u>                | 11.6 | 587.8 | 261.2  | 74  | 30 |
| GSTA5 | FLESAEDLD <u>K</u>                | 11.6 | 587.8 | 390.2  | 74  | 30 |
| GSTA5 | FLESAEDLD <u>K</u>                | 11.6 | 587.8 | 261.2  | 74  | 30 |
| GSTA5 | FLESAEDLD <u>K</u>                | 11.6 | 587.8 | 390.2  | 74  | 30 |
| GSTA5 | FLQPGSQR                          | 8.2  | 466.8 | 261.2  | 65  | 26 |
| GSTA5 | FLQPGSQR                          | 8.2  | 466.8 | 544.3  | 65  | 26 |
| GSTA5 | FLQPGSQR                          | 8.2  | 466.8 | 672.3  | 65  | 26 |
| GSTA5 | FLQPGSQR                          | 8.2  | 466.8 | 261.2  | 65  | 26 |
| GSTA5 | FLQPGSQR                          | 8.2  | 466.8 | 544.3  | 65  | 26 |
| GSTA5 | FLQPGSQR                          | 8.2  | 466.8 | 672.3  | 65  | 26 |
| GSTA5 | FLQPGSQR                          | 8.2  | 471.8 | 261.2  | 65  | 26 |
| GSTA5 | FLQPGSQR                          | 8.2  | 471.8 | 554.3  | 65  | 26 |
| GSTA5 | FLQPGSQR                          | 8.2  | 471.8 | 261.2  | 65  | 26 |
| GSTA5 | FLQPGSQR                          | 8.2  | 471.8 | 554.3  | 65  | 26 |
| GSTM2 | NQVFEP <u>S</u> CLDAFPNLK         | 16.4 | 940.0 | 689.4  | 100 | 48 |
| GSTM2 | NQVFEP <u>S</u> CLDAFPNLK         | 16.4 | 940.0 | 618.4  | 100 | 48 |
| GSTM2 | NQVFEP <u>S</u> CLDAFPNLK         | 16.4 | 940.0 | 471.3  | 100 | 48 |
| GSTM2 | NQVFEP <u>S</u> CLDAFPNL <u>K</u> | 16.4 | 944.0 | 1269.6 | 100 | 48 |
| GSTM2 | NQVFEP <u>S</u> CLDAFPNL <u>K</u> | 16.4 | 944.0 | 479.3  | 100 | 48 |
| GSTM3 | FSWFAGEK                          | 14.6 | 486.2 | 235.1  | 67  | 21 |
| GSTM3 | FSWFAGEK                          | 14.6 | 486.2 | 737.4  | 67  | 21 |
| GSTM3 | FSWFAGEK                          | 14.6 | 486.2 | 404.2  | 67  | 21 |
| GSTM3 | FSWFAGE <u>K</u>                  | 14.6 | 490.2 | 235.1  | 67  | 21 |
| GSTM3 | FSWFAGE <u>K</u>                  | 14.6 | 490.2 | 745.4  | 67  | 21 |
| GSTM4 | IFEPN <u>C</u> LDAFPNLK           | 16.4 | 839.4 | 1288.6 | 92  | 44 |
| GSTM4 | IFEPN <u>C</u> LDAFPNLK           | 16.4 | 839.4 | 804.4  | 92  | 44 |
| GSTM4 | IFEPN <u>C</u> LDAFPNLK           | 16.4 | 839.4 | 618.4  | 92  | 44 |



|         |                                  |      |       |       |    |    |
|---------|----------------------------------|------|-------|-------|----|----|
| GSTM4   | IFEPN <u>C</u> LDAFPNLK          | 16.4 | 839.4 | 471.3 | 92 | 44 |
| GSTM4   | IFEPN <u>C</u> LDAFPNLK          | 16.4 | 839.4 | 709.3 | 92 | 44 |
| GSTM4   | IFEPN <u>C</u> LDAFPNL <u>K</u>  | 16.4 | 843.4 | 626.4 | 92 | 44 |
| GSTM4   | IFEPN <u>C</u> LDAFPNL <u>K</u>  | 16.4 | 843.4 | 479.3 | 92 | 44 |
| GSTM4   | ITFVDFLAYDVLDLHR                 | 23.7 | 646.3 | 861.9 | 78 | 33 |
| GSTM4   | ITFVDFLAYDVLDLHR                 | 23.7 | 646.3 | 861.9 | 78 | 33 |
| GSTM4   | ITFVDFLAYDVLDLHR <u>R</u>        | 23.7 | 649.7 | 867.0 | 78 | 33 |
| GSTM4   | ITFVDFLAYDVLDLHR <u>R</u>        | 23.7 | 649.7 | 867.0 | 78 | 33 |
| GSTM4   | RPWFVGDK                         | 10.9 | 502.8 | 587.3 | 68 | 27 |
| GSTM4   | RPWFVGDK                         | 10.9 | 502.8 | 686.4 | 68 | 27 |
| GSTM4   | RPWFVGDK                         | 10.9 | 502.8 | 858.4 | 68 | 27 |
| GSTM4   | RPWFVGDK                         | 10.9 | 502.8 | 319.2 | 68 | 27 |
| GSTM4   | RPWFVGDK                         | 10.9 | 502.8 | 587.3 | 68 | 27 |
| GSTM4   | RPWFVGDK                         | 10.9 | 502.8 | 686.4 | 68 | 27 |
| GSTM4   | RPWFVGDK                         | 10.9 | 502.8 | 858.4 | 68 | 27 |
| GSTM4   | RPWFVGDK                         | 10.9 | 502.8 | 319.2 | 68 | 27 |
| GSTM4   | RPWFVGD <u>K</u>                 | 10.9 | 506.8 | 587.3 | 68 | 27 |
| GSTM4   | RPWFVGD <u>K</u>                 | 10.9 | 506.8 | 327.2 | 68 | 27 |
| GSTM4   | RPWFVGD <u>K</u>                 | 10.9 | 506.8 | 587.3 | 68 | 27 |
| GSTM4   | RPWFVGD <u>K</u>                 | 10.9 | 506.8 | 327.2 | 68 | 27 |
| GSTP1   | EEVTVETWQEGSLK                   | 13.8 | 867.4 | 948.5 | 94 | 35 |
| GSTP1   | EEVTVETWQEGSLK                   | 13.8 | 867.4 | 847.4 | 94 | 35 |
| GSTP1   | EEVTVETWQEGSLK                   | 13.8 | 867.4 | 260.2 | 94 | 35 |
| GSTP1   | EEVTVETWQEGSL <u>K</u>           | 13.8 | 871.4 | 855.4 | 94 | 35 |
| GSTP1   | EEVTVETWQEGSL <u>K</u>           | 13.8 | 871.4 | 268.2 | 94 | 35 |
| GSTT1   | VDEYLAWQHHTTLR                   | 13.3 | 544.6 | 563.3 | 71 | 22 |
| GSTT1   | VDEYLAWQHHTTLR                   | 13.3 | 544.6 | 506.8 | 71 | 22 |
| GSTT1   | VDEYLAWQHHTTL <u>R</u>           | 13.3 | 547.9 | 771.9 | 71 | 22 |
| GSTT1   | VDEYLAWQHHTTL <u>R</u>           | 13.3 | 547.9 | 714.4 | 71 | 22 |
| GSTT1   | VEAAVGEDLFQEAHEVILK              | 16.5 | 699.7 | 935.0 | 82 | 31 |
| GSTT1   | VEAAVGEDLFQEAHEVILK              | 16.5 | 699.7 | 864.0 | 82 | 31 |
| GSTT1   | VEAAVGEDLFQEAHEVILK              | 16.5 | 699.7 | 814.4 | 82 | 31 |
| GSTT1   | VEAAVGEDLFQEAHEVIL <u>K</u>      | 16.5 | 702.4 | 939.0 | 82 | 31 |
| GSTT1   | VEAAVGEDLFQEAHEVIL <u>K</u>      | 16.5 | 702.4 | 818.4 | 82 | 31 |
| SULT1A1 | ILEFVGR                          | 13.2 | 417.3 | 607.3 | 80 | 24 |
| SULT1A1 | ILEFVGR                          | 13.2 | 417.3 | 478.3 | 80 | 24 |
| SULT1A1 | ILEFVGR                          | 13.2 | 417.3 | 356.2 | 80 | 24 |
| SULT1A1 | ILEFVGR                          | 13.2 | 417.3 | 331.2 | 80 | 24 |
| SULT1A1 | SLPEETVDFVQHTSFK                 | 17.5 | 655.0 | 201.1 | 79 | 26 |
| SULT1A1 | SLPEETVDFVQHTSFK                 | 17.5 | 655.0 | 427.2 | 79 | 26 |
| SULT1A1 | SLPEETVDFVQHTSFK                 | 17.5 | 655.0 | 945.5 | 79 | 26 |
| SULT1A1 | SLPEETVDFVQHTS <u>F</u> <u>K</u> | 17.5 | 657.7 | 201.1 | 79 | 26 |
| SULT1A1 | SLPEETVDFVQHTS <u>F</u> <u>K</u> | 17.5 | 657.7 | 854.5 | 79 | 26 |
| SULT1A1 | TTFTVAQNER                       | 17.1 | 583.8 | 617.3 | 80 | 31 |
| SULT1A1 | TTFTVAQNER                       | 17.1 | 583.8 | 482.8 | 80 | 31 |
| SULT1A1 | TTFTVAQNER                       | 17.1 | 583.8 | 546.3 | 80 | 31 |
| SULT1A1 | TTFTVAQNER                       | 17.1 | 583.8 | 550.3 | 80 | 31 |
| SULT1A1 | VHPEPGTWDSFLE <u>K</u>           | 14.4 | 547.9 | 237.1 | 71 | 27 |
| SULT1A1 | VHPEPGTWDSFLEK                   | 14.4 | 821.4 | 237.1 | 91 | 37 |
| SULT1A1 | VHPEPGTWDSFLEK                   | 14.4 | 821.4 | 703.3 | 91 | 37 |

|         |                        |      |       |       |    |    |
|---------|------------------------|------|-------|-------|----|----|
| SULT1A1 | VHPEPGTWDSFLE <u>K</u> | 14.4 | 550.6 | 237.1 | 71 | 27 |
| SULT1A1 | VHPEPGTWDSFLE <u>K</u> | 14.4 | 825.4 | 237.1 | 91 | 37 |
| SULT1A2 | FDADYAK                | 12.1 | 415.2 | 263.1 | 61 | 24 |
| SULT1A2 | FDADYAK                | 12.1 | 415.2 | 334.1 | 61 | 24 |
| SULT1A2 | FDADYAK                | 12.1 | 415.2 | 449.2 | 61 | 24 |
| SULT1A2 | FDADYAK                | 12.1 | 415.2 | 567.3 | 61 | 24 |
| SULT1A2 | FDADYAK                | 12.1 | 415.2 | 682.3 | 61 | 24 |
| SULT1A2 | FDADYAK                | 12.1 | 415.2 | 263.1 | 61 | 24 |
| SULT1A2 | FDADYAK                | 12.1 | 415.2 | 334.1 | 61 | 24 |
| SULT1A2 | FDADYAK                | 12.1 | 415.2 | 449.2 | 61 | 24 |
| SULT1A2 | FDADYAK                | 12.1 | 415.2 | 567.3 | 61 | 24 |
| SULT1A2 | FDADYAK                | 12.1 | 415.2 | 682.3 | 61 | 24 |
| SULT1A2 | FDADYAK                | 12.1 | 419.2 | 263.1 | 61 | 24 |
| SULT1A2 | FDADYAK                | 12.1 | 419.2 | 575.3 | 61 | 24 |
| SULT1A2 | FDADYAK                | 12.1 | 419.2 | 263.1 | 61 | 24 |
| SULT1A2 | FDADYAK                | 12.1 | 419.2 | 575.3 | 61 | 24 |
| SULT1A2 | VYPHPGTWESFLEK         | 15.2 | 563.9 | 623.3 | 72 | 27 |
| SULT1A2 | VYPHPGTWESFLEK         | 15.2 | 563.9 | 795.9 | 72 | 27 |
| SULT1A2 | VYPHPGTWESFLEK         | 15.2 | 563.9 | 714.4 | 72 | 27 |
| SULT1A2 | VYPHPGTWESFLEK         | 15.2 | 563.9 | 597.3 | 72 | 27 |
| SULT1A2 | VYPHPGTWESFLE <u>K</u> | 15.2 | 566.6 | 718.4 | 72 | 27 |
| SULT1A2 | VYPHPGTWESFLE <u>K</u> | 15.2 | 566.6 | 601.3 | 72 | 27 |
| SULT1A3 | AHPEPGTWDSFLEK         | 14.9 | 538.6 | 209.1 | 70 | 27 |
| SULT1A3 | AHPEPGTWDSFLEK         | 14.9 | 538.6 | 690.3 | 70 | 27 |
| SULT1A3 | AHPEPGTWDSFLEK         | 14.9 | 538.6 | 345.7 | 70 | 27 |
| SULT1A3 | AHPEPGTWDSFLEK         | 14.9 | 538.6 | 738.4 | 70 | 27 |
| SULT1A3 | AHPEPGTWDSFLEK         | 14.9 | 538.6 | 924.4 | 70 | 27 |
| SULT1A3 | AHPEPGTWDSFLEK         | 14.9 | 538.6 | 209.1 | 70 | 27 |
| SULT1A3 | AHPEPGTWDSFLEK         | 14.9 | 538.6 | 690.3 | 70 | 27 |
| SULT1A3 | AHPEPGTWDSFLEK         | 14.9 | 538.6 | 345.7 | 70 | 27 |
| SULT1A3 | AHPEPGTWDSFLEK         | 14.9 | 538.6 | 738.4 | 70 | 27 |
| SULT1A3 | AHPEPGTWDSFLEK         | 14.9 | 538.6 | 924.4 | 70 | 27 |
| SULT1A3 | AHPEPGTWDSFLE <u>K</u> | 14.9 | 541.3 | 209.1 | 70 | 27 |
| SULT1A3 | AHPEPGTWDSFLE <u>K</u> | 14.9 | 541.3 | 746.4 | 70 | 27 |
| SULT1A3 | AHPEPGTWDSFLE <u>K</u> | 14.9 | 541.3 | 209.1 | 70 | 27 |
| SULT1A3 | AHPEPGTWDSFLE <u>K</u> | 14.9 | 541.3 | 746.4 | 70 | 27 |
| SULT1A3 | DVAVSYYHFHR            | 17.1 | 349.2 | 215.1 | 57 | 17 |
| SULT1A3 | DVAVSYYHFHR            | 17.1 | 349.2 | 286.1 | 57 | 17 |
| SULT1A3 | DVAVSYYHFHR            | 17.1 | 349.2 | 385.2 | 57 | 17 |
| SULT1A3 | DVAVSYYHFHR            | 17.1 | 349.2 | 236.6 | 57 | 17 |
| SULT1A3 | DVAVSYYHFHR            | 17.1 | 349.2 | 459.2 | 57 | 17 |
| SULT1A3 | DVAVSYYHFHR            | 17.1 | 349.2 | 596.3 | 57 | 17 |
| SULT1A3 | DVAVSYYHFHR            | 17.1 | 349.2 | 215.1 | 57 | 17 |
| SULT1A3 | DVAVSYYHFHR            | 17.1 | 349.2 | 286.1 | 57 | 17 |
| SULT1A3 | DVAVSYYHFHR            | 17.1 | 349.2 | 385.2 | 57 | 17 |
| SULT1A3 | DVAVSYYHFHR            | 17.1 | 349.2 | 236.6 | 57 | 17 |
| SULT1A3 | DVAVSYYHFHR            | 17.1 | 349.2 | 459.2 | 57 | 17 |
| SULT1A3 | DVAVSYYHFHR            | 17.1 | 349.2 | 596.3 | 57 | 17 |
| SULT1A3 | DVAVSYYHFHR            | 17.1 | 351.7 | 215.1 | 57 | 17 |
| SULT1A3 | DVAVSYYHFHR            | 17.1 | 351.7 | 385.2 | 57 | 17 |

|         |               |      |       |        |    |    |
|---------|---------------|------|-------|--------|----|----|
| SULT1A3 | DVAVSYHFHR    | 17.1 | 351.7 | 215.1  | 57 | 17 |
| SULT1A3 | DVAVSYHFHR    | 17.1 | 351.7 | 385.2  | 57 | 17 |
| SULT1B1 | NYFTVAQNEK    | 11.0 | 607.3 | 278.1  | 75 | 28 |
| SULT1B1 | NYFTVAQNEK    | 11.0 | 607.3 | 425.2  | 75 | 28 |
| SULT1B1 | NYFTVAQNEK    | 11.0 | 607.3 | 789.4  | 75 | 28 |
| SULT1B1 | NYFTVAQNEK    | 11.0 | 611.3 | 278.1  | 75 | 28 |
| SULT1B1 | NYFTVAQNEK    | 11.0 | 611.3 | 425.2  | 75 | 28 |
| SULT1E1 | LIHFLER       | 13.8 | 464.3 | 364.2  | 65 | 26 |
| SULT1E1 | LIHFLER       | 13.8 | 464.3 | 701.4  | 65 | 26 |
| SULT1E1 | LIHFLER       | 13.8 | 464.3 | 351.2  | 65 | 26 |
| SULT1E1 | LIHFLER       | 13.8 | 464.3 | 364.2  | 65 | 26 |
| SULT1E1 | LIHFLER       | 13.8 | 464.3 | 701.4  | 65 | 26 |
| SULT1E1 | LIHFLER       | 13.8 | 464.3 | 351.2  | 65 | 26 |
| SULT1E1 | LIHFLER       | 13.8 | 469.3 | 574.3  | 65 | 26 |
| SULT1E1 | LIHFLER       | 13.8 | 469.3 | 356.2  | 65 | 26 |
| SULT1E1 | LIHFLER       | 13.8 | 469.3 | 574.3  | 65 | 26 |
| SULT1E1 | LIHFLER       | 13.8 | 469.3 | 356.2  | 65 | 26 |
| SULT1E1 | NHFTVALNEK    | 11.2 | 586.8 | 399.2  | 74 | 30 |
| SULT1E1 | NHFTVALNEK    | 11.2 | 586.8 | 574.3  | 74 | 30 |
| SULT1E1 | NHFTVALNEK    | 11.2 | 586.8 | 774.4  | 74 | 30 |
| SULT1E1 | NHFTVALNEK    | 11.2 | 586.8 | 921.5  | 74 | 30 |
| SULT1E1 | NHFTVALNEK    | 11.2 | 586.8 | 399.2  | 74 | 30 |
| SULT1E1 | NHFTVALNEK    | 11.2 | 586.8 | 574.3  | 74 | 30 |
| SULT1E1 | NHFTVALNEK    | 11.2 | 586.8 | 774.4  | 74 | 30 |
| SULT1E1 | NHFTVALNEK    | 11.2 | 586.8 | 921.5  | 74 | 30 |
| SULT1E1 | NHFTVALNEK    | 11.2 | 590.8 | 399.2  | 74 | 30 |
| SULT1E1 | NHFTVALNEK    | 11.2 | 590.8 | 582.3  | 74 | 30 |
| SULT1E1 | NHFTVALNEK    | 11.2 | 590.8 | 399.2  | 74 | 30 |
| SULT1E1 | NHFTVALNEK    | 11.2 | 590.8 | 582.3  | 74 | 30 |
| SULT2A1 | LFSSHLPIQLFPK | 18.1 | 763.9 | 842.5  | 80 | 39 |
| SULT2A1 | LFSSHLPIQLFPK | 18.1 | 763.9 | 955.6  | 80 | 39 |
| SULT2A1 | LFSSHLPIQLFPK | 18.1 | 763.9 | 633.9  | 80 | 39 |
| SULT2A1 | LFSSHLPIQLFPK | 18.1 | 763.9 | 1092.7 | 80 | 39 |
| SULT2A1 | NFLLLSYEELK   | 17.9 | 684.9 | 881.5  | 80 | 36 |
| SULT2A1 | NFLLLSYEELK   | 17.9 | 684.9 | 768.4  | 80 | 36 |
| SULT2A1 | NFLLLSYEELK   | 17.9 | 684.9 | 375.2  | 80 | 36 |
| SULT2A1 | NFLLLSYEELK   | 17.9 | 684.9 | 994.6  | 80 | 36 |
| SULT2A1 | NHFTVAQAEDFDK | 11.2 | 761.4 | 399.2  | 87 | 33 |
| SULT2A1 | NHFTVAQAEDFDK | 11.2 | 761.4 | 1270.6 | 87 | 33 |
| SULT2A1 | NHFTVAQAEDFDK | 11.2 | 761.4 | 1123.5 | 87 | 33 |
| SULT2A1 | NHFTVAQAEDFDK | 11.2 | 765.4 | 399.2  | 87 | 33 |
| SULT2A1 | NHFTVAQAEDFDK | 11.2 | 765.4 | 1131.5 | 87 | 33 |
| SULT2A1 | TLEPEELNLILK  | 16.9 | 706.4 | 344.2  | 83 | 33 |
| SULT2A1 | TLEPEELNLILK  | 16.9 | 706.4 | 1068.6 | 83 | 33 |
| SULT2A1 | TLEPEELNLILK  | 16.9 | 706.4 | 260.2  | 83 | 33 |
| SULT2A1 | TLEPEELNLILK  | 17.3 | 706.4 | 1068.6 | 80 | 37 |
| SULT2A1 | TLEPEELNLILK  | 17.3 | 706.4 | 599.3  | 80 | 37 |
| SULT2A1 | TLEPEELNLILK  | 17.3 | 706.4 | 1197.7 | 80 | 37 |
| SULT2A1 | TLEPEELNLILK  | 17.3 | 706.4 | 344.2  | 80 | 37 |
| SULT2A1 | TLEPEELNLILK  | 13.9 | 710.4 | 344.2  | 83 | 34 |

|         |                      |      |       |        |    |    |
|---------|----------------------|------|-------|--------|----|----|
| SULT2A1 | TLEPEELNLILK         | 13.9 | 710.4 | 1076.6 | 83 | 34 |
| SULT2A1 | TLEPEELNLILK         | 13.9 | 710.4 | 344.2  | 83 | 34 |
| SULT2A1 | TLEPEELNLILK         | 13.9 | 710.4 | 1076.6 | 83 | 34 |
| SULT2A1 | TLEPEELNLIL <u>K</u> | 16.9 | 710.4 | 344.2  | 83 | 33 |
| SULT2A1 | TLEPEELNLIL <u>K</u> | 16.9 | 710.4 | 1076.6 | 83 | 33 |
| SULT4A1 | DLVVSYYQFHR          | 13.6 | 713.9 | 1099.5 | 83 | 32 |
| SULT4A1 | DLVVSYYQFHR          | 13.6 | 713.9 | 1000.5 | 83 | 32 |
| SULT4A1 | DLVVSYYQFHR          | 13.6 | 713.9 | 550.3  | 83 | 32 |
| SULT4A1 | DLVVSYYQFHR          | 13.6 | 718.9 | 1010.5 | 83 | 32 |
| SULT4A1 | DLVVSYYQFHR          | 13.6 | 718.9 | 555.3  | 83 | 32 |
| SULT4A1 | FLPSDLHNGDSK         | 15.8 | 443.9 | 261.2  | 64 | 22 |
| SULT4A1 | FLPSDLHNGDSK         | 15.8 | 443.9 | 560.3  | 64 | 22 |
| SULT4A1 | FLPSDLHNGDSK         | 15.8 | 443.9 | 535.2  | 64 | 22 |
| SULT4A1 | FLPSDLHNGDSK         | 15.8 | 443.9 | 591.8  | 64 | 22 |
| SULT4A1 | FLPSDLHNGDSK         | 15.8 | 443.9 | 234.1  | 64 | 22 |
| SULT4A1 | FLPSDLHNGDSK         | 15.8 | 443.9 | 657.3  | 64 | 22 |
| SULT4A1 | FLPSDLHNGDSK         | 15.8 | 443.9 | 261.2  | 64 | 22 |
| SULT4A1 | FLPSDLHNGDSK         | 15.8 | 443.9 | 560.3  | 64 | 22 |
| SULT4A1 | FLPSDLHNGDSK         | 15.8 | 443.9 | 535.2  | 64 | 22 |
| SULT4A1 | FLPSDLHNGDSK         | 15.8 | 443.9 | 591.8  | 64 | 22 |
| SULT4A1 | FLPSDLHNGDSK         | 15.8 | 443.9 | 234.1  | 64 | 22 |
| SULT4A1 | FLPSDLHNGDSK         | 15.8 | 443.9 | 657.3  | 64 | 22 |
| SULT4A1 | FLPSDLHNGDSK         | 15.8 | 443.9 | 261.2  | 64 | 22 |
| SULT4A1 | FLPSDLHNGDSK         | 15.8 | 443.9 | 560.3  | 64 | 22 |
| SULT4A1 | FLPSDLHNGDSK         | 15.8 | 443.9 | 535.2  | 64 | 22 |
| SULT4A1 | FLPSDLHNGDSK         | 15.8 | 443.9 | 591.8  | 64 | 22 |
| SULT4A1 | FLPSDLHNGDSK         | 15.8 | 443.9 | 234.1  | 64 | 22 |
| SULT4A1 | FLPSDLHNGDSK         | 15.8 | 443.9 | 657.3  | 64 | 22 |
| SULT4A1 | FLPSDLHNGDSK         | 15.8 | 446.6 | 539.3  | 64 | 22 |
| SULT4A1 | FLPSDLHNGDSK         | 15.8 | 446.6 | 242.2  | 64 | 22 |
| SULT4A1 | FLPSDLHNGDSK         | 15.8 | 446.6 | 539.3  | 64 | 22 |
| SULT4A1 | FLPSDLHNGDSK         | 15.8 | 446.6 | 242.2  | 64 | 22 |
| SULT4A1 | YFEFHGVR             | 20.5 | 352.2 | 311.1  | 57 | 17 |
| SULT4A1 | YFEFHGVR             | 20.5 | 352.2 | 331.2  | 57 | 17 |
| SULT4A1 | YFEFHGVR             | 20.5 | 352.2 | 308.2  | 57 | 17 |
| SULT4A1 | YFEFHGVR             | 20.5 | 352.2 | 372.7  | 57 | 17 |
| SULT4A1 | YFEFHGVR             | 20.5 | 352.2 | 446.2  | 57 | 17 |
| SULT4A1 | YFEFHGVR             | 20.5 | 352.2 | 311.1  | 57 | 17 |
| SULT4A1 | YFEFHGVR             | 20.5 | 352.2 | 331.2  | 57 | 17 |
| SULT4A1 | YFEFHGVR             | 20.5 | 352.2 | 308.2  | 57 | 17 |
| SULT4A1 | YFEFHGVR             | 20.5 | 352.2 | 372.7  | 57 | 17 |
| SULT4A1 | YFEFHGVR             | 20.5 | 352.2 | 446.2  | 57 | 17 |
| SULT4A1 | YFEFHGVR             | 20.5 | 355.5 | 341.2  | 57 | 17 |
| SULT4A1 | YFEFHGVR             | 20.5 | 355.5 | 451.2  | 57 | 17 |
| SULT4A1 | YFEFHGVR             | 20.5 | 355.5 | 341.2  | 57 | 17 |
| SULT4A1 | YFEFHGVR             | 20.5 | 355.5 | 451.2  | 57 | 17 |
| TPMT    | NQVLTLEEWQDK         | 14.1 | 751.9 | 1048.5 | 86 | 35 |
| TPMT    | NQVLTLEEWQDK         | 14.1 | 751.9 | 947.4  | 86 | 35 |
| TPMT    | NQVLTLEEWQDK         | 14.1 | 751.9 | 834.4  | 86 | 35 |
| TPMT    | NQVLTLEEWQDK         | 14.1 | 751.9 | 705.3  | 86 | 35 |
| TPMT    | NQVLTLEEWQDK         | 14.1 | 751.9 | 576.3  | 86 | 35 |
| TPMT    | NQVLTLEEWQDK         | 14.1 | 755.9 | 1056.5 | 86 | 35 |
| TPMT    | NQVLTLEEWQDK         | 14.1 | 755.9 | 955.5  | 86 | 35 |
| TPMT    | NQVLTLEEWQDK         | 14.1 | 755.9 | 842.4  | 86 | 35 |
| TPMT    | NQVLTLEEWQDK         | 14.1 | 755.9 | 713.3  | 86 | 35 |
| TPMT    | NQVLTLEEWQDK         | 14.1 | 755.9 | 584.3  | 86 | 35 |

|        |                                 |      |       |        |    |    |
|--------|---------------------------------|------|-------|--------|----|----|
| TPMT   | SWGID <u>C</u> LFEK             | 17.6 | 627.8 | 536.3  | 77 | 30 |
| TPMT   | SWGID <u>C</u> LFEK             | 17.6 | 627.8 | 584.3  | 77 | 30 |
| TPMT   | SWGID <u>C</u> LFE <u>K</u>     | 17.6 | 631.8 | 331.1  | 77 | 30 |
| TPMT   | SWGID <u>C</u> LFE <u>K</u>     | 17.6 | 631.8 | 819.4  | 77 | 30 |
| UGT1A1 | DGAFYTLK                        | 12.4 | 457.7 | 244.1  | 80 | 16 |
| UGT1A1 | DGAFYTLK                        | 12.4 | 457.7 | 260.2  | 80 | 16 |
| UGT1A1 | DGAFYTL <u>K</u>                | 12.4 | 461.8 | 244.2  | 80 | 16 |
| UGT1A1 | DGAFYTL <u>K</u>                | 12.4 | 461.8 | 369.3  | 80 | 16 |
| UGT1A1 | DGAFYTL <u>K</u>                | 12.4 | 461.8 | 679.4  | 80 | 16 |
| UGT1A1 | ESFVSLGHNVFENDSFLQR             | 16.5 | 742.4 | 650.4  | 85 | 31 |
| UGT1A1 | ESFVSLGHNVFENDSFLQR             | 16.5 | 742.4 | 303.2  | 85 | 31 |
| UGT1A1 | ESFVSLGHNVFENDSFLQR             | 16.5 | 742.4 | 881.9  | 85 | 31 |
| UGT1A1 | ESFVSLGHNVFENDSFLQR             | 16.5 | 745.7 | 660.4  | 85 | 31 |
| UGT1A1 | ESFVSLGHNVFENDSFLQR             | 16.5 | 745.7 | 886.9  | 85 | 31 |
| UGT1A1 | GHEIVVLAPDASLYIR                | 14.5 | 585.0 | 819.5  | 74 | 22 |
| UGT1A1 | GHEIVVLAPDASLYIR                | 14.5 | 585.0 | 410.2  | 74 | 22 |
| UGT1A1 | GHEIVVLAPDASLYIR                | 14.5 | 585.0 | 467.8  | 74 | 22 |
| UGT1A1 | GHEIVVLAPDASLYIR                | 14.5 | 588.3 | 410.2  | 74 | 22 |
| UGT1A1 | GHEIVVLAPDASLYIR                | 14.5 | 588.3 | 472.8  | 74 | 22 |
| UGT1A3 | HLNATSFVLTDPVNL <u>C</u> AAVLAK | 20.0 | 856.8 | 886.4  | 94 | 37 |
| UGT1A3 | HLNATSFVLTDPVNL <u>C</u> AAVLAK | 20.0 | 856.8 | 1084.5 | 94 | 37 |
| UGT1A3 | HLNATSFVLTDPVNL <u>C</u> AAVLAK | 20.0 | 856.8 | 1155.7 | 94 | 37 |
| UGT1A3 | HLNATSFVLTDPVNL <u>C</u> AAVLAK | 20.0 | 856.8 | 959.5  | 94 | 37 |
| UGT1A3 | HLNATSFVLTDPVNL <u>C</u> AAVLAK | 20.0 | 859.5 | 1084.5 | 94 | 37 |
| UGT1A3 | HLNATSFVLTDPVNL <u>C</u> AAVLAK | 20.0 | 859.5 | 1163.7 | 94 | 37 |
| UGT1A3 | YLSIPTVFFLR                     | 20.3 | 678.4 | 277.2  | 80 | 27 |
| UGT1A3 | YLSIPTVFFLR                     | 20.3 | 678.4 | 879.5  | 80 | 27 |
| UGT1A3 | YLSIPTVFFLR                     | 20.3 | 678.4 | 1079.6 | 80 | 27 |
| UGT1A3 | YLSIPTVFFLR                     | 20.3 | 683.4 | 277.2  | 80 | 27 |
| UGT1A3 | YLSIPTVFFLR                     | 20.3 | 683.4 | 889.5  | 80 | 27 |
| UGT1A4 | FFTLTAYAVPWTQK                  | 18.6 | 836.9 | 992.5  | 92 | 32 |
| UGT1A4 | FFTLTAYAVPWTQK                  | 18.6 | 836.9 | 758.4  | 92 | 32 |
| UGT1A4 | FFTLTAYAVPWTQK                  | 18.6 | 836.9 | 659.4  | 92 | 32 |
| UGT1A4 | FFTLTAYAVPWTQ <u>K</u>          | 18.6 | 840.9 | 1000.5 | 92 | 32 |
| UGT1A4 | FFTLTAYAVPWTQ <u>K</u>          | 18.6 | 840.9 | 667.4  | 92 | 32 |
| UGT1A4 | GTQ <u>C</u> PNPSSYIPK          | 11.6 | 724.8 | 1002.5 | 84 | 28 |
| UGT1A4 | GTQ <u>C</u> PNPSSYIPK          | 11.6 | 724.8 | 791.4  | 84 | 28 |
| UGT1A4 | GTQ <u>C</u> PNPSSYIPK          | 11.6 | 724.8 | 244.2  | 84 | 28 |
| UGT1A4 | GTQ <u>C</u> PNPSSYIPK          | 11.6 | 724.8 | 581.8  | 84 | 28 |
| UGT1A4 | GTQ <u>C</u> PNPSSYIP <u>K</u>  | 11.6 | 728.9 | 1010.5 | 84 | 28 |
| UGT1A4 | GTQ <u>C</u> PNPSSYIP <u>K</u>  | 11.6 | 728.9 | 799.4  | 84 | 28 |
| UGT1A4 | GTQ <u>C</u> PNPSSYIP <u>K</u>  | 11.6 | 728.9 | 252.2  | 84 | 28 |
| UGT1A4 | GTQ <u>C</u> PNPSSYIP <u>K</u>  | 11.6 | 728.9 | 585.8  | 84 | 28 |
| UGT1A4 | YLSIPAVFFWR                     | 21.3 | 699.9 | 277.2  | 82 | 27 |
| UGT1A4 | YLSIPAVFFWR                     | 21.3 | 699.9 | 364.2  | 82 | 27 |
| UGT1A4 | YLSIPAVFFWR                     | 21.3 | 699.9 | 922.5  | 82 | 27 |
| UGT1A4 | YLSIPAVFFWR                     | 21.4 | 699.9 | 277.2  | 82 | 30 |
| UGT1A4 | YLSIPAVFFWR                     | 21.4 | 699.9 | 364.2  | 82 | 30 |
| UGT1A4 | YLSIPAVFFWR                     | 21.4 | 699.9 | 922.5  | 82 | 30 |
| UGT1A4 | YLSIPAVFFWR                     | 21.3 | 704.9 | 277.2  | 82 | 27 |

|         |                                  |      |        |        |     |    |
|---------|----------------------------------|------|--------|--------|-----|----|
| UGT1A4  | YLSIPAVFFW <u>R</u>              | 21.3 | 704.9  | 932.5  | 82  | 27 |
| UGT1A4  | YLSIPAVFFW <u>R</u>              | 21.4 | 704.9  | 277.2  | 82  | 30 |
| UGT1A4  | YLSIPAVFFW <u>R</u>              | 21.4 | 704.9  | 932.5  | 82  | 30 |
| UGT1A6  | DIVEVLSDR                        | 14.0 | 523.3  | 718.4  | 69  | 28 |
| UGT1A6  | DIVEVLSDR                        | 14.0 | 523.3  | 589.3  | 69  | 28 |
| UGT1A6  | DIVEVLSDR                        | 14.0 | 523.3  | 490.3  | 69  | 28 |
| UGT1A6  | DIVEVLSDR <u>R</u>               | 14.0 | 528.3  | 728.4  | 69  | 28 |
| UGT1A6  | DIVEVLSDR <u>R</u>               | 14.0 | 528.3  | 500.3  | 69  | 28 |
| UGT1A6  | SFLTAPQTEYR                      | 12.5 | 656.8  | 965.5  | 79  | 28 |
| UGT1A6  | SFLTAPQTEYR                      | 12.5 | 656.8  | 864.4  | 79  | 28 |
| UGT1A6  | SFLTAPQTEYR                      | 12.5 | 656.8  | 793.4  | 79  | 28 |
| UGT1A6  | SFLTAPQTEY <u>R</u>              | 12.5 | 661.8  | 803.4  | 79  | 28 |
| UGT1A6  | SFLTAPQTEY <u>R</u>              | 12.5 | 661.8  | 348.2  | 79  | 28 |
| UGT1A9  | AFAHAQWK                         | 9.3  | 320.2  | 444.2  | 55  | 15 |
| UGT1A9  | AFAHAQWK                         | 9.3  | 320.2  | 370.7  | 55  | 15 |
| UGT1A9  | AFAHAQWK                         | 9.3  | 320.2  | 335.2  | 55  | 15 |
| UGT1A9  | AFAHAQW <u>K</u>                 | 9.3  | 322.8  | 448.2  | 55  | 15 |
| UGT1A9  | AFAHAQW <u>K</u>                 | 9.3  | 322.8  | 374.7  | 55  | 15 |
| UGT1A9  | ESSFDAVFLDPFDN <u>C</u> GLIVAK   | 20.4 | 1172.6 | 736.3  | 117 | 44 |
| UGT1A9  | ESSFDAVFLDPFDN <u>C</u> GLIVAK   | 20.4 | 1172.6 | 1348.7 | 117 | 44 |
| UGT1A9  | ESSFDAVFLDPFDN <u>C</u> GLIVAK   | 20.4 | 1172.6 | 1233.6 | 117 | 44 |
| UGT1A9  | ESSFDAVFLDPFDN <u>C</u> GLIVAK   | 20.4 | 1176.6 | 736.3  | 117 | 44 |
| UGT1A9  | ESSFDAVFLDPFDN <u>C</u> GLIVAK   | 20.4 | 1176.6 | 1356.7 | 117 | 44 |
| UGT1A9  | ESSFDAVFLDPFDN <u>C</u> GLIVAK   | 20.4 | 1176.6 | 1241.6 | 117 | 44 |
| UGT2B10 | GHEVTVLASSASILFDPNDSSTLK         | 16.6 | 830.1  | 861.4  | 80  | 35 |
| UGT2B10 | GHEVTVLASSASILFDPNDSSTLK         | 16.6 | 830.1  | 1123.5 | 80  | 35 |
| UGT2B10 | GHEVTVLASSASILFDPNDSSTL <u>K</u> | 16.6 | 832.8  | 869.4  | 80  | 35 |
| UGT2B10 | GHEVTVLASSASILFDPNDSSTL <u>K</u> | 16.6 | 832.8  | 1131.5 | 80  | 35 |
| UGT2B11 | FTPGYTIER                        | 11.1 | 542.3  | 418.2  | 80  | 18 |
| UGT2B11 | FTPGYTIER                        | 11.1 | 542.3  | 738.4  | 80  | 18 |
| UGT2B11 | FTPGYTIER                        | 11.1 | 542.3  | 835.4  | 80  | 18 |
| UGT2B11 | FTPGYTIER <u>R</u>               | 11.1 | 547.3  | 423.2  | 80  | 18 |
| UGT2B11 | FTPGYTIER <u>R</u>               | 11.1 | 547.3  | 845.4  | 80  | 18 |
| UGT2B15 | NYLEDSELLK                       | 14.1 | 547.8  | 278.1  | 71  | 29 |
| UGT2B15 | NYLEDSELLK                       | 14.1 | 547.8  | 817.5  | 71  | 29 |
| UGT2B15 | NYLEDSELLK                       | 14.1 | 547.8  | 704.4  | 71  | 29 |
| UGT2B15 | NYLEDSELL <u>K</u>               | 14.1 | 551.8  | 278.1  | 71  | 29 |
| UGT2B15 | NYLEDSELL <u>K</u>               | 14.1 | 551.8  | 825.5  | 71  | 29 |
| UGT2B15 | SVINDPVYK                        | 10.6 | 517.8  | 848.5  | 69  | 23 |
| UGT2B15 | SVINDPVYK                        | 10.6 | 517.8  | 735.4  | 69  | 23 |
| UGT2B15 | SVINDPVYK                        | 10.6 | 517.8  | 424.7  | 69  | 23 |
| UGT2B15 | SVINDPVY <u>K</u>                | 10.6 | 521.8  | 856.5  | 69  | 23 |
| UGT2B15 | SVINDPVY <u>K</u>                | 10.6 | 521.8  | 428.7  | 69  | 23 |
| UGT2B17 | FSVGYTVEK                        | 11.4 | 515.3  | 235.1  | 69  | 27 |
| UGT2B17 | FSVGYTVEK                        | 11.4 | 515.3  | 882.5  | 69  | 27 |
| UGT2B17 | FSVGYTVEK                        | 11.4 | 515.3  | 795.4  | 69  | 27 |
| UGT2B17 | FSVGYTVEK                        | 11.4 | 515.3  | 696.4  | 69  | 27 |
| UGT2B17 | FSVGYTVEK                        | 11.4 | 515.3  | 639.3  | 69  | 27 |
| UGT2B17 | FSVGYTVE <u>K</u>                | 11.4 | 519.3  | 235.1  | 69  | 27 |
| UGT2B17 | FSVGYTVE <u>K</u>                | 11.4 | 519.3  | 704.4  | 69  | 27 |

|         |                    |      |        |       |    |    |
|---------|--------------------|------|--------|-------|----|----|
| UGT2B17 | SVINDPIYK          | 11.5 | 524.8  | 862.5 | 69 | 23 |
| UGT2B17 | SVINDPIYK          | 11.5 | 524.8  | 749.4 | 69 | 23 |
| UGT2B17 | SVINDPIYK          | 11.5 | 524.8  | 431.7 | 69 | 23 |
| UGT2B17 | SVINDPIY <u>K</u>  | 11.5 | 528.8  | 870.5 | 69 | 23 |
| UGT2B17 | SVINDPIY <u>K</u>  | 11.5 | 528.8  | 435.7 | 69 | 23 |
| UGT2B4  | FSPGYAIEK          | 10.0 | 1011.5 | 389.2 | 80 | 30 |
| UGT2B4  | FSPGYAIEK          | 10.0 | 1011.5 | 777.4 | 80 | 30 |
| UGT2B4  | FSPGYAIEK          | 10.0 | 1011.5 | 864.5 | 80 | 30 |
| UGT2B4  | FSPGYAIE <u>K</u>  | 10.0 | 1019.5 | 397.3 | 80 | 30 |
| UGT2B4  | TILDELVQR          | 15.3 | 543.8  | 872.5 | 71 | 28 |
| UGT2B4  | TILDELVQR          | 15.3 | 543.8  | 759.4 | 71 | 28 |
| UGT2B4  | TILDELVQR          | 15.3 | 543.8  | 644.4 | 71 | 28 |
| UGT2B4  | TILDELVQR          | 15.3 | 548.8  | 882.5 | 71 | 28 |
| UGT2B4  | TILDELVQR          | 15.3 | 548.8  | 769.4 | 71 | 28 |
| UGT2B7  | IEIYPTSLTK         | 13.1 | 582.8  | 922.5 | 74 | 25 |
| UGT2B7  | IEIYPTSLTK         | 13.1 | 582.8  | 809.4 | 74 | 25 |
| UGT2B7  | IEIYPTSLTK         | 13.1 | 582.8  | 646.4 | 74 | 25 |
| UGT2B7  | IEIYPTSLT <u>K</u> | 13.1 | 586.8  | 817.5 | 74 | 25 |
| UGT2B7  | IEIYPTSLT <u>K</u> | 13.1 | 586.8  | 654.4 | 74 | 25 |
| UGT2B7  | TILDELIQR          | 16.4 | 550.8  | 886.5 | 71 | 29 |
| UGT2B7  | TILDELIQR          | 16.4 | 550.8  | 773.4 | 71 | 29 |
| UGT2B7  | TILDELIQR          | 16.4 | 550.8  | 658.4 | 71 | 29 |
| UGT2B7  | TILDELIQR          | 16.4 | 550.8  | 416.3 | 71 | 29 |
| UGT2B7  | TILDELIQ <u>R</u>  | 16.4 | 555.8  | 896.5 | 71 | 29 |
| UGT2B7  | TILDELIQ <u>R</u>  | 16.4 | 555.8  | 783.4 | 71 | 29 |
| UGT2B7  | TILDELIQ <u>R</u>  | 16.4 | 555.8  | 668.4 | 71 | 29 |
| UGT2B7  | TILDELIQ <u>R</u>  | 16.4 | 555.8  | 426.3 | 71 | 29 |

**R**, **K** and **C** correspond to heavy arginine (R[13C6, 15N4]), heavy lysine (K[13C6, 15N2]) and carbamidomethylated cysteine (+57 Da).





**Supplementary Table 3S: Number of donors in subcellular fractions obtained from Xenotech, LLC and UW. Number in parenthesis indicates lot number.**

| <b>Organ</b>     | <b>Number of donors</b> |              |                |                       |
|------------------|-------------------------|--------------|----------------|-----------------------|
|                  | <b>Microsome</b>        | <b>S9</b>    | <b>Cytosol</b> | <b>Total Membrane</b> |
| <b>Liver</b>     | 200 (1410230)           | 50 (1210091) | 50 (1410012)   | 6                     |
| <b>Kidney</b>    | 13 (1410120)            | 13 (1410118) |                | 6                     |
| <b>Intestine</b> | 10 (1410074)            | 10 (1410073) |                |                       |
| <b>Lung</b>      | 4 (1310116)             |              |                |                       |

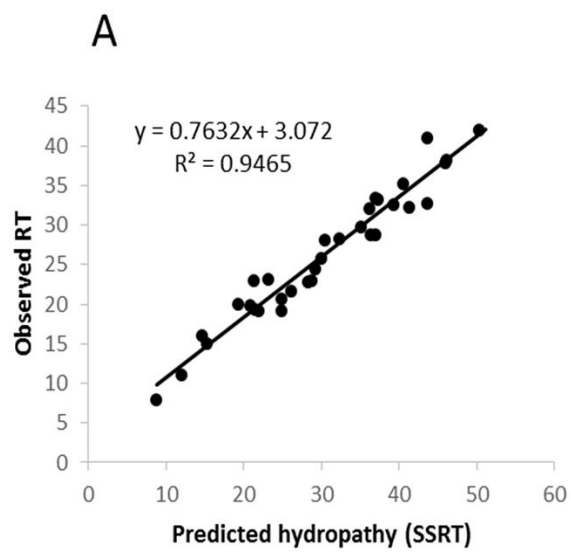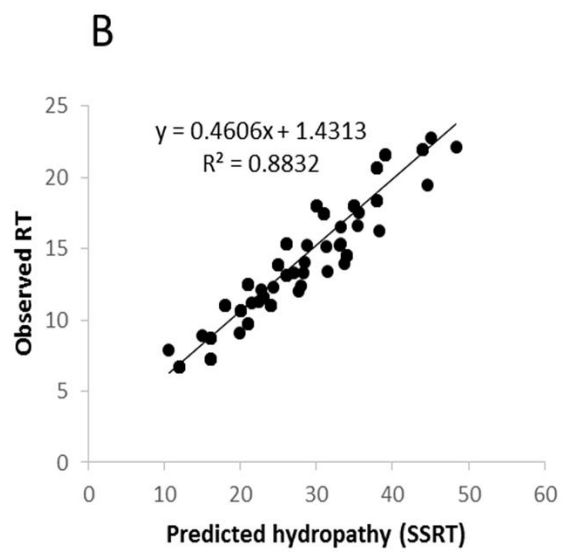

Supplementary Fig. 1S

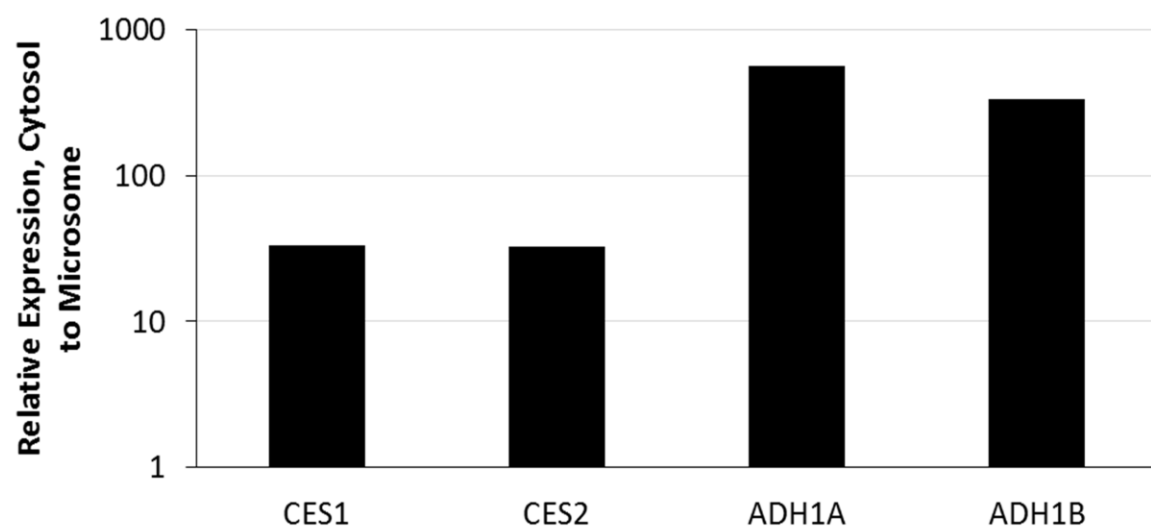

Supplementary Fig. 2S

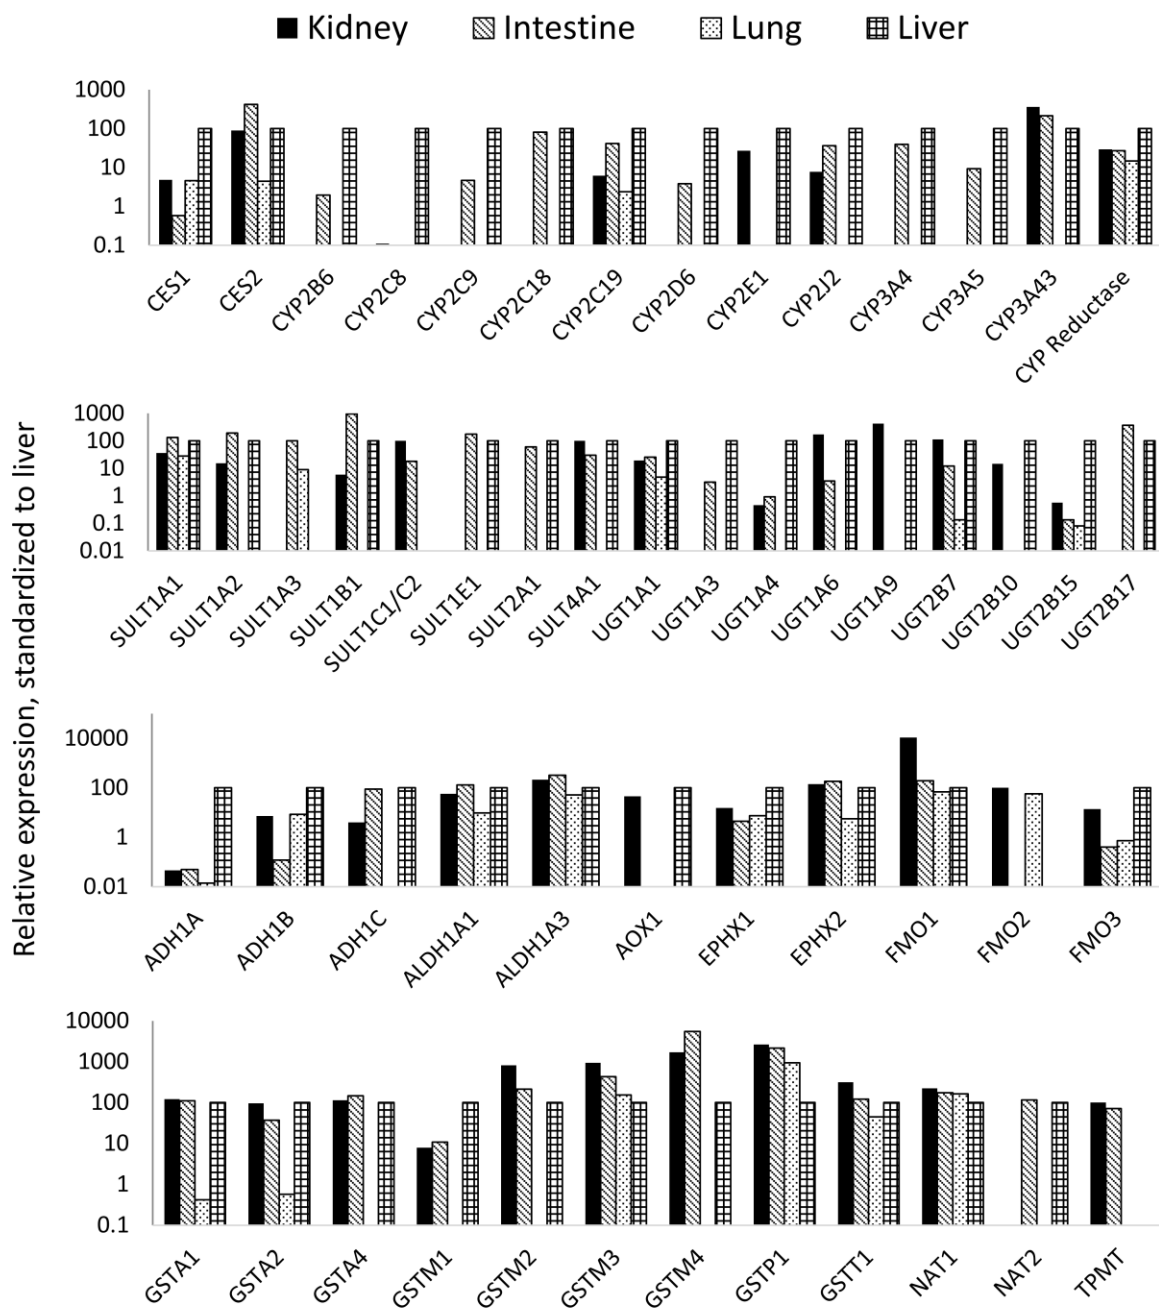

Supplementary Fig. 3S

Search

Search Option

Protein Name

Peptide Sequence

Uniprot Entry#

cyp1a2

Exact Match

Select MS instrument

- Select MS instrument
- Any
- AB Sciex TQ 6500
- Waters XEVO TQ-S
- Agilent QQQ

Select Species

- Select Species
- Any
- Human
- Mouse
- Rat
- Dog
- Monkey

| Protein Name | Uniprot number         | Peptide Sequence | SSRT | Observed RT | LC Method                   | Parent Ion | Fragment Ion | Peptide Type        | Fragment Type |
|--------------|------------------------|------------------|------|-------------|-----------------------------|------------|--------------|---------------------|---------------|
| CYP1A2       | <a href="#">P05177</a> | IGSTPVLVLSR      | 31.7 | 13.5        | <a href="#">LC Method 1</a> | 571.35     | 783.51       | Light               | b7            |
| CYP1A2       | <a href="#">P05177</a> | IGSTPVLVLSR      | 31.7 | 13.5        | <a href="#">LC Method 1</a> | 571.35     | 375.24       | Light               | y10           |
| CYP1A2       | <a href="#">P05177</a> | IGSTPVLVLSR      | 31.7 | 13.5        | <a href="#">LC Method 1</a> | 571.35     | 392.26       | Light               | y9            |
| CYP1A2       | <a href="#">P05177</a> | IGSTPVLVLSR      | 31.7 | 13.5        | <a href="#">LC Method 1</a> | 576.35     | 793.52       | Heavy R[13C6, 15N4] | y8            |
| CYP1A2       | <a href="#">P05177</a> | IGSTPVLVLSR      | 31.7 | 13.5        | <a href="#">LC Method 1</a> | 576.35     | 397.26       | Heavy R[13C6, 15N4] | y7            |
| Cyp1A2       | <a href="#">P56592</a> | EAEALLSR         | 16.4 | 9.9         | <a href="#">LC Method 1</a> | 444.74     | 688.40       | Light               | y6            |
| Cyp1A2       | <a href="#">P56592</a> | EAEALLSR         | 16.4 | 9.9         | <a href="#">LC Method 1</a> | 444.74     | 559.36       | Light               | y5            |
| Cyp1A2       | <a href="#">P56592</a> | EAEALLSR         | 16.4 | 9.9         | <a href="#">LC Method 1</a> | 444.74     | 488.32       | Light               | y4            |
| Cyp1A2       | <a href="#">P56592</a> | EAEALLSR         | 16.4 | 9.9         | <a href="#">LC Method 1</a> | 444.74     | 514.25       | Light               | b5            |
| Cyp1A2       | <a href="#">P56592</a> | EAEALLSR         | 16.4 | 9.9         | <a href="#">LC Method 1</a> | 449.75     | 698.41       | Heavy R[13C6, 15N4] | y6            |
| Cyp1A2       | <a href="#">P56592</a> | EAEALLSR         | 16.4 | 9.9         | <a href="#">LC Method 1</a> | 449.75     | 569.36       | Heavy R[13C6, 15N4] | y5            |
| Cyp1A2       | <a href="#">P56592</a> | EAEALLSR         | 16.4 | 9.9         | <a href="#">LC Method 1</a> | 449.75     | 498.33       | Heavy R[13C6, 15N4] | y4            |
| Cyp1A2       | <a href="#">P56592</a> | EAEALLSR         | 16.4 | 9.9         | <a href="#">LC Method 1</a> | 449.75     | 514.25       | Heavy R[13C6, 15N4] | b5            |
| Cyp1A2       | <a href="#">P56592</a> | FLTADGTTINK      | 21.0 | 11.3        | <a href="#">LC Method 1</a> | 590.81     | 819.42       | Light               | y8            |
| Cyp1A2       | <a href="#">P56592</a> | FLTADGTTINK      | 21.0 | 11.3        | <a href="#">LC Method 1</a> | 590.81     | 748.38       | Light               | y7            |
| Cyp1A2       | <a href="#">P56592</a> | FLTADGTTINK      | 21.0 | 11.3        | <a href="#">LC Method 1</a> | 590.81     | 633.36       | Light               | y6            |

Download 

Supplementary Fig. 4S

search\_result [Read-Only] - Excel

FILE HOME INSERT PAGE LAYOUT FORMULAS DATA REVIEW VIEW DEVELOPER ADD-INS Foist PDF

Clipboard Font Alignment Number Formatting Table Styles

|    | A      | B      | C                      | D    | E    | F           | G      | H       | I                   | J   |
|----|--------|--------|------------------------|------|------|-------------|--------|---------|---------------------|-----|
| 10 | Cyp1A2 | P56592 | EAEALLSR               | 16.4 | 9.9  | LC_Method_1 | 444.74 | 514.25  | Light               | b5  |
| 11 | Cyp1A2 | P56592 | EAEALLSR               | 16.4 | 9.9  | LC_Method_1 | 449.75 | 698.41  | Heavy R[13C6, 15N4] | y6  |
| 12 | Cyp1A2 | P56592 | EAEALLSR               | 16.4 | 9.9  | LC_Method_1 | 449.75 | 569.36  | Heavy R[13C6, 15N4] | y5  |
| 13 | Cyp1A2 | P56592 | EAEALLSR               | 16.4 | 9.9  | LC_Method_1 | 449.75 | 498.33  | Heavy R[13C6, 15N4] | y4  |
| 14 | Cyp1A2 | P56592 | EAEALLSR               | 16.4 | 9.9  | LC_Method_1 | 449.75 | 514.25  | Heavy R[13C6, 15N4] | b5  |
| 15 | Cyp1A2 | P56592 | FLTADGTTINK            | 21   | 11.3 | LC_Method_1 | 590.81 | 819.42  | Light               | y8  |
| 16 | Cyp1A2 | P56592 | FLTADGTTINK            | 21   | 11.3 | LC_Method_1 | 590.81 | 748.38  | Light               | y7  |
| 17 | Cyp1A2 | P56592 | FLTADGTTINK            | 21   | 11.3 | LC_Method_1 | 590.81 | 633.36  | Light               | y6  |
| 18 | Cyp1A2 | P56592 | FLTADGTTINK            | 21   | 11.3 | LC_Method_1 | 594.82 | 827.43  | Heavy K[13C6, 15N2] | y8  |
| 19 | Cyp1A2 | P56592 | FLTADGTTINK            | 21   | 11.3 | LC_Method_1 | 594.82 | 756.4   | Heavy K[13C6, 15N2] | y7  |
| 20 | Cyp1A2 | P56592 | FLTADGTTINK            | 21   | 11.3 | LC_Method_1 | 594.82 | 641.37  | Heavy K[13C6, 15N2] | y6  |
| 21 | Cyp1A2 | P56592 | SVQDITGALLK            | 26.6 | 14.6 | LC_Method_1 | 572.83 | 830.5   | Light               | y8  |
| 22 | Cyp1A2 | P56592 | SVQDITGALLK            | 26.6 | 14.6 | LC_Method_1 | 572.83 | 715.47  | Light               | y7  |
| 23 | Cyp1A2 | P56592 | SVQDITGALLK            | 26.6 | 14.6 | LC_Method_1 | 572.83 | 602.39  | Light               | y6  |
| 24 | Cyp1A2 | P56592 | SVQDITGALLK            | 26.6 | 14.6 | LC_Method_1 | 576.84 | 838.51  | Heavy K[13C6, 15N2] | y8  |
| 25 | Cyp1A2 | P56592 | SVQDITGALLK            | 26.6 | 14.6 | LC_Method_1 | 576.84 | 723.49  | Heavy K[13C6, 15N2] | y7  |
| 26 | Cyp1A2 | P56592 | SVQDITGALLK            | 26.6 | 14.6 | LC_Method_1 | 576.84 | 610.4   | Heavy K[13C6, 15N2] | y6  |
| 27 | CYP1A2 | P05177 | FLTADGTAINKPLSEK       | 27.6 | 22.7 | LC_method_2 | 852.96 | 815.46  | Light               | b13 |
| 28 | CYP1A2 | P05177 | FLTADGTAINKPLSEK       | 27.6 | 22.7 | LC_method_2 | 852.96 | 573.32  | Light               | y12 |
| 29 | CYP1A2 | P05177 | FLTADGTAINKPLSEK       | 27.6 | 22.7 | LC_method_2 | 852.96 | 579.33  | Light               | y11 |
| 30 | CYP1A2 | P05177 | FLTADGTAINKPLSEK       | 27.6 | 22.7 | LC_method_2 | 856.97 | 581.34  | Heavy K[13C6, 15N2] | y10 |
| 31 | CYP1A2 | P05177 | FLTADGTAINKPLSEK       | 27.6 | 22.7 | LC_method_2 | 856.97 | 583.34  | Heavy K[13C6, 15N2] | y9  |
| 32 | CYP1A2 | P05177 | IGSTPVLVLSR            | 31.7 | 27.3 | LC_method_2 | 571.35 | 783.51  | Light               | b7  |
| 33 | CYP1A2 | P05177 | IGSTPVLVLSR            | 31.7 | 27.3 | LC_method_2 | 571.35 | 375.24  | Light               | y10 |
| 34 | CYP1A2 | P05177 | IGSTPVLVLSR            | 31.7 | 27.3 | LC_method_2 | 571.35 | 392.26  | Light               | y9  |
| 35 | CYP1A2 | P05177 | IGSTPVLVLSR            | 31.7 | 27.3 | LC_method_2 | 576.35 | 793.52  | Heavy R[13C6, 15N4] | y8  |
| 36 | CYP1A2 | P05177 | IGSTPVLVLSR            | 31.7 | 27.3 | LC_method_2 | 576.35 | 397.26  | Heavy R[13C6, 15N4] | y7  |
| 37 | CYP1A2 | P05177 | NTHEFVETASSGNPLDFFPILR | 50.8 | 42.6 | LC_method_2 | 831.08 | 1117.64 | Light               | y9  |
| 38 | CYP1A2 | P05177 | NTHEFVETASSGNPLDFFPILR | 50.8 | 42.6 | LC_method_2 | 831.08 | 645.41  | Light               | y6  |
| 39 | CYP1A2 | P05177 | NTHEFVETASSGNPLDFFPILR | 50.8 | 42.6 | LC_method_2 | 831.08 | 498.34  | Light               | y20 |
| 40 | CYP1A2 | P05177 | NTHEFVETASSGNPLDFFPILR | 50.8 | 42.6 | LC_method_2 | 834.42 | 655.42  | Heavy R[13C6, 15N4] | b17 |
| 41 | CYP1A2 | P05177 | NTHEFVETASSGNPLDFFPILR | 50.8 | 42.6 | LC_method_2 | 834.42 | 508.35  | Heavy R[13C6, 15N4] | b18 |
| 42 |        |        |                        |      |      |             |        |         |                     |     |
| 43 |        |        |                        |      |      |             |        |         |                     |     |
| 44 |        |        |                        |      |      |             |        |         |                     |     |
| 45 |        |        |                        |      |      |             |        |         |                     |     |
| 46 |        |        |                        |      |      |             |        |         |                     |     |
| 47 |        |        |                        |      |      |             |        |         |                     |     |
| 48 |        |        |                        |      |      |             |        |         |                     |     |

Search result for cyp1a2

Supplementary Fig. 5S
